# Supplementary material for: Nine sesquiterpenoid dimers with four unprecedented types of carbon skeleton from Chloranthus henryi var. hupehensis
Source: Royal Society of Chemistry journal article supplement (doi:10.1039/d1qo00810b), 2021-01-01

## Supporting Information

Dan-Yang Zhang,<sup>a</sup> Xiao-Xia Wang,<sup>a</sup> Ya-Nan Wang,<sup>d</sup> Min Wang,<sup>b</sup> Peng-Yu Zhuang,<sup>\*</sup>  
<sup>a</sup> Yang Jin<sup>\*c</sup> and Hang Liu<sup>\*b</sup>

<sup>a</sup>*School of Pharmacy, North China University of Science and Technology, Tangshan 063210, People's Republic of China*

<sup>b</sup>*Department of Pharmacy, Affiliated Drum Tower Hospital of Nanjing University Medical School, Nanjing 210008, People's Republic of China*

<sup>c</sup>*School of Pharmacy, Nanjing Medical University, Nanjing 211166, People's Republic of China*

<sup>d</sup>*State Key Laboratory of Bioactive Substance and Function of Natural Medicines, Institute of Materia Medica, Chinese Academy of Medical Sciences and Peking Union Medical College, Beijing 100050, People's Republic of China*

Email: [zhuangpengyu@ncst.edu.cn](mailto:zhuangpengyu@ncst.edu.cn); telephone: 0086-315-8805808

Email: [yangjin@njmu.edu.cn](mailto:yangjin@njmu.edu.cn); telephone: 0086-25-86868488

Email: [liuhang831123@163.com](mailto:liuhang831123@163.com); telephone: 0086-25-83106666-40332

## Table of Contents

|                                                                                                                                                                                                                                                                                                                                       |     |
|---------------------------------------------------------------------------------------------------------------------------------------------------------------------------------------------------------------------------------------------------------------------------------------------------------------------------------------|-----|
| <b>Figure S1.</b> Key 2D NMR correlations for chlorahupetone C ( <b>3</b> ) .....                                                                                                                                                                                                                                                     | S5  |
| <b>Figure S2.</b> Key 2D NMR correlations for chlorahupetone E ( <b>5</b> ).....                                                                                                                                                                                                                                                      | S5  |
| <b>Figure S3.</b> Key 2D NMR correlations for chlorahupetones H–I ( <b>8–9</b> ).....                                                                                                                                                                                                                                                 | S5  |
| <b>ECD calculation details</b> .....                                                                                                                                                                                                                                                                                                  | S6  |
| <b>1. Results</b> .....                                                                                                                                                                                                                                                                                                               | S6  |
| <b>Table S1.</b> Gibbs free energies <sup>a</sup> and equilibrium populations <sup>b</sup> of low-energy conformers of 1 <i>R</i> , 3 <i>S</i> , 6 <i>R</i> , 7 <i>S</i> , 9 <i>R</i> , 10 <i>S</i> , 11 <i>R</i> , 1' <i>S</i> , 5' <i>R</i> , 6' <i>S</i> , 7' <i>S</i> , 9' <i>R</i> ,10' <i>R</i> - <b>3</b> .....                | S6  |
| <b>Figure S4.</b> The low-energy reoptimized MMFF conformers of 1 <i>R</i> , 3 <i>S</i> , 6 <i>R</i> , 7 <i>S</i> , 9 <i>R</i> , 10 <i>S</i> , 11 <i>R</i> , 1' <i>S</i> , 5' <i>R</i> , 6' <i>S</i> , 7' <i>S</i> , 9' <i>R</i> ,10' <i>R</i> - <b>3</b> at B3LYP/6-31G (d, p) level of theory in gas. ....                          | S6  |
| <b>Table S2.</b> Cartesian coordinates for the low-energy reoptimized MMFF conformers of 1 <i>R</i> , 3 <i>S</i> , 6 <i>R</i> , 7 <i>S</i> , 9 <i>R</i> , 10 <i>S</i> , 11 <i>R</i> , 1' <i>S</i> , 5' <i>R</i> , 6' <i>S</i> , 7' <i>S</i> , 9' <i>R</i> ,10' <i>R</i> - <b>3</b> at B3LYP/6-31G (d, p) level of theory in gas. .... | S6  |
| <b>Table S3.</b> Gibbs free energies <sup>a</sup> and equilibrium populations <sup>b</sup> of low-energy conformers of 1 <i>S</i> , 3 <i>R</i> , 6 <i>S</i> , 7 <i>R</i> , 9 <i>S</i> , 10 <i>R</i> , 11 <i>S</i> , 1' <i>R</i> , 5' <i>S</i> , 6' <i>R</i> , 7' <i>R</i> , 9' <i>S</i> ,10' <i>S</i> - <b>3</b> .....                | S16 |
| <b>Figure S5.</b> The low-energy reoptimized MMFF conformers of 1 <i>S</i> , 3 <i>R</i> , 6 <i>S</i> , 7 <i>R</i> , 9 <i>S</i> , 10 <i>R</i> , 11 <i>S</i> , 1' <i>R</i> , 5' <i>S</i> , 6' <i>R</i> , 7' <i>R</i> , 9' <i>S</i> ,10' <i>S</i> - <b>3</b> at B3LYP/6-31G(d,p) level of theory in gas.....                             | S16 |
| <b>Table S4.</b> Cartesian coordinates for the low-energy reoptimized MMFF conformers of 1 <i>S</i> , 3 <i>R</i> , 6 <i>S</i> , 7 <i>R</i> , 9 <i>S</i> , 10 <i>R</i> , 11 <i>S</i> , 1' <i>R</i> , 5' <i>S</i> , 6' <i>R</i> , 7' <i>R</i> , 9' <i>S</i> ,10' <i>S</i> – <b>3</b> at B3LYP/6-31G (d, p) level of theory in gas. ...  | S16 |
| <b>Figure S6.</b> <sup>1</sup> H NMR spectrum of chlorahupetone A ( <b>1</b> ) in CDCl <sub>3</sub> .....                                                                                                                                                                                                                             | S27 |
| <b>Figure S7.</b> <sup>13</sup> C NMR and DEPT spectrum of chlorahupetone A ( <b>1</b> ) in CDCl <sub>3</sub> .....                                                                                                                                                                                                                   | S28 |
| <b>Figure S8.</b> HSQC spectrum of chlorahupetone A ( <b>1</b> ) in CDCl <sub>3</sub> .....                                                                                                                                                                                                                                           | S29 |
| <b>Figure S9.</b> HMBC spectrum of chlorahupetone A ( <b>1</b> ) in CDCl <sub>3</sub> .....                                                                                                                                                                                                                                           | S30 |
| <b>Figure S10.</b> <sup>1</sup> H- <sup>1</sup> H COSY spectrum of chlorahupetone A ( <b>1</b> ) in CDCl <sub>3</sub> .....                                                                                                                                                                                                           | S31 |
| <b>Figure S11.</b> NOESY spectrum of chlorahupetone A ( <b>1</b> ) in CDCl <sub>3</sub> .....                                                                                                                                                                                                                                         | S32 |
| <b>Figure S12.</b> (-)-HRESIMS spectrum of chlorahupetone A ( <b>1</b> ) .....                                                                                                                                                                                                                                                        | S33 |
| <b>Figure S13.</b> IR spectrum of chlorahupetone A ( <b>1</b> ).....                                                                                                                                                                                                                                                                  | S34 |
| <b>Figure S14.</b> <sup>1</sup> H NMR spectrum of chlorahupetone B ( <b>2</b> ) in pyridine- <i>d</i> <sub>5</sub> .....                                                                                                                                                                                                              | S35 |
| <b>Figure S15.</b> <sup>13</sup> C NMR spectrum of chlorahupetone B ( <b>2</b> ) in pyridine- <i>d</i> <sub>5</sub> .....                                                                                                                                                                                                             | S36 |
| <b>Figure S16.</b> HSQC spectrum of chlorahupetone B ( <b>2</b> ) in pyridine- <i>d</i> <sub>5</sub> .....                                                                                                                                                                                                                            | S37 |
| <b>Figure S17.</b> HMBC spectrum of chlorahupetone B ( <b>2</b> ) in pyridine- <i>d</i> <sub>5</sub> .....                                                                                                                                                                                                                            | S38 |
| <b>Figure S18.</b> <sup>1</sup> H- <sup>1</sup> H COSY spectrum of chlorahupetone B ( <b>2</b> ) in pyridine- <i>d</i> <sub>5</sub> .....                                                                                                                                                                                             | S39 |
| <b>Figure S19.</b> NOESY spectrum of chlorahupetone B ( <b>2</b> ) in pyridine- <i>d</i> <sub>5</sub> .....                                                                                                                                                                                                                           | S40 |
| <b>Figure S20.</b> (+)-HRESIMS spectrum of chlorahupetone B ( <b>2</b> ).....                                                                                                                                                                                                                                                         | S41 |
| <b>Figure S21.</b> IR spectrum of chlorahupetone B ( <b>2</b> ) .....                                                                                                                                                                                                                                                                 | S42 |
| <b>Figure S22.</b> <sup>1</sup> H NMR spectrum of chlorahupetone C ( <b>3</b> ) in CDCl <sub>3</sub> .....                                                                                                                                                                                                                            | S43 |
| <b>Figure S23.</b> <sup>13</sup> C NMR and DEPT spectrum of chlorahupetone C ( <b>3</b> ) in CDCl <sub>3</sub> .....                                                                                                                                                                                                                  | S44 |
| <b>Figure S24.</b> HSQC spectrum of chlorahupetone C ( <b>3</b> ) in CDCl <sub>3</sub> .....                                                                                                                                                                                                                                          | S45 |
| <b>Figure S25.</b> HMBC spectrum of chlorahupetone C ( <b>3</b> ) in CDCl <sub>3</sub> .....                                                                                                                                                                                                                                          | S46 |
| <b>Figure S26.</b> <sup>1</sup> H- <sup>1</sup> H COSY spectrum of chlorahupetone C ( <b>3</b> ) in CDCl <sub>3</sub> .....                                                                                                                                                                                                           | S47 |
| <b>Figure S27.</b> NOESY spectrum of chlorahupetone C ( <b>3</b> ) in CDCl <sub>3</sub> .....                                                                                                                                                                                                                                         | S48 |
| <b>Figure S28.</b> (+)-HRESIMS spectrum of chlorahupetone C ( <b>3</b> ).....                                                                                                                                                                                                                                                         | S49 |
| <b>Figure S29.</b> IR spectrum of chlorahupetone C ( <b>3</b> ) .....                                                                                                                                                                                                                                                                 | S50 |
| <b>Figure S30.</b> <sup>1</sup> H NMR spectrum of chlorahupetone D ( <b>4</b> ) in pyridine- <i>d</i> <sub>5</sub> .....                                                                                                                                                                                                              | S51 |

|                                                                                                                        |     |
|------------------------------------------------------------------------------------------------------------------------|-----|
| <b>Figure S31.</b> $^{13}\text{C}$ NMR and DEPT spectrum of chlorahupetone D ( <b>4</b> ) in pyridine- $d_5$ .....     | S52 |
| <b>Figure S32.</b> HSQC spectrum of chlorahupetone D ( <b>4</b> ) in pyridine- $d_5$ .....                             | S53 |
| <b>Figure S33.</b> HMBC spectrum of chlorahupetone D ( <b>4</b> ) in pyridine- $d_5$ .....                             | S54 |
| <b>Figure S34.</b> $^1\text{H}$ - $^1\text{H}$ COSY spectrum of chlorahupetone D ( <b>4</b> ) in pyridine- $d_5$ ..... | S55 |
| <b>Figure S35.</b> NOESY spectrum of chlorahupetone D ( <b>4</b> ) in pyridine- $d_5$ .....                            | S56 |
| <b>Figure S36.</b> (+)-HRESIMS spectrum of chlorahupetone D ( <b>4</b> ).....                                          | S57 |
| <b>Figure S37.</b> IR spectrum of chlorahupetone D ( <b>4</b> ) .....                                                  | S58 |
| <b>Figure S38.</b> $^1\text{H}$ NMR spectrum of chlorahupetone E ( <b>5</b> ) in $\text{CDCl}_3$ .....                 | S59 |
| <b>Figure S39.</b> $^{13}\text{C}$ NMR and DEPT spectrum of chlorahupetone E ( <b>5</b> ) in $\text{CDCl}_3$ .....     | S60 |
| <b>Figure S40.</b> HSQC spectrum of chlorahupetone E ( <b>5</b> ) in $\text{CDCl}_3$ .....                             | S61 |
| <b>Figure S41.</b> HMBC spectrum of chlorahupetone E ( <b>5</b> ) in $\text{CDCl}_3$ .....                             | S62 |
| <b>Figure S42.</b> $^1\text{H}$ - $^1\text{H}$ COSY spectrum of chlorahupetone E ( <b>5</b> ) in $\text{CDCl}_3$ ..... | S63 |
| <b>Figure S43.</b> NOESY spectrum of chlorahupetone E ( <b>5</b> ) in $\text{CDCl}_3$ .....                            | S64 |
| <b>Figure S44.</b> (+)-HRESIMS spectrum of chlorahupetone E ( <b>5</b> ) .....                                         | S65 |
| <b>Figure S45.</b> IR spectrum of chlorahupetone E ( <b>5</b> ).....                                                   | S66 |
| <b>Figure S46.</b> $^1\text{H}$ NMR spectrum of chlorahupetone F ( <b>6</b> ) in $\text{CDCl}_3$ .....                 | S67 |
| <b>Figure S47.</b> $^{13}\text{C}$ NMR and DEPT spectrum of chlorahupetone F ( <b>6</b> ) in $\text{CDCl}_3$ .....     | S68 |
| <b>Figure S48.</b> HSQC spectrum of chlorahupetone F ( <b>6</b> ) in $\text{CDCl}_3$ .....                             | S69 |
| <b>Figure S49.</b> HMBC spectrum of chlorahupetone F ( <b>6</b> ) in $\text{CDCl}_3$ .....                             | S70 |
| <b>Figure S50.</b> $^1\text{H}$ - $^1\text{H}$ COSY spectrum of chlorahupetone F ( <b>6</b> ) in $\text{CDCl}_3$ ..... | S71 |
| <b>Figure S51.</b> NOESY spectrum of chlorahupetone F ( <b>6</b> ) in $\text{CDCl}_3$ .....                            | S72 |
| <b>Figure S52.</b> (+)-HRESIMS spectrum of chlorahupetone F ( <b>6</b> ) .....                                         | S73 |
| <b>Figure S53.</b> IR spectrum of chlorahupetone F ( <b>6</b> ).....                                                   | S74 |
| <b>Figure S54.</b> $^1\text{H}$ NMR spectrum of chlorahupetone G ( <b>7</b> ) in $\text{CDCl}_3$ .....                 | S75 |
| <b>Figure S55.</b> $^{13}\text{C}$ NMR and DEPT spectrum of chlorahupetone G ( <b>7</b> ) in $\text{CDCl}_3$ .....     | S76 |
| <b>Figure S56.</b> HSQC spectrum of chlorahupetone G ( <b>7</b> ) in $\text{CDCl}_3$ .....                             | S77 |
| <b>Figure S57.</b> HMBC spectrum of chlorahupetone G ( <b>7</b> ) in $\text{CDCl}_3$ .....                             | S78 |
| <b>Figure S58.</b> $^1\text{H}$ - $^1\text{H}$ COSY spectrum of chlorahupetone G ( <b>7</b> ) in $\text{CDCl}_3$ ..... | S79 |
| <b>Figure S59.</b> NOESY spectrum of chlorahupetone G ( <b>7</b> ) in $\text{CDCl}_3$ .....                            | S80 |
| <b>Figure S60.</b> (-)-HRESIMS spectrum of chlorahupetone G ( <b>7</b> ).....                                          | S81 |
| <b>Figure S61.</b> IR spectrum of chlorahupetone G ( <b>7</b> ) .....                                                  | S82 |
| <b>Figure S62.</b> $^1\text{H}$ NMR spectrum of chlorahupetone H ( <b>8</b> ) in $\text{CDCl}_3$ .....                 | S83 |
| <b>Figure S63.</b> $^{13}\text{C}$ NMR and DEPT spectrum of chlorahupetone H ( <b>8</b> ) in $\text{CDCl}_3$ .....     | S84 |
| <b>Figure S64.</b> HSQC spectrum of chlorahupetone H ( <b>8</b> ) in $\text{CDCl}_3$ .....                             | S85 |
| <b>Figure S65.</b> HMBC spectrum of chlorahupetone H ( <b>8</b> ) in $\text{CDCl}_3$ .....                             | S86 |
| <b>Figure S66.</b> $^1\text{H}$ - $^1\text{H}$ COSY spectrum of chlorahupetone H ( <b>8</b> ) in $\text{CDCl}_3$ ..... | S87 |
| <b>Figure S67.</b> NOESY spectrum of chlorahupetone H ( <b>8</b> ) in $\text{CDCl}_3$ .....                            | S88 |
| <b>Figure S68.</b> (+)-HRESIMS spectrum of chlorahupetone H ( <b>8</b> ).....                                          | S89 |
| <b>Figure S69.</b> IR spectrum of chlorahupetone H ( <b>8</b> ) .....                                                  | S90 |
| <b>Figure S70.</b> $^1\text{H}$ NMR spectrum of chlorahupetone I ( <b>9</b> ) in $\text{CDCl}_3$ .....                 | S91 |
| <b>Figure S71.</b> $^{13}\text{C}$ NMR and DEPT spectrum of chlorahupetone I ( <b>9</b> ) in $\text{CDCl}_3$ .....     | S92 |
| <b>Figure S72.</b> HSQC spectrum of chlorahupetone I ( <b>9</b> ) in $\text{CDCl}_3$ .....                             | S93 |
| <b>Figure S73.</b> HMBC spectrum of chlorahupetone I ( <b>9</b> ) in $\text{CDCl}_3$ .....                             | S94 |
| <b>Figure S74.</b> $^1\text{H}$ - $^1\text{H}$ COSY spectrum of chlorahupetone I ( <b>9</b> ) in $\text{CDCl}_3$ ..... | S95 |

|                                                                                               |     |
|-----------------------------------------------------------------------------------------------|-----|
| <b>Figure S75.</b> NOESY spectrum of chlorahupetone I ( <b>9</b> ) in CDCl <sub>3</sub> ..... | S96 |
| <b>Figure S76.</b> (+)-HRESIMS spectrum of chlorahupetone I ( <b>9</b> ) .....                | S97 |
| <b>Figure S77.</b> IR spectrum of chlorahupetone I ( <b>9</b> ).....                          | S98 |

**Figure S1.** Key 2D NMR correlations for chlorahupetone C (**3**)

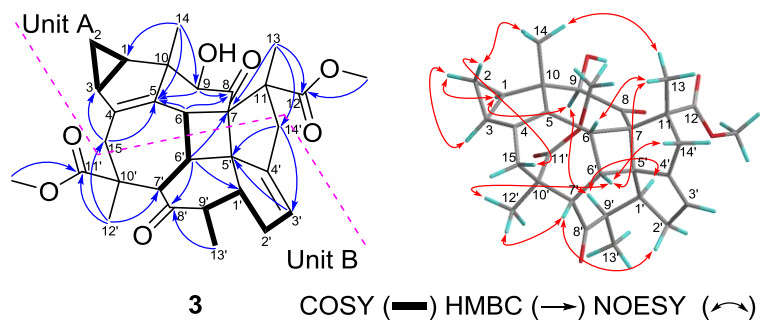

**Figure S2.** Key 2D NMR correlations for chlorahupetone E (**5**)

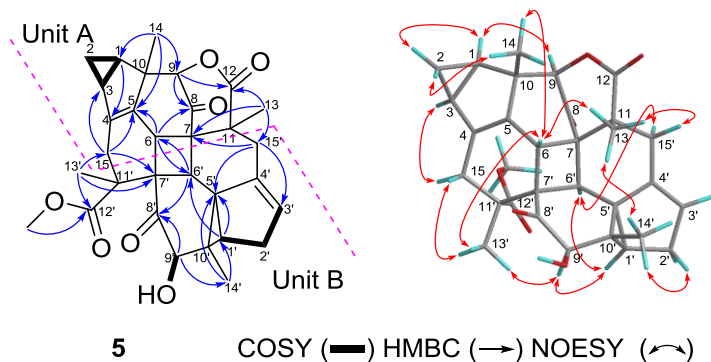

**Figure S3.** Key 2D NMR correlations for chlorahupetones H-I (**8-9**)

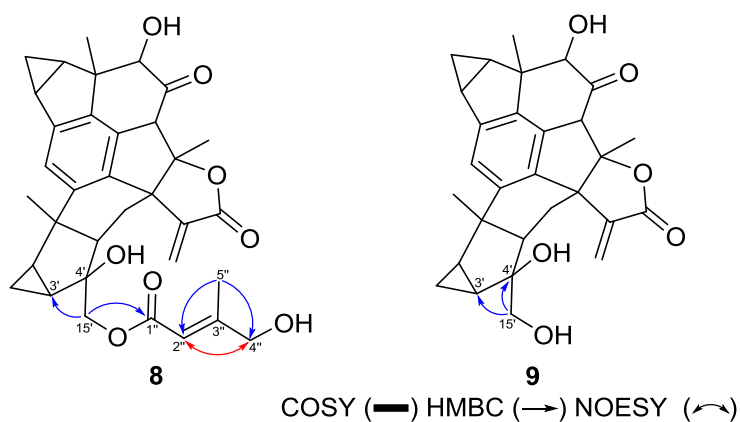

## ECD calculation details

### 1. Results

**Table S1.** Gibbs free energies<sup>a</sup> and equilibrium populations<sup>b</sup> of low-energy conformers of 1*R*, 3*S*, 6*R*, 7*S*, 9*R*, 10*S*, 11*R*, 1'*S*, 5'*R*, 6'*S*, 7'*S*, 9'*R*, 10'*R* - **3**.

| Conformers | In gas            |                      |
|------------|-------------------|----------------------|
|            | $G^a$             | $P$ (%) <sup>b</sup> |
| <b>3-a</b> | -1084934.73980112 | 15.60                |
| <b>3-b</b> | -1084934.91299388 | 20.91                |
| <b>3-c</b> | -1084935.02782821 | 25.38                |
| <b>3-d</b> | -1084934.7448212  | 15.74                |
| <b>3-e</b> | -1084934.95315452 | 22.37                |

<sup>a</sup>B3LYP/6-31G(d, p), in kcal/mol. <sup>b</sup>From  $G$  values at 298.15K.

**Figure S4.** The low-energy reoptimized MMFF conformers of 1*R*, 3*S*, 6*R*, 7*S*, 9*R*, 10*S*, 11*R*, 1'*S*, 5'*R*, 6'*S*, 7'*S*, 9'*R*, 10'*R* - **3** at B3LYP/6-31G (d, p) level of theory in gas.

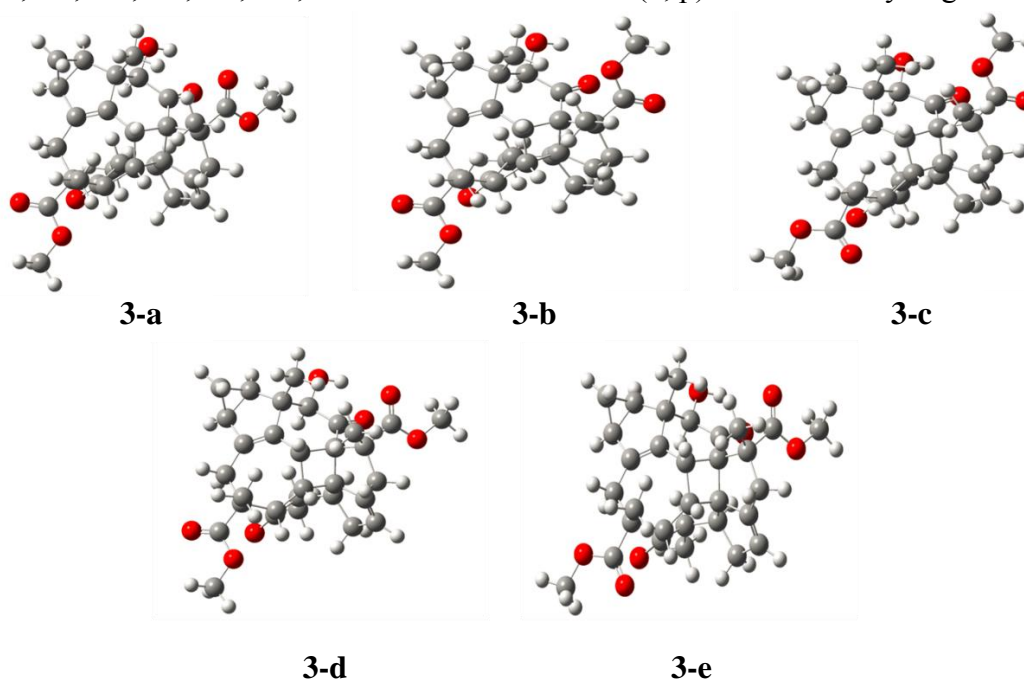

**Table S2.** Cartesian coordinates for the low-energy reoptimized MMFF conformers of 1*R*, 3*S*, 6*R*, 7*S*, 9*R*, 10*S*, 11*R*, 1'*S*, 5'*R*, 6'*S*, 7'*S*, 9'*R*, 10'*R* - **3** at B3LYP/6-31G (d, p) level of theory in gas.

| Conformer <b>3a</b> |      | Standard Orientation<br>(Ångstroms) |           |          |          |
|---------------------|------|-------------------------------------|-----------|----------|----------|
| Center number       | Atom | Type                                | X         | Y        | Z        |
| 1.                  | 6.   | 0.                                  | -0.808171 | 2.729111 | 0.164053 |

|     |    |    |           |           |           |
|-----|----|----|-----------|-----------|-----------|
| 2.  | 6. | 0. | 0.258743  | 1.749431  | -0.340100 |
| 3.  | 6. | 0. | 1.508003  | 2.141718  | -0.013441 |
| 4.  | 6. | 0. | -1.551175 | 1.948177  | 1.265955  |
| 5.  | 6. | 0. | -2.151833 | 0.632579  | 0.735180  |
| 6.  | 6. | 0. | -0.214531 | 0.512516  | -1.041858 |
| 7.  | 6. | 0. | -1.499584 | -0.136586 | -0.399873 |
| 8.  | 6. | 0. | 2.862742  | 1.513995  | -0.209593 |
| 9.  | 6. | 0. | 2.981177  | 0.135913  | -0.899284 |
| 10. | 6. | 0. | 1.996743  | -0.918989 | -0.292548 |
| 11. | 6. | 0. | 0.554286  | -0.825630 | -0.823064 |
| 12. | 6. | 0. | -0.601114 | -1.359712 | 0.095736  |
| 13. | 6. | 0. | -0.268774 | -1.663077 | 1.572990  |
| 14. | 6. | 0. | -2.540006 | -0.812081 | -1.448422 |
| 15. | 6. | 0. | -1.293154 | -2.606036 | -0.364714 |
| 16. | 6. | 0. | -2.113632 | -2.319478 | -1.576748 |
| 17. | 6. | 0. | -1.078981 | -3.635476 | 0.457429  |
| 18. | 6. | 0. | -0.187780 | -3.223166 | 1.610477  |
| 19. | 6. | 0. | 0.950972  | -0.911162 | 2.137327  |
| 20. | 6. | 0. | 2.171595  | -1.001491 | 1.231853  |
| 21. | 8. | 0. | 3.295979  | -1.123507 | 1.690936  |
| 22. | 6. | 0. | 2.788398  | 0.261467  | -2.431680 |
| 23. | 6. | 0. | 1.278109  | -1.278617 | 3.586773  |
| 24. | 8. | 0. | -2.560178 | 2.713656  | 1.880770  |
| 25. | 6. | 0. | 1.474982  | 3.472612  | 0.681485  |
| 26. | 6. | 0. | 0.017305  | 3.872867  | 0.763540  |
| 27. | 6. | 0. | 0.949167  | 4.633106  | -0.142640 |
| 28. | 6. | 0. | -1.817178 | 3.228242  | -0.888520 |
| 29. | 8. | 0. | -3.131873 | 0.197088  | 1.327014  |
| 30. | 6. | 0. | -2.537877 | -0.153975 | -2.844226 |
| 31. | 6. | 0. | -3.988590 | -0.660553 | -0.939479 |
| 32. | 8. | 0. | -4.474788 | -1.772929 | -0.360435 |
| 33. | 8. | 0. | -4.642023 | 0.348728  | -1.103841 |
| 34. | 6. | 0. | -5.788792 | -1.638033 | 0.206408  |
| 35. | 1. | 0. | -1.143814 | -1.384781 | 2.172856  |
| 36. | 6. | 0. | 4.437758  | -0.335095 | -0.708467 |
| 37. | 8. | 0. | 4.605094  | -1.619622 | -1.098565 |
| 38. | 8. | 0. | 5.354063  | 0.371753  | -0.352166 |
| 39. | 6. | 0. | 5.936875  | -2.135649 | -0.941791 |
| 40. | 1. | 0. | -0.352823 | 0.747408  | -2.101362 |
| 41. | 1. | 0. | 2.370525  | -1.895737 | -0.624678 |
| 42. | 1. | 0. | 0.533590  | -1.375515 | -1.769134 |
| 43. | 1. | 0. | -0.795999 | 1.652170  | 2.018296  |
| 44. | 1. | 0. | 3.496456  | 2.226489  | -0.753229 |

|     |    |    |           |           |           |
|-----|----|----|-----------|-----------|-----------|
| 45. | 1. | 0. | 3.340718  | 1.442241  | 0.775045  |
| 46. | 1. | 0. | -1.503124 | -2.428903 | -2.483149 |
| 47. | 1. | 0. | -2.973719 | -2.980477 | -1.687352 |
| 48. | 1. | 0. | -1.477811 | -4.638747 | 0.343188  |
| 49. | 1. | 0. | 0.844914  | -3.577981 | 1.467667  |
| 50. | 1. | 0. | -0.519832 | -3.629049 | 2.572406  |
| 51. | 1. | 0. | 0.699236  | 0.160638  | 2.103033  |
| 52. | 1. | 0. | 1.833108  | 0.728646  | -2.678426 |
| 53. | 1. | 0. | 2.840150  | -0.715796 | -2.919248 |
| 54. | 1. | 0. | 3.578869  | 0.891064  | -2.852427 |
| 55. | 1. | 0. | 1.571970  | -2.328730 | 3.672728  |
| 56. | 1. | 0. | 2.108938  | -0.677534 | 3.960629  |
| 57. | 1. | 0. | 0.406569  | -1.112412 | 4.227717  |
| 58. | 1. | 0. | -3.253465 | 2.076689  | 2.126502  |
| 59. | 1. | 0. | 2.190494  | 3.670918  | 1.475314  |
| 60. | 1. | 0. | -0.387475 | 4.383885  | 1.630913  |
| 61. | 1. | 0. | 0.881946  | 4.499688  | -1.218664 |
| 62. | 1. | 0. | 1.224047  | 5.636255  | 0.170749  |
| 63. | 1. | 0. | -1.306972 | 3.694096  | -1.735595 |
| 64. | 1. | 0. | -2.478493 | 3.967126  | -0.430393 |
| 65. | 1. | 0. | -2.455551 | 2.425323  | -1.269452 |
| 66. | 1. | 0. | -3.280939 | -0.650088 | -3.476999 |
| 67. | 1. | 0. | -1.569897 | -0.264469 | -3.338426 |
| 68. | 1. | 0. | -2.803407 | 0.902555  | -2.799440 |
| 69. | 1. | 0. | -5.775970 | -0.878968 | 0.991179  |
| 70. | 1. | 0. | -6.512707 | -1.351900 | -0.559999 |
| 71. | 1. | 0. | -6.031595 | -2.616536 | 0.620248  |
| 72. | 1. | 0. | 5.903383  | -3.157633 | -1.319258 |
| 73. | 1. | 0. | 6.652881  | -1.537823 | -1.510396 |
| 74. | 1. | 0. | 6.221496  | -2.125021 | 0.112900  |

| Conformer <b>3b</b> |      | Standard Orientation<br>(Ångstroms) |           |           |           |
|---------------------|------|-------------------------------------|-----------|-----------|-----------|
| Center number       | Atom | Type                                | X         | Y         | Z         |
| 1.                  | 6.   | 0.                                  | -1.100344 | 2.519802  | 0.197922  |
| 2.                  | 6.   | 0.                                  | 0.055670  | 1.655581  | -0.321573 |
| 3.                  | 6.   | 0.                                  | 1.261424  | 2.190722  | -0.039205 |
| 4.                  | 6.   | 0.                                  | -1.738388 | 1.677221  | 1.320743  |
| 5.                  | 6.   | 0.                                  | -2.198176 | 0.294211  | 0.823591  |
| 6.                  | 6.   | 0.                                  | -0.294991 | 0.363239  | -0.995262 |
| 7.                  | 6.   | 0.                                  | -1.479562 | -0.412095 | -0.306672 |
| 8.                  | 6.   | 0.                                  | 2.669800  | 1.716169  | -0.279155 |



|     |    |    |           |           |           |
|-----|----|----|-----------|-----------|-----------|
| 9.  | 6. | 0. | 2.917446  | 0.356695  | -0.971849 |
| 10. | 6. | 0. | 2.089929  | -0.803025 | -0.319921 |
| 11. | 6. | 0. | 0.620897  | -0.880052 | -0.777805 |
| 12. | 6. | 0. | -0.430162 | -1.499195 | 0.213025  |
| 13. | 6. | 0. | -0.006407 | -1.675529 | 1.690961  |
| 14. | 6. | 0. | -2.442772 | -1.243157 | -1.308069 |
| 15. | 6. | 0. | -1.008596 | -2.835557 | -0.137859 |
| 16. | 6. | 0. | -1.932189 | -2.727052 | -1.304715 |
| 17. | 6. | 0. | -0.658557 | -3.783595 | 0.734319  |
| 18. | 6. | 0. | 0.232003  | -3.214860 | 1.817404  |
| 19. | 6. | 0. | 1.161740  | -0.784208 | 2.153965  |
| 20. | 6. | 0. | 2.342160  | -0.841329 | 1.196253  |
| 21. | 8. | 0. | 3.492316  | -0.898890 | 1.600522  |
| 22. | 6. | 0. | 2.648388  | 0.448052  | -2.494735 |
| 23. | 6. | 0. | 1.582052  | -1.032825 | 3.604646  |
| 24. | 8. | 0. | -2.818936 | 2.336821  | 1.939626  |
| 25. | 6. | 0. | 1.100360  | 3.514241  | 0.652396  |
| 26. | 6. | 0. | -0.390196 | 3.751589  | 0.772572  |
| 27. | 6. | 0. | 0.429340  | 4.607033  | -0.157797 |
| 28. | 6. | 0. | -2.165854 | 2.897998  | -0.848711 |
| 29. | 8. | 0. | -3.108944 | -0.243638 | 1.442017  |
| 30. | 6. | 0. | -2.447196 | -0.705700 | -2.759705 |
| 31. | 6. | 0. | -3.918217 | -1.222425 | -0.855293 |
| 32. | 8. | 0. | -4.443747 | 0.017829  | -0.988349 |
| 33. | 8. | 0. | -4.572844 | -2.185914 | -0.529088 |
| 34. | 6. | 0. | -5.801604 | 0.160043  | -0.538944 |
| 35. | 1. | 0. | -0.877601 | -1.446750 | 2.316626  |
| 36. | 6. | 0. | 4.425488  | 0.057947  | -0.837833 |
| 37. | 8. | 0. | 4.729213  | -1.189562 | -1.262297 |
| 38. | 8. | 0. | 5.263191  | 0.860612  | -0.490821 |
| 39. | 6. | 0. | 6.116106  | -1.549446 | -1.153749 |
| 40. | 1. | 0. | -0.488191 | 0.564785  | -2.052850 |
| 41. | 1. | 0. | 2.561323  | -1.730886 | -0.665117 |
| 42. | 1. | 0. | 0.611457  | -1.460461 | -1.706219 |
| 43. | 1. | 0. | -0.944760 | 1.476906  | 2.065026  |
| 44. | 1. | 0. | 3.202165  | 2.492140  | -0.844288 |
| 45. | 1. | 0. | 3.186350  | 1.703093  | 0.688585  |
| 46. | 1. | 0. | -1.402099 | -2.925316 | -2.245220 |
| 47. | 1. | 0. | -2.771443 | -3.421917 | -1.245328 |
| 48. | 1. | 0. | -0.966850 | -4.824028 | 0.703178  |
| 49. | 1. | 0. | 1.288909  | -3.476601 | 1.652035  |
| 50. | 1. | 0. | -0.022012 | -3.587743 | 2.815719  |
| 51. | 1. | 0. | 0.816824  | 0.257757  | 2.068264  |

|     |    |    |           |           |           |
|-----|----|----|-----------|-----------|-----------|
| 52. | 1. | 0. | 1.635747  | 0.798252  | -2.702463 |
| 53. | 1. | 0. | 2.794728  | -0.519939 | -2.981104 |
| 54. | 1. | 0. | 3.341283  | 1.162936  | -2.950098 |
| 55. | 1. | 0. | 1.980534  | -2.042769 | 3.735694  |
| 56. | 1. | 0. | 2.365458  | -0.334714 | 3.905982  |
| 57. | 1. | 0. | 0.725901  | -0.910945 | 4.275677  |
| 58. | 1. | 0. | -3.400753 | 1.624880  | 2.258207  |
| 59. | 1. | 0. | 1.809519  | 3.792783  | 1.427750  |
| 60. | 1. | 0. | -0.824717 | 4.218947  | 1.650224  |
| 61. | 1. | 0. | 0.350371  | 4.466252  | -1.232191 |
| 62. | 1. | 0. | 0.599887  | 5.635078  | 0.149135  |
| 63. | 1. | 0. | -1.718524 | 3.448622  | -1.680130 |
| 64. | 1. | 0. | -2.923182 | 3.531133  | -0.379991 |
| 65. | 1. | 0. | -2.682953 | 2.023124  | -1.253131 |
| 66. | 1. | 0. | -3.161682 | -1.284146 | -3.355129 |
| 67. | 1. | 0. | -1.468367 | -0.827258 | -3.230631 |
| 68. | 1. | 0. | -2.741332 | 0.343304  | -2.816203 |
| 69. | 1. | 0. | -6.067627 | 1.199135  | -0.731314 |
| 70. | 1. | 0. | -6.461171 | -0.516213 | -1.087044 |
| 71. | 1. | 0. | -5.865576 | -0.062619 | 0.528510  |
| 72. | 1. | 0. | 6.190367  | -2.560527 | -1.553975 |
| 73. | 1. | 0. | 6.740267  | -0.860634 | -1.727604 |
| 74. | 1. | 0. | 6.428217  | -1.526685 | -0.107136 |

| Conformer 3c  |      | Standard Orientation<br>(Ångstroms) |           |           |           |
|---------------|------|-------------------------------------|-----------|-----------|-----------|
| Center number | Atom | Type                                | X         | Y         | Z         |
| 1.            | 6.   | 0.                                  | -0.839936 | 2.543284  | 0.286714  |
| 2.            | 6.   | 0.                                  | 0.210837  | 1.591287  | -0.299869 |
| 3.            | 6.   | 0.                                  | 1.472026  | 1.999950  | -0.043888 |
| 4.            | 6.   | 0.                                  | -1.532523 | 1.725396  | 1.393862  |
| 5.            | 6.   | 0.                                  | -2.142701 | 0.415076  | 0.856647  |
| 6.            | 6.   | 0.                                  | -0.286093 | 0.365642  | -1.006557 |
| 7.            | 6.   | 0.                                  | -1.535206 | -0.310745 | -0.326581 |
| 8.            | 6.   | 0.                                  | 2.825724  | 1.413459  | -0.359347 |
| 9.            | 6.   | 0.                                  | 2.910402  | 0.024664  | -1.035564 |
| 10.           | 6.   | 0.                                  | 1.963248  | -1.017137 | -0.355621 |
| 11.           | 6.   | 0.                                  | 0.507786  | -0.965493 | -0.843368 |
| 12.           | 6.   | 0.                                  | -0.602508 | -1.535054 | 0.107476  |
| 13.           | 6.   | 0.                                  | -0.202259 | -1.873382 | 1.560667  |
| 14.           | 6.   | 0.                                  | -2.605527 | -0.972840 | -1.346254 |
| 15.           | 6.   | 0.                                  | -1.303762 | -2.779081 | -0.345908 |

|     |    |    |           |           |           |
|-----|----|----|-----------|-----------|-----------|
| 16. | 6. | 0. | -2.215517 | -2.485941 | -1.489171 |
| 17. | 6. | 0. | -1.022135 | -3.827655 | 0.430631  |
| 18. | 6. | 0. | -0.071774 | -3.429940 | 1.539631  |
| 19. | 6. | 0. | 1.005567  | -1.101339 | 2.116804  |
| 20. | 6. | 0. | 2.192566  | -1.030368 | 1.162043  |
| 21. | 8. | 0. | 3.334148  | -0.958569 | 1.590060  |
| 22. | 6. | 0. | 2.629608  | 0.132531  | -2.555887 |
| 23. | 6. | 0. | 1.423540  | -1.549565 | 3.521066  |
| 24. | 8. | 0. | -2.528335 | 2.464656  | 2.063596  |
| 25. | 6. | 0. | 1.459442  | 3.306017  | 0.698036  |
| 26. | 6. | 0. | 0.003466  | 3.678057  | 0.880469  |
| 27. | 6. | 0. | 0.869933  | 4.487494  | -0.048642 |
| 28. | 6. | 0. | -1.892913 | 3.065560  | -0.710734 |
| 29. | 8. | 0. | -3.085043 | -0.053171 | 1.483989  |
| 30. | 6. | 0. | -2.628195 | -0.315772 | -2.747192 |
| 31. | 6. | 0. | -4.052035 | -0.885517 | -0.813759 |
| 32. | 8. | 0. | -4.507874 | 0.387847  | -0.862600 |
| 33. | 8. | 0. | -4.745177 | -1.823490 | -0.492475 |
| 34. | 6. | 0. | -5.831528 | 0.584538  | -0.338266 |
| 35. | 1. | 0. | -1.066553 | -1.650294 | 2.198254  |
| 36. | 6. | 0. | 4.336774  | -0.558448 | -0.957327 |
| 37. | 8. | 0. | 5.271461  | 0.361700  | -0.653332 |
| 38. | 8. | 0. | 4.603797  | -1.707852 | -1.241333 |
| 39. | 6. | 0. | 6.619120  | -0.135860 | -0.588444 |
| 40. | 1. | 0. | -0.470520 | 0.619989  | -2.054430 |
| 41. | 1. | 0. | 2.351553  | -1.998894 | -0.663556 |
| 42. | 1. | 0. | 0.470261  | -1.501894 | -1.796589 |
| 43. | 1. | 0. | -0.747554 | 1.421148  | 2.111216  |
| 44. | 1. | 0. | 3.374806  | 2.139147  | -0.974118 |
| 45. | 1. | 0. | 3.388067  | 1.374711  | 0.579569  |
| 46. | 1. | 0. | -1.698690 | -2.631250 | -2.446704 |
| 47. | 1. | 0. | -3.106369 | -3.115865 | -1.494205 |
| 48. | 1. | 0. | -1.412244 | -4.833646 | 0.312104  |
| 49. | 1. | 0. | 0.959712  | -3.748277 | 1.321383  |
| 50. | 1. | 0. | -0.332521 | -3.876341 | 2.505481  |
| 51. | 1. | 0. | 0.697511  | -0.045862 | 2.182134  |
| 52. | 1. | 0. | 1.660779  | 0.593916  | -2.755643 |
| 53. | 1. | 0. | 2.661669  | -0.852045 | -3.029976 |
| 54. | 1. | 0. | 3.393577  | 0.758695  | -3.028171 |
| 55. | 1. | 0. | 1.777822  | -2.584516 | 3.517049  |
| 56. | 1. | 0. | 2.237046  | -0.927283 | 3.897237  |
| 57. | 1. | 0. | 0.576756  | -1.480566 | 4.211088  |
| 58. | 1. | 0. | -3.170476 | 1.801588  | 2.371538  |

|     |    |    |           |           |           |
|-----|----|----|-----------|-----------|-----------|
| 59. | 1. | 0. | 2.216104  | 3.486528  | 1.457312  |
| 60. | 1. | 0. | -0.356256 | 4.149969  | 1.788933  |
| 61. | 1. | 0. | 0.742284  | 4.394320  | -1.123421 |
| 62. | 1. | 0. | 1.147427  | 5.482886  | 0.286677  |
| 63. | 1. | 0. | -1.418467 | 3.568768  | -1.557105 |
| 64. | 1. | 0. | -2.546006 | 3.779224  | -0.202921 |
| 65. | 1. | 0. | -2.531529 | 2.266694  | -1.098175 |
| 66. | 1. | 0. | -3.417956 | -0.777839 | -3.349098 |
| 67. | 1. | 0. | -1.687033 | -0.481993 | -3.277373 |
| 68. | 1. | 0. | -2.828068 | 0.755592  | -2.705570 |
| 69. | 1. | 0. | -6.044884 | 1.645222  | -0.468757 |
| 70. | 1. | 0. | -6.555583 | -0.025295 | -0.883039 |
| 71. | 1. | 0. | -5.857764 | 0.313056  | 0.719435  |
| 72. | 1. | 0. | 7.239044  | 0.726920  | -0.345641 |
| 73. | 1. | 0. | 6.700686  | -0.899655 | 0.188041  |
| 74. | 1. | 0. | 6.916985  | -0.568731 | -1.546213 |

| Conformer 3d  |      | Standard Orientation<br>(Ångstroms) |           |           |           |
|---------------|------|-------------------------------------|-----------|-----------|-----------|
| Center number | Atom | Type                                | X         | Y         | Z         |
| 1.            | 6.   | 0.                                  | -0.808292 | 2.729011  | 0.164016  |
| 2.            | 6.   | 0.                                  | 0.258660  | 1.749361  | -0.340107 |
| 3.            | 6.   | 0.                                  | 1.507906  | 2.141697  | -0.013464 |
| 4.            | 6.   | 0.                                  | -1.551302 | 1.948078  | 1.265935  |
| 5.            | 6.   | 0.                                  | -2.151922 | 0.632472  | 0.735158  |
| 6.            | 6.   | 0.                                  | -0.214567 | 0.512403  | -1.041831 |
| 7.            | 6.   | 0.                                  | -1.499581 | -0.136716 | -0.399817 |
| 8.            | 6.   | 0.                                  | 2.862670  | 1.514036  | -0.209670 |
| 9.            | 6.   | 0.                                  | 2.981139  | 0.135961  | -0.899371 |
| 10.           | 6.   | 0.                                  | 1.996796  | -0.919001 | -0.292582 |
| 11.           | 6.   | 0.                                  | 0.554290  | -0.825713 | -0.822980 |
| 12.           | 6.   | 0.                                  | -0.601053 | -1.359727 | 0.095960  |
| 13.           | 6.   | 0.                                  | -0.268604 | -1.662834 | 1.573243  |
| 14.           | 6.   | 0.                                  | -2.539916 | -0.812384 | -1.448327 |
| 15.           | 6.   | 0.                                  | -1.293090 | -2.606150 | -0.364238 |
| 16.           | 6.   | 0.                                  | -2.113640 | -2.319847 | -1.576280 |
| 17.           | 6.   | 0.                                  | -1.078853 | -3.635445 | 0.458070  |
| 18.           | 6.   | 0.                                  | -0.187603 | -3.222923 | 1.611001  |
| 19.           | 6.   | 0.                                  | 0.951221  | -0.910875 | 2.137373  |
| 20.           | 6.   | 0.                                  | 2.171755  | -1.001457 | 1.231812  |
| 21.           | 8.   | 0.                                  | 3.296156  | -1.123618 | 1.690812  |
| 22.           | 6.   | 0.                                  | 2.788279  | 0.261502  | -2.431757 |

|     |    |    |           |           |           |
|-----|----|----|-----------|-----------|-----------|
| 23. | 6. | 0. | 1.278444  | -1.278131 | 3.586850  |
| 24. | 8. | 0. | -2.560315 | 2.713521  | 1.880764  |
| 25. | 6. | 0. | 1.474843  | 3.472594  | 0.681456  |
| 26. | 6. | 0. | 0.017143  | 3.872797  | 0.763501  |
| 27. | 6. | 0. | 0.948978  | 4.633066  | -0.142675 |
| 28. | 6. | 0. | -1.817291 | 3.228077  | -0.888587 |
| 29. | 8. | 0. | -3.131991 | 0.196981  | 1.326930  |
| 30. | 6. | 0. | -2.537566 | -0.154608 | -2.844297 |
| 31. | 6. | 0. | -3.988558 | -0.660568 | -0.939630 |
| 32. | 8. | 0. | -4.475082 | -1.772822 | -0.360622 |
| 33. | 8. | 0. | -4.641754 | 0.348843  | -1.104125 |
| 34. | 6. | 0. | -5.789167 | -1.637645 | 0.205968  |
| 35. | 1. | 0. | -1.143586 | -1.384429 | 2.173143  |
| 36. | 6. | 0. | 4.437743  | -0.334985 | -0.708614 |
| 37. | 8. | 0. | 4.605148  | -1.619463 | -1.098841 |
| 38. | 8. | 0. | 5.354008  | 0.371873  | -0.352233 |
| 39. | 6. | 0. | 5.936944  | -2.135445 | -0.942024 |
| 40. | 1. | 0. | -0.352880 | 0.747256  | -2.101343 |
| 41. | 1. | 0. | 2.370623  | -1.895720 | -0.624737 |
| 42. | 1. | 0. | 0.533503  | -1.375686 | -1.768997 |
| 43. | 1. | 0. | -0.796115 | 1.652084  | 2.018274  |
| 44. | 1. | 0. | 3.496320  | 2.226560  | -0.753341 |
| 45. | 1. | 0. | 3.340702  | 1.442308  | 0.774941  |
| 46. | 1. | 0. | -1.503219 | -2.429560 | -2.482707 |
| 47. | 1. | 0. | -2.973784 | -2.980810 | -1.686625 |
| 48. | 1. | 0. | -1.477667 | -4.638745 | 0.344019  |
| 49. | 1. | 0. | 0.845088  | -3.577754 | 1.468222  |
| 50. | 1. | 0. | -0.519615 | -3.628630 | 2.573019  |
| 51. | 1. | 0. | 0.699541  | 0.160930  | 2.102935  |
| 52. | 1. | 0. | 1.832964  | 0.728655  | -2.678453 |
| 53. | 1. | 0. | 2.840031  | -0.715761 | -2.919325 |
| 54. | 1. | 0. | 3.578711  | 0.891118  | -2.852550 |
| 55. | 1. | 0. | 1.572358  | -2.328217 | 3.672936  |
| 56. | 1. | 0. | 2.109266  | -0.676964 | 3.960591  |
| 57. | 1. | 0. | 0.406932  | -1.111869 | 4.227819  |
| 58. | 1. | 0. | -3.253665 | 2.076568  | 2.126359  |
| 59. | 1. | 0. | 2.190326  | 3.670937  | 1.475301  |
| 60. | 1. | 0. | -0.387648 | 4.383803  | 1.630877  |
| 61. | 1. | 0. | 0.881772  | 4.499618  | -1.218698 |
| 62. | 1. | 0. | 1.223812  | 5.636237  | 0.170684  |
| 63. | 1. | 0. | -1.307085 | 3.694142  | -1.735548 |
| 64. | 1. | 0. | -2.478790 | 3.966771  | -0.430420 |
| 65. | 1. | 0. | -2.455459 | 2.425081  | -1.269691 |

|     |    |    |           |           |           |
|-----|----|----|-----------|-----------|-----------|
| 66. | 1. | 0. | -3.280566 | -0.650849 | -3.477045 |
| 67. | 1. | 0. | -1.569528 | -0.265277 | -3.338346 |
| 68. | 1. | 0. | -2.803047 | 0.901945  | -2.799807 |
| 69. | 1. | 0. | -5.776381 | -0.878462 | 0.990622  |
| 70. | 1. | 0. | -6.512902 | -1.351527 | -0.560615 |
| 71. | 1. | 0. | -6.032185 | -2.616051 | 0.619912  |
| 72. | 1. | 0. | 5.903294  | -3.157700 | -1.318745 |
| 73. | 1. | 0. | 6.652827  | -1.538088 | -1.511283 |
| 74. | 1. | 0. | 6.221853  | -2.124046 | 0.112574  |

| Conformer 3e  |      | Standard Orientation<br>(Ångstroms) |           |           |           |
|---------------|------|-------------------------------------|-----------|-----------|-----------|
| Center number | Atom | Type                                | X         | Y         | Z         |
| 1.            | 6.   | 0.                                  | -0.557746 | 2.723271  | 0.248256  |
| 2.            | 6.   | 0.                                  | 0.398011  | 1.665116  | -0.316663 |
| 3.            | 6.   | 0.                                  | 1.687919  | 1.930381  | -0.017651 |
| 4.            | 6.   | 0.                                  | -1.355366 | 1.978473  | 1.335639  |
| 5.            | 6.   | 0.                                  | -2.094639 | 0.748366  | 0.771025  |
| 6.            | 6.   | 0.                                  | -0.209764 | 0.505092  | -1.047102 |
| 7.            | 6.   | 0.                                  | -1.543692 | -0.039570 | -0.405156 |
| 8.            | 6.   | 0.                                  | 2.979219  | 1.198929  | -0.287631 |
| 9.            | 6.   | 0.                                  | 2.935559  | -0.185381 | -0.975854 |
| 10.           | 6.   | 0.                                  | 1.855708  | -1.120795 | -0.342844 |
| 11.           | 6.   | 0.                                  | 0.434117  | -0.903715 | -0.880775 |
| 12.           | 6.   | 0.                                  | -0.763936 | -1.369479 | 0.016958  |
| 13.           | 6.   | 0.                                  | -0.459298 | -1.792971 | 1.468554  |
| 14.           | 6.   | 0.                                  | -2.663742 | -0.561721 | -1.460287 |
| 15.           | 6.   | 0.                                  | -1.561889 | -2.520055 | -0.515767 |
| 16.           | 6.   | 0.                                  | -2.356784 | -2.084168 | -1.699466 |
| 17.           | 6.   | 0.                                  | -1.420491 | -3.617362 | 0.230534  |
| 18.           | 6.   | 0.                                  | -0.489408 | -3.353510 | 1.396734  |
| 19.           | 6.   | 0.                                  | 0.797261  | -1.160677 | 2.088633  |
| 20.           | 6.   | 0.                                  | 2.023690  | -1.180095 | 1.181105  |
| 21.           | 8.   | 0.                                  | 3.148525  | -1.219135 | 1.655112  |
| 22.           | 6.   | 0.                                  | 2.723523  | -0.034837 | -2.503744 |
| 23.           | 6.   | 0.                                  | 1.114829  | -1.680660 | 3.494853  |
| 24.           | 8.   | 0.                                  | -2.272372 | 2.816521  | 1.997864  |
| 25.           | 6.   | 0.                                  | 1.796742  | 3.230074  | 0.727294  |
| 26.           | 6.   | 0.                                  | 0.385840  | 3.759763  | 0.868090  |
| 27.           | 6.   | 0.                                  | 1.361655  | 4.468508  | -0.033784 |
| 28.           | 6.   | 0.                                  | -1.531037 | 3.356952  | -0.765085 |
| 29.           | 8.   | 0.                                  | -3.103181 | 0.394388  | 1.369111  |

|     |    |    |           |           |           |
|-----|----|----|-----------|-----------|-----------|
| 30. | 6. | 0. | -2.656677 | 0.184914  | -2.809903 |
| 31. | 6. | 0. | -4.081391 | -0.350097 | -0.888915 |
| 32. | 8. | 0. | -4.596617 | -1.453398 | -0.316541 |
| 33. | 8. | 0. | -4.690641 | 0.693122  | -1.000493 |
| 34. | 6. | 0. | -5.875033 | -1.270216 | 0.313759  |
| 35. | 1. | 0. | -1.320525 | -1.498875 | 2.081189  |
| 36. | 6. | 0. | 4.285402  | -0.922221 | -0.853705 |
| 37. | 8. | 0. | 5.305333  | -0.110192 | -0.517600 |
| 38. | 8. | 0. | 4.433479  | -2.094494 | -1.131605 |
| 39. | 6. | 0. | 6.587842  | -0.751979 | -0.412484 |
| 40. | 1. | 0. | -0.340792 | 0.786300  | -2.096292 |
| 41. | 1. | 0. | 2.143845  | -2.136498 | -0.651955 |
| 42. | 1. | 0. | 0.378024  | -1.418448 | -1.844574 |
| 43. | 1. | 0. | -0.621522 | 1.581075  | 2.061985  |
| 44. | 1. | 0. | 3.628510  | 1.863627  | -0.872925 |
| 45. | 1. | 0. | 3.496180  | 1.091580  | 0.671846  |
| 46. | 1. | 0. | -1.755242 | -2.174539 | -2.614097 |
| 47. | 1. | 0. | -3.266351 | -2.665625 | -1.854361 |
| 48. | 1. | 0. | -1.893235 | -4.578248 | 0.052339  |
| 49. | 1. | 0. | 0.512858  | -3.770248 | 1.211173  |
| 50. | 1. | 0. | -0.838862 | -3.801440 | 2.333550  |
| 51. | 1. | 0. | 0.592537  | -0.081490 | 2.172286  |
| 52. | 1. | 0. | 1.817458  | 0.529832  | -2.731328 |
| 53. | 1. | 0. | 2.667181  | -1.012951 | -2.988866 |
| 54. | 1. | 0. | 3.566892  | 0.510113  | -2.940133 |
| 55. | 1. | 0. | 1.365205  | -2.745554 | 3.476767  |
| 56. | 1. | 0. | 1.970449  | -1.151076 | 3.916649  |
| 57. | 1. | 0. | 0.252912  | -1.543214 | 4.155261  |
| 58. | 1. | 0. | -3.020788 | 2.242017  | 2.236223  |
| 59. | 1. | 0. | 2.546774  | 3.327341  | 1.508078  |
| 60. | 1. | 0. | 0.052309  | 4.268942  | 1.766308  |
| 61. | 1. | 0. | 1.254656  | 4.389310  | -1.111945 |
| 62. | 1. | 0. | 1.736864  | 5.427665  | 0.311828  |
| 63. | 1. | 0. | -0.992878 | 3.800063  | -1.606957 |
| 64. | 1. | 0. | -2.108346 | 4.139982  | -0.268368 |
| 65. | 1. | 0. | -2.250829 | 2.634009  | -1.159971 |
| 66. | 1. | 0. | -3.449587 | -0.218622 | -3.447805 |
| 67. | 1. | 0. | -1.713239 | 0.043733  | -3.342073 |
| 68. | 1. | 0. | -2.849604 | 1.251216  | -2.691252 |
| 69. | 1. | 0. | -6.148615 | -2.247175 | 0.711853  |
| 70. | 1. | 0. | -5.788158 | -0.536040 | 1.117342  |
| 71. | 1. | 0. | -6.617222 | -0.926298 | -0.410285 |
| 72. | 1. | 0. | 7.290445  | 0.038005  | -0.148067 |

|     |    |    |          |           |           |
|-----|----|----|----------|-----------|-----------|
| 73. | 1. | 0. | 6.561519 | -1.519746 | 0.363926  |
| 74. | 1. | 0. | 6.866407 | -1.215203 | -1.361832 |

**Table S3.** Gibbs free energies<sup>a</sup> and equilibrium populations<sup>b</sup> of low-energy conformers of 1*S*, 3*R*, 6*S*, 7*R*, 9*S*, 10*R*, 11*S*, 1'*R*, 5'*S*, 6'*R*, 7'*R*, 9'*S*, 10'*S* - **3**.

| Conformers | In gas            |                      |
|------------|-------------------|----------------------|
|            | $G^a$             | $P$ (%) <sup>b</sup> |
| <b>3-f</b> | -1084934.73980112 | 15.60                |
| <b>3-g</b> | -1084934.91299388 | 20.91                |
| <b>3-h</b> | -1084935.02782821 | 25.38                |
| <b>3-i</b> | -1084934.7448212  | 15.74                |
| <b>3-j</b> | -1084934.95315452 | 22.37                |

<sup>a</sup>B3LYP/6-31G(d,p), in kcal/mol. <sup>b</sup>From  $G$  values at 298.15K.

**Figure S5.** The low-energy reoptimized MMFF conformers of 1*S*, 3*R*, 6*S*, 7*R*, 9*S*, 10*R*, 11*S*, 1'*R*, 5'*S*, 6'*R*, 7'*R*, 9'*S*, 10'*S* - **3** at B3LYP/6-31G(d,p) level of theory in gas.

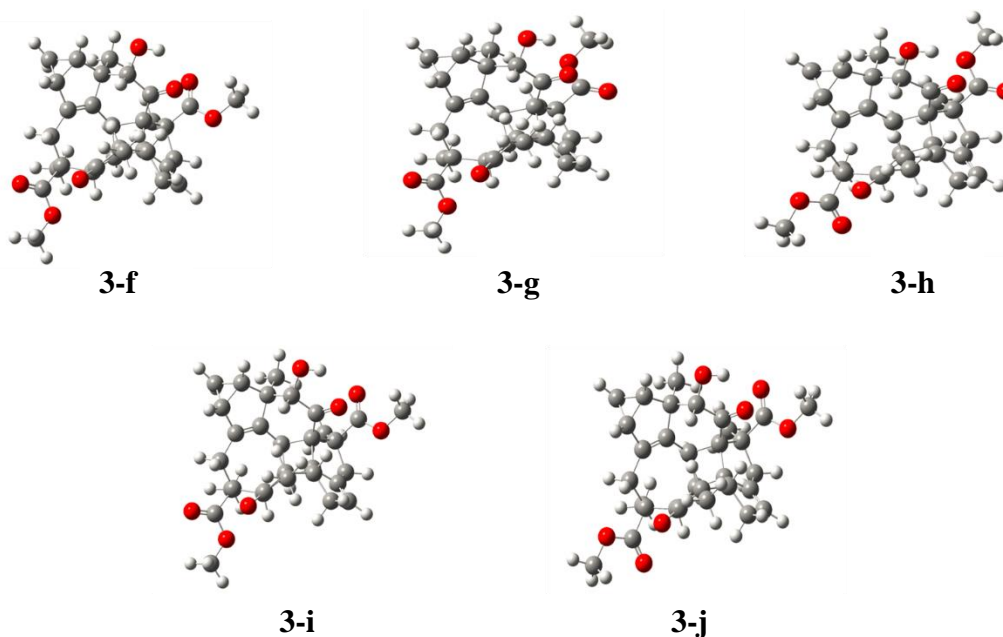

**Table S4.** Cartesian coordinates for the low-energy reoptimized MMFF conformers of 1*S*, 3*R*, 6*S*, 7*R*, 9*S*, 10*R*, 11*S*, 1'*R*, 5'*S*, 6'*R*, 7'*R*, 9'*S*, 10'*S* - **3** at B3LYP/6-31G (d, p) level of theory in gas.

| Conformer <b>3f</b> |      | Standard Orientation<br>(Ångstroms) |           |          |           |
|---------------------|------|-------------------------------------|-----------|----------|-----------|
| Center number       | Atom | Type                                | X         | Y        | Z         |
| 1.                  | 6.   | 0.                                  | -0.808171 | 2.729111 | -0.164050 |



|     |    |    |           |           |           |
|-----|----|----|-----------|-----------|-----------|
| 2.  | 6. | 0. | 0.258743  | 1.749431  | 0.340100  |
| 3.  | 6. | 0. | 1.508003  | 2.141718  | 0.013441  |
| 4.  | 6. | 0. | -1.551175 | 1.948177  | -1.265960 |
| 5.  | 6. | 0. | -2.151833 | 0.632579  | -0.735180 |
| 6.  | 6. | 0. | -0.214531 | 0.512516  | 1.041858  |
| 7.  | 6. | 0. | -1.499584 | -0.136586 | 0.399873  |
| 8.  | 6. | 0. | 2.862742  | 1.513995  | 0.209593  |
| 9.  | 6. | 0. | 2.981177  | 0.135913  | 0.899284  |
| 10. | 6. | 0. | 1.996743  | -0.918989 | 0.292548  |
| 11. | 6. | 0. | 0.554286  | -0.825630 | 0.823064  |
| 12. | 6. | 0. | -0.601114 | -1.359712 | -0.095740 |
| 13. | 6. | 0. | -0.268774 | -1.663077 | -1.572990 |
| 14. | 6. | 0. | -2.540006 | -0.812081 | 1.448422  |
| 15. | 6. | 0. | -1.293154 | -2.606036 | 0.364714  |
| 16. | 6. | 0. | -2.113632 | -2.319478 | 1.576748  |
| 17. | 6. | 0. | -1.078981 | -3.635476 | -0.457430 |
| 18. | 6. | 0. | -0.187780 | -3.223166 | -1.610480 |
| 19. | 6. | 0. | 0.950972  | -0.911162 | -2.137330 |
| 20. | 6. | 0. | 2.171595  | -1.001491 | -1.231850 |
| 21. | 8. | 0. | 3.295979  | -1.123507 | -1.690940 |
| 22. | 6. | 0. | 2.788398  | 0.261467  | 2.431680  |
| 23. | 6. | 0. | 1.278109  | -1.278617 | -3.586770 |
| 24. | 8. | 0. | -2.560178 | 2.713656  | -1.880770 |
| 25. | 6. | 0. | 1.474982  | 3.472612  | -0.681490 |
| 26. | 6. | 0. | 0.017305  | 3.872867  | -0.763540 |
| 27. | 6. | 0. | 0.949167  | 4.633106  | 0.142640  |
| 28. | 6. | 0. | -1.817178 | 3.228242  | 0.888520  |
| 29. | 8. | 0. | -3.131873 | 0.197088  | -1.327010 |
| 30. | 6. | 0. | -2.537877 | -0.153975 | 2.844226  |
| 31. | 6. | 0. | -3.988590 | -0.660553 | 0.939479  |
| 32. | 8. | 0. | -4.474788 | -1.772929 | 0.360435  |
| 33. | 8. | 0. | -4.642023 | 0.348728  | 1.103841  |
| 34. | 6. | 0. | -5.788792 | -1.638033 | -0.206410 |
| 35. | 1. | 0. | -1.143814 | -1.384781 | -2.172860 |
| 36. | 6. | 0. | 4.437758  | -0.335095 | 0.708467  |
| 37. | 8. | 0. | 4.605094  | -1.619622 | 1.098565  |
| 38. | 8. | 0. | 5.354063  | 0.371753  | 0.352166  |
| 39. | 6. | 0. | 5.936875  | -2.135649 | 0.941791  |
| 40. | 1. | 0. | -0.352823 | 0.747408  | 2.101362  |
| 41. | 1. | 0. | 2.370525  | -1.895737 | 0.624678  |
| 42. | 1. | 0. | 0.533590  | -1.375515 | 1.769134  |
| 43. | 1. | 0. | -0.795999 | 1.652170  | -2.018300 |
| 44. | 1. | 0. | 3.496456  | 2.226489  | 0.753229  |

|     |    |    |           |           |           |
|-----|----|----|-----------|-----------|-----------|
| 45. | 1. | 0. | 3.340718  | 1.442241  | -0.775050 |
| 46. | 1. | 0. | -1.503124 | -2.428903 | 2.483149  |
| 47. | 1. | 0. | -2.973719 | -2.980477 | 1.687352  |
| 48. | 1. | 0. | -1.477811 | -4.638747 | -0.343190 |
| 49. | 1. | 0. | 0.844914  | -3.577981 | -1.467670 |
| 50. | 1. | 0. | -0.519832 | -3.629049 | -2.572410 |
| 51. | 1. | 0. | 0.699236  | 0.160638  | -2.103030 |
| 52. | 1. | 0. | 1.833108  | 0.728646  | 2.678426  |
| 53. | 1. | 0. | 2.840150  | -0.715796 | 2.919248  |
| 54. | 1. | 0. | 3.578869  | 0.891064  | 2.852427  |
| 55. | 1. | 0. | 1.571970  | -2.328730 | -3.672730 |
| 56. | 1. | 0. | 2.108938  | -0.677534 | -3.960630 |
| 57. | 1. | 0. | 0.406569  | -1.112412 | -4.227720 |
| 58. | 1. | 0. | -3.253465 | 2.076689  | -2.126500 |
| 59. | 1. | 0. | 2.190494  | 3.670918  | -1.475310 |
| 60. | 1. | 0. | -0.387475 | 4.383885  | -1.630910 |
| 61. | 1. | 0. | 0.881946  | 4.499688  | 1.218664  |
| 62. | 1. | 0. | 1.224047  | 5.636255  | -0.170750 |
| 63. | 1. | 0. | -1.306972 | 3.694096  | 1.735595  |
| 64. | 1. | 0. | -2.478493 | 3.967126  | 0.430393  |
| 65. | 1. | 0. | -2.455551 | 2.425323  | 1.269452  |
| 66. | 1. | 0. | -3.280939 | -0.650088 | 3.476999  |
| 67. | 1. | 0. | -1.569897 | -0.264469 | 3.338426  |
| 68. | 1. | 0. | -2.803407 | 0.902555  | 2.799440  |
| 69. | 1. | 0. | -5.775970 | -0.878968 | -0.991180 |
| 70. | 1. | 0. | -6.512707 | -1.351900 | 0.559999  |
| 71. | 1. | 0. | -6.031595 | -2.616536 | -0.620250 |
| 72. | 1. | 0. | 5.903383  | -3.157633 | 1.319258  |
| 73. | 1. | 0. | 6.652881  | -1.537823 | 1.510396  |
| 74. | 1. | 0. | 6.221496  | -2.125021 | -0.112900 |

| Conformer <b>3g</b> |      | Standard Orientation<br>(Ångstroms) |           |           |          |
|---------------------|------|-------------------------------------|-----------|-----------|----------|
| Center number       | Atom | Type                                | X         | Y         | Z        |
| 1.                  | 6.   | 0.                                  | -1.100344 | 2.519802  | -0.19792 |
| 2.                  | 6.   | 0.                                  | 0.055670  | 1.655581  | 0.321573 |
| 3.                  | 6.   | 0.                                  | 1.261424  | 2.190722  | 0.039205 |
| 4.                  | 6.   | 0.                                  | -1.738388 | 1.677221  | -1.32074 |
| 5.                  | 6.   | 0.                                  | -2.198176 | 0.294211  | -0.82359 |
| 6.                  | 6.   | 0.                                  | -0.294991 | 0.363239  | 0.995262 |
| 7.                  | 6.   | 0.                                  | -1.479562 | -0.412095 | 0.306672 |
| 8.                  | 6.   | 0.                                  | 2.669800  | 1.716169  | 0.279155 |

|     |    |    |           |           |          |
|-----|----|----|-----------|-----------|----------|
| 9.  | 6. | 0. | 2.917446  | 0.356695  | 0.971849 |
| 10. | 6. | 0. | 2.089929  | -0.803025 | 0.319921 |
| 11. | 6. | 0. | 0.620897  | -0.880052 | 0.777805 |
| 12. | 6. | 0. | -0.430162 | -1.499195 | -0.21303 |
| 13. | 6. | 0. | -0.006407 | -1.675529 | -1.69096 |
| 14. | 6. | 0. | -2.442772 | -1.243157 | 1.308069 |
| 15. | 6. | 0. | -1.008596 | -2.835557 | 0.137859 |
| 16. | 6. | 0. | -1.932189 | -2.727052 | 1.304715 |
| 17. | 6. | 0. | -0.658557 | -3.783595 | -0.73432 |
| 18. | 6. | 0. | 0.232003  | -3.214860 | -1.8174  |
| 19. | 6. | 0. | 1.161740  | -0.784208 | -2.15397 |
| 20. | 6. | 0. | 2.342160  | -0.841329 | -1.19625 |
| 21. | 8. | 0. | 3.492316  | -0.898890 | -1.60052 |
| 22. | 6. | 0. | 2.648388  | 0.448052  | 2.494735 |
| 23. | 6. | 0. | 1.582052  | -1.032825 | -3.60465 |
| 24. | 8. | 0. | -2.818936 | 2.336821  | -1.93963 |
| 25. | 6. | 0. | 1.100360  | 3.514241  | -0.6524  |
| 26. | 6. | 0. | -0.390196 | 3.751589  | -0.77257 |
| 27. | 6. | 0. | 0.429340  | 4.607033  | 0.157797 |
| 28. | 6. | 0. | -2.165854 | 2.897998  | 0.848711 |
| 29. | 8. | 0. | -3.108944 | -0.243638 | -1.44202 |
| 30. | 6. | 0. | -2.447196 | -0.705700 | 2.759705 |
| 31. | 6. | 0. | -3.918217 | -1.222425 | 0.855293 |
| 32. | 8. | 0. | -4.443747 | 0.017829  | 0.988349 |
| 33. | 8. | 0. | -4.572844 | -2.185914 | 0.529088 |
| 34. | 6. | 0. | -5.801604 | 0.160043  | 0.538944 |
| 35. | 1. | 0. | -0.877601 | -1.446750 | -2.31663 |
| 36. | 6. | 0. | 4.425488  | 0.057947  | 0.837833 |
| 37. | 8. | 0. | 4.729213  | -1.189562 | 1.262297 |
| 38. | 8. | 0. | 5.263191  | 0.860612  | 0.490821 |
| 39. | 6. | 0. | 6.116106  | -1.549446 | 1.153749 |
| 40. | 1. | 0. | -0.488191 | 0.564785  | 2.05285  |
| 41. | 1. | 0. | 2.561323  | -1.730886 | 0.665117 |
| 42. | 1. | 0. | 0.611457  | -1.460461 | 1.706219 |
| 43. | 1. | 0. | -0.944760 | 1.476906  | -2.06503 |
| 44. | 1. | 0. | 3.202165  | 2.492140  | 0.844288 |
| 45. | 1. | 0. | 3.186350  | 1.703093  | -0.68859 |
| 46. | 1. | 0. | -1.402099 | -2.925316 | 2.24522  |
| 47. | 1. | 0. | -2.771443 | -3.421917 | 1.245328 |
| 48. | 1. | 0. | -0.966850 | -4.824028 | -0.70318 |
| 49. | 1. | 0. | 1.288909  | -3.476601 | -1.65204 |
| 50. | 1. | 0. | -0.022012 | -3.587743 | -2.81572 |
| 51. | 1. | 0. | 0.816824  | 0.257757  | -2.06826 |

|     |    |    |           |           |          |
|-----|----|----|-----------|-----------|----------|
| 52. | 1. | 0. | 1.635747  | 0.798252  | 2.702463 |
| 53. | 1. | 0. | 2.794728  | -0.519939 | 2.981104 |
| 54. | 1. | 0. | 3.341283  | 1.162936  | 2.950098 |
| 55. | 1. | 0. | 1.980534  | -2.042769 | -3.73569 |
| 56. | 1. | 0. | 2.365458  | -0.334714 | -3.90598 |
| 57. | 1. | 0. | 0.725901  | -0.910945 | -4.27568 |
| 58. | 1. | 0. | -3.400753 | 1.624880  | -2.25821 |
| 59. | 1. | 0. | 1.809519  | 3.792783  | -1.42775 |
| 60. | 1. | 0. | -0.824717 | 4.218947  | -1.65022 |
| 61. | 1. | 0. | 0.350371  | 4.466252  | 1.232191 |
| 62. | 1. | 0. | 0.599887  | 5.635078  | -0.14914 |
| 63. | 1. | 0. | -1.718524 | 3.448622  | 1.68013  |
| 64. | 1. | 0. | -2.923182 | 3.531133  | 0.379991 |
| 65. | 1. | 0. | -2.682953 | 2.023124  | 1.253131 |
| 66. | 1. | 0. | -3.161682 | -1.284146 | 3.355129 |
| 67. | 1. | 0. | -1.468367 | -0.827258 | 3.230631 |
| 68. | 1. | 0. | -2.741332 | 0.343304  | 2.816203 |
| 69. | 1. | 0. | -6.067627 | 1.199135  | 0.731314 |
| 70. | 1. | 0. | -6.461171 | -0.516213 | 1.087044 |
| 71. | 1. | 0. | -5.865576 | -0.062619 | -0.52851 |
| 72. | 1. | 0. | 6.190367  | -2.560527 | 1.553975 |
| 73. | 1. | 0. | 6.740267  | -0.860634 | 1.727604 |
| 74. | 1. | 0. | 6.428217  | -1.526685 | 0.107136 |

| Conformer 3h  |             | Standard Orientation<br>(Ångstroms) |           |           |          |
|---------------|-------------|-------------------------------------|-----------|-----------|----------|
| Center number | Atom number | Type                                | X         | Y         | Z        |
| 1.            | 6.          | 0.                                  | -0.839936 | 2.543284  | -0.28671 |
| 2.            | 6.          | 0.                                  | 0.210837  | 1.591287  | 0.299869 |
| 3.            | 6.          | 0.                                  | 1.472026  | 1.999950  | 0.043888 |
| 4.            | 6.          | 0.                                  | -1.532523 | 1.725396  | -1.39386 |
| 5.            | 6.          | 0.                                  | -2.142701 | 0.415076  | -0.85665 |
| 6.            | 6.          | 0.                                  | -0.286093 | 0.365642  | 1.006557 |
| 7.            | 6.          | 0.                                  | -1.535206 | -0.310745 | 0.326581 |
| 8.            | 6.          | 0.                                  | 2.825724  | 1.413459  | 0.359347 |
| 9.            | 6.          | 0.                                  | 2.910402  | 0.024664  | 1.035564 |
| 10.           | 6.          | 0.                                  | 1.963248  | -1.017137 | 0.355621 |
| 11.           | 6.          | 0.                                  | 0.507786  | -0.965493 | 0.843368 |
| 12.           | 6.          | 0.                                  | -0.602508 | -1.535054 | -0.10748 |
| 13.           | 6.          | 0.                                  | -0.202259 | -1.873382 | -1.56067 |
| 14.           | 6.          | 0.                                  | -2.605527 | -0.972840 | 1.346254 |
| 15.           | 6.          | 0.                                  | -1.303762 | -2.779081 | 0.345908 |

|     |    |    |           |           |          |
|-----|----|----|-----------|-----------|----------|
| 16. | 6. | 0. | -2.215517 | -2.485941 | 1.489171 |
| 17. | 6. | 0. | -1.022135 | -3.827655 | -0.43063 |
| 18. | 6. | 0. | -0.071774 | -3.429940 | -1.53963 |
| 19. | 6. | 0. | 1.005567  | -1.101339 | -2.1168  |
| 20. | 6. | 0. | 2.192566  | -1.030368 | -1.16204 |
| 21. | 8. | 0. | 3.334148  | -0.958569 | -1.59006 |
| 22. | 6. | 0. | 2.629608  | 0.132531  | 2.555887 |
| 23. | 6. | 0. | 1.423540  | -1.549565 | -3.52107 |
| 24. | 8. | 0. | -2.528335 | 2.464656  | -2.0636  |
| 25. | 6. | 0. | 1.459442  | 3.306017  | -0.69804 |
| 26. | 6. | 0. | 0.003466  | 3.678057  | -0.88047 |
| 27. | 6. | 0. | 0.869933  | 4.487494  | 0.048642 |
| 28. | 6. | 0. | -1.892913 | 3.065560  | 0.710734 |
| 29. | 8. | 0. | -3.085043 | -0.053171 | -1.48399 |
| 30. | 6. | 0. | -2.628195 | -0.315772 | 2.747192 |
| 31. | 6. | 0. | -4.052035 | -0.885517 | 0.813759 |
| 32. | 8. | 0. | -4.507874 | 0.387847  | 0.8626   |
| 33. | 8. | 0. | -4.745177 | -1.823490 | 0.492475 |
| 34. | 6. | 0. | -5.831528 | 0.584538  | 0.338266 |
| 35. | 1. | 0. | -1.066553 | -1.650294 | -2.19825 |
| 36. | 6. | 0. | 4.336774  | -0.558448 | 0.957327 |
| 37. | 8. | 0. | 5.271461  | 0.361700  | 0.653332 |
| 38. | 8. | 0. | 4.603797  | -1.707852 | 1.241333 |
| 39. | 6. | 0. | 6.619120  | -0.135860 | 0.588444 |
| 40. | 1. | 0. | -0.470520 | 0.619989  | 2.05443  |
| 41. | 1. | 0. | 2.351553  | -1.998894 | 0.663556 |
| 42. | 1. | 0. | 0.470261  | -1.501894 | 1.796589 |
| 43. | 1. | 0. | -0.747554 | 1.421148  | -2.11122 |
| 44. | 1. | 0. | 3.374806  | 2.139147  | 0.974118 |
| 45. | 1. | 0. | 3.388067  | 1.374711  | -0.57957 |
| 46. | 1. | 0. | -1.698690 | -2.631250 | 2.446704 |
| 47. | 1. | 0. | -3.106369 | -3.115865 | 1.494205 |
| 48. | 1. | 0. | -1.412244 | -4.833646 | -0.3121  |
| 49. | 1. | 0. | 0.959712  | -3.748277 | -1.32138 |
| 50. | 1. | 0. | -0.332521 | -3.876341 | -2.50548 |
| 51. | 1. | 0. | 0.697511  | -0.045862 | -2.18213 |
| 52. | 1. | 0. | 1.660779  | 0.593916  | 2.755643 |
| 53. | 1. | 0. | 2.661669  | -0.852045 | 3.029976 |
| 54. | 1. | 0. | 3.393577  | 0.758695  | 3.028171 |
| 55. | 1. | 0. | 1.777822  | -2.584516 | -3.51705 |
| 56. | 1. | 0. | 2.237046  | -0.927283 | -3.89724 |
| 57. | 1. | 0. | 0.576756  | -1.480566 | -4.21109 |
| 58. | 1. | 0. | -3.170476 | 1.801588  | -2.37154 |

|     |    |    |           |           |          |
|-----|----|----|-----------|-----------|----------|
| 59. | 1. | 0. | 2.216104  | 3.486528  | -1.45731 |
| 60. | 1. | 0. | -0.356256 | 4.149969  | -1.78893 |
| 61. | 1. | 0. | 0.742284  | 4.394320  | 1.123421 |
| 62. | 1. | 0. | 1.147427  | 5.482886  | -0.28668 |
| 63. | 1. | 0. | -1.418467 | 3.568768  | 1.557105 |
| 64. | 1. | 0. | -2.546006 | 3.779224  | 0.202921 |
| 65. | 1. | 0. | -2.531529 | 2.266694  | 1.098175 |
| 66. | 1. | 0. | -3.417956 | -0.777839 | 3.349098 |
| 67. | 1. | 0. | -1.687033 | -0.481993 | 3.277373 |
| 68. | 1. | 0. | -2.828068 | 0.755592  | 2.70557  |
| 69. | 1. | 0. | -6.044884 | 1.645222  | 0.468757 |
| 70. | 1. | 0. | -6.555583 | -0.025295 | 0.883039 |
| 71. | 1. | 0. | -5.857764 | 0.313056  | -0.71944 |
| 72. | 1. | 0. | 7.239044  | 0.726920  | 0.345641 |
| 73. | 1. | 0. | 6.700686  | -0.899655 | -0.18804 |
| 74. | 1. | 0. | 6.916985  | -0.568731 | 1.546213 |

| Conformer 3i  |      | Standard Orientation<br>(Ångstroms) |           |           |          |
|---------------|------|-------------------------------------|-----------|-----------|----------|
| Center number | Atom | Type                                | X         | Y         | Z        |
| 1.            | 6.   | 0.                                  | -0.808292 | 2.729011  | -0.16402 |
| 2.            | 6.   | 0.                                  | 0.258660  | 1.749361  | 0.340107 |
| 3.            | 6.   | 0.                                  | 1.507906  | 2.141697  | 0.013464 |
| 4.            | 6.   | 0.                                  | -1.551302 | 1.948078  | -1.26594 |
| 5.            | 6.   | 0.                                  | -2.151922 | 0.632472  | -0.73516 |
| 6.            | 6.   | 0.                                  | -0.214567 | 0.512403  | 1.041831 |
| 7.            | 6.   | 0.                                  | -1.499581 | -0.136716 | 0.399817 |
| 8.            | 6.   | 0.                                  | 2.862670  | 1.514036  | 0.20967  |
| 9.            | 6.   | 0.                                  | 2.981139  | 0.135961  | 0.899371 |
| 10.           | 6.   | 0.                                  | 1.996796  | -0.919001 | 0.292582 |
| 11.           | 6.   | 0.                                  | 0.554290  | -0.825713 | 0.82298  |
| 12.           | 6.   | 0.                                  | -0.601053 | -1.359727 | -0.09596 |
| 13.           | 6.   | 0.                                  | -0.268604 | -1.662834 | -1.57324 |
| 14.           | 6.   | 0.                                  | -2.539916 | -0.812384 | 1.448327 |
| 15.           | 6.   | 0.                                  | -1.293090 | -2.606150 | 0.364238 |
| 16.           | 6.   | 0.                                  | -2.113640 | -2.319847 | 1.57628  |
| 17.           | 6.   | 0.                                  | -1.078853 | -3.635445 | -0.45807 |
| 18.           | 6.   | 0.                                  | -0.187603 | -3.222923 | -1.611   |
| 19.           | 6.   | 0.                                  | 0.951221  | -0.910875 | -2.13737 |
| 20.           | 6.   | 0.                                  | 2.171755  | -1.001457 | -1.23181 |
| 21.           | 8.   | 0.                                  | 3.296156  | -1.123618 | -1.69081 |
| 22.           | 6.   | 0.                                  | 2.788279  | 0.261502  | 2.431757 |

|     |    |    |           |           |          |
|-----|----|----|-----------|-----------|----------|
| 23. | 6. | 0. | 1.278444  | -1.278131 | -3.58685 |
| 24. | 8. | 0. | -2.560315 | 2.713521  | -1.88076 |
| 25. | 6. | 0. | 1.474843  | 3.472594  | -0.68146 |
| 26. | 6. | 0. | 0.017143  | 3.872797  | -0.7635  |
| 27. | 6. | 0. | 0.948978  | 4.633066  | 0.142675 |
| 28. | 6. | 0. | -1.817291 | 3.228077  | 0.888587 |
| 29. | 8. | 0. | -3.131991 | 0.196981  | -1.32693 |
| 30. | 6. | 0. | -2.537566 | -0.154608 | 2.844297 |
| 31. | 6. | 0. | -3.988558 | -0.660568 | 0.93963  |
| 32. | 8. | 0. | -4.475082 | -1.772822 | 0.360622 |
| 33. | 8. | 0. | -4.641754 | 0.348843  | 1.104125 |
| 34. | 6. | 0. | -5.789167 | -1.637645 | -0.20597 |
| 35. | 1. | 0. | -1.143586 | -1.384429 | -2.17314 |
| 36. | 6. | 0. | 4.437743  | -0.334985 | 0.708614 |
| 37. | 8. | 0. | 4.605148  | -1.619463 | 1.098841 |
| 38. | 8. | 0. | 5.354008  | 0.371873  | 0.352233 |
| 39. | 6. | 0. | 5.936944  | -2.135445 | 0.942024 |
| 40. | 1. | 0. | -0.352880 | 0.747256  | 2.101343 |
| 41. | 1. | 0. | 2.370623  | -1.895720 | 0.624737 |
| 42. | 1. | 0. | 0.533503  | -1.375686 | 1.768997 |
| 43. | 1. | 0. | -0.796115 | 1.652084  | -2.01827 |
| 44. | 1. | 0. | 3.496320  | 2.226560  | 0.753341 |
| 45. | 1. | 0. | 3.340702  | 1.442308  | -0.77494 |
| 46. | 1. | 0. | -1.503219 | -2.429560 | 2.482707 |
| 47. | 1. | 0. | -2.973784 | -2.980810 | 1.686625 |
| 48. | 1. | 0. | -1.477667 | -4.638745 | -0.34402 |
| 49. | 1. | 0. | 0.845088  | -3.577754 | -1.46822 |
| 50. | 1. | 0. | -0.519615 | -3.628630 | -2.57302 |
| 51. | 1. | 0. | 0.699541  | 0.160930  | -2.10294 |
| 52. | 1. | 0. | 1.832964  | 0.728655  | 2.678453 |
| 53. | 1. | 0. | 2.840031  | -0.715761 | 2.919325 |
| 54. | 1. | 0. | 3.578711  | 0.891118  | 2.85255  |
| 55. | 1. | 0. | 1.572358  | -2.328217 | -3.67294 |
| 56. | 1. | 0. | 2.109266  | -0.676964 | -3.96059 |
| 57. | 1. | 0. | 0.406932  | -1.111869 | -4.22782 |
| 58. | 1. | 0. | -3.253665 | 2.076568  | -2.12636 |
| 59. | 1. | 0. | 2.190326  | 3.670937  | -1.4753  |
| 60. | 1. | 0. | -0.387648 | 4.383803  | -1.63088 |
| 61. | 1. | 0. | 0.881772  | 4.499618  | 1.218698 |
| 62. | 1. | 0. | 1.223812  | 5.636237  | -0.17068 |
| 63. | 1. | 0. | -1.307085 | 3.694142  | 1.735548 |
| 64. | 1. | 0. | -2.478790 | 3.966771  | 0.43042  |
| 65. | 1. | 0. | -2.455459 | 2.425081  | 1.269691 |

|     |    |    |           |           |          |
|-----|----|----|-----------|-----------|----------|
| 66. | 1. | 0. | -3.280566 | -0.650849 | 3.477045 |
| 67. | 1. | 0. | -1.569528 | -0.265277 | 3.338346 |
| 68. | 1. | 0. | -2.803047 | 0.901945  | 2.799807 |
| 69. | 1. | 0. | -5.776381 | -0.878462 | -0.99062 |
| 70. | 1. | 0. | -6.512902 | -1.351527 | 0.560615 |
| 71. | 1. | 0. | -6.032185 | -2.616051 | -0.61991 |
| 72. | 1. | 0. | 5.903294  | -3.157700 | 1.318745 |
| 73. | 1. | 0. | 6.652827  | -1.538088 | 1.511283 |
| 74. | 1. | 0. | 6.221853  | -2.124046 | -0.11257 |

| Conformer <b>3j</b> |      | Standard Orientation<br>(Ångstroms) |           |           |          |
|---------------------|------|-------------------------------------|-----------|-----------|----------|
| Center number       | Atom | Type                                | X         | Y         | Z        |
| 1.                  | 6.   | 0.                                  | -0.557746 | 2.723271  | -0.24826 |
| 2.                  | 6.   | 0.                                  | 0.398011  | 1.665116  | 0.316663 |
| 3.                  | 6.   | 0.                                  | 1.687919  | 1.930381  | 0.017651 |
| 4.                  | 6.   | 0.                                  | -1.355366 | 1.978473  | -1.33564 |
| 5.                  | 6.   | 0.                                  | -2.094639 | 0.748366  | -0.77103 |
| 6.                  | 6.   | 0.                                  | -0.209764 | 0.505092  | 1.047102 |
| 7.                  | 6.   | 0.                                  | -1.543692 | -0.039570 | 0.405156 |
| 8.                  | 6.   | 0.                                  | 2.979219  | 1.198929  | 0.287631 |
| 9.                  | 6.   | 0.                                  | 2.935559  | -0.185381 | 0.975854 |
| 10.                 | 6.   | 0.                                  | 1.855708  | -1.120795 | 0.342844 |
| 11.                 | 6.   | 0.                                  | 0.434117  | -0.903715 | 0.880775 |
| 12.                 | 6.   | 0.                                  | -0.763936 | -1.369479 | -0.01696 |
| 13.                 | 6.   | 0.                                  | -0.459298 | -1.792971 | -1.46855 |
| 14.                 | 6.   | 0.                                  | -2.663742 | -0.561721 | 1.460287 |
| 15.                 | 6.   | 0.                                  | -1.561889 | -2.520055 | 0.515767 |
| 16.                 | 6.   | 0.                                  | -2.356784 | -2.084168 | 1.699466 |
| 17.                 | 6.   | 0.                                  | -1.420491 | -3.617362 | -0.23053 |
| 18.                 | 6.   | 0.                                  | -0.489408 | -3.353510 | -1.39673 |
| 19.                 | 6.   | 0.                                  | 0.797261  | -1.160677 | -2.08863 |
| 20.                 | 6.   | 0.                                  | 2.023690  | -1.180095 | -1.18111 |
| 21.                 | 8.   | 0.                                  | 3.148525  | -1.219135 | -1.65511 |
| 22.                 | 6.   | 0.                                  | 2.723523  | -0.034837 | 2.503744 |
| 23.                 | 6.   | 0.                                  | 1.114829  | -1.680660 | -3.49485 |
| 24.                 | 8.   | 0.                                  | -2.272372 | 2.816521  | -1.99786 |
| 25.                 | 6.   | 0.                                  | 1.796742  | 3.230074  | -0.72729 |
| 26.                 | 6.   | 0.                                  | 0.385840  | 3.759763  | -0.86809 |
| 27.                 | 6.   | 0.                                  | 1.361655  | 4.468508  | 0.033784 |
| 28.                 | 6.   | 0.                                  | -1.531037 | 3.356952  | 0.765085 |
| 29.                 | 8.   | 0.                                  | -3.103181 | 0.394388  | -1.36911 |



|     |    |    |           |           |          |
|-----|----|----|-----------|-----------|----------|
| 30. | 6. | 0. | -2.656677 | 0.184914  | 2.809903 |
| 31. | 6. | 0. | -4.081391 | -0.350097 | 0.888915 |
| 32. | 8. | 0. | -4.596617 | -1.453398 | 0.316541 |
| 33. | 8. | 0. | -4.690641 | 0.693122  | 1.000493 |
| 34. | 6. | 0. | -5.875033 | -1.270216 | -0.31376 |
| 35. | 1. | 0. | -1.320525 | -1.498875 | -2.08119 |
| 36. | 6. | 0. | 4.285402  | -0.922221 | 0.853705 |
| 37. | 8. | 0. | 5.305333  | -0.110192 | 0.5176   |
| 38. | 8. | 0. | 4.433479  | -2.094494 | 1.131605 |
| 39. | 6. | 0. | 6.587842  | -0.751979 | 0.412484 |
| 40. | 1. | 0. | -0.340792 | 0.786300  | 2.096292 |
| 41. | 1. | 0. | 2.143845  | -2.136498 | 0.651955 |
| 42. | 1. | 0. | 0.378024  | -1.418448 | 1.844574 |
| 43. | 1. | 0. | -0.621522 | 1.581075  | -2.06199 |
| 44. | 1. | 0. | 3.628510  | 1.863627  | 0.872925 |
| 45. | 1. | 0. | 3.496180  | 1.091580  | -0.67185 |
| 46. | 1. | 0. | -1.755242 | -2.174539 | 2.614097 |
| 47. | 1. | 0. | -3.266351 | -2.665625 | 1.854361 |
| 48. | 1. | 0. | -1.893235 | -4.578248 | -0.05234 |
| 49. | 1. | 0. | 0.512858  | -3.770248 | -1.21117 |
| 50. | 1. | 0. | -0.838862 | -3.801440 | -2.33355 |
| 51. | 1. | 0. | 0.592537  | -0.081490 | -2.17229 |
| 52. | 1. | 0. | 1.817458  | 0.529832  | 2.731328 |
| 53. | 1. | 0. | 2.667181  | -1.012951 | 2.988866 |
| 54. | 1. | 0. | 3.566892  | 0.510113  | 2.940133 |
| 55. | 1. | 0. | 1.365205  | -2.745554 | -3.47677 |
| 56. | 1. | 0. | 1.970449  | -1.151076 | -3.91665 |
| 57. | 1. | 0. | 0.252912  | -1.543214 | -4.15526 |
| 58. | 1. | 0. | -3.020788 | 2.242017  | -2.23622 |
| 59. | 1. | 0. | 2.546774  | 3.327341  | -1.50808 |
| 60. | 1. | 0. | 0.052309  | 4.268942  | -1.76631 |
| 61. | 1. | 0. | 1.254656  | 4.389310  | 1.111945 |
| 62. | 1. | 0. | 1.736864  | 5.427665  | -0.31183 |
| 63. | 1. | 0. | -0.992878 | 3.800063  | 1.606957 |
| 64. | 1. | 0. | -2.108346 | 4.139982  | 0.268368 |
| 65. | 1. | 0. | -2.250829 | 2.634009  | 1.159971 |
| 66. | 1. | 0. | -3.449587 | -0.218622 | 3.447805 |
| 67. | 1. | 0. | -1.713239 | 0.043733  | 3.342073 |
| 68. | 1. | 0. | -2.849604 | 1.251216  | 2.691252 |
| 69. | 1. | 0. | -6.148615 | -2.247175 | -0.71185 |
| 70. | 1. | 0. | -5.788158 | -0.536040 | -1.11734 |
| 71. | 1. | 0. | -6.617222 | -0.926298 | 0.410285 |
| 72. | 1. | 0. | 7.290445  | 0.038005  | 0.148067 |

|     |    |    |          |           |          |
|-----|----|----|----------|-----------|----------|
| 73. | 1. | 0. | 6.561519 | -1.519746 | -0.36393 |
| 74. | 1. | 0. | 6.866407 | -1.215203 | 1.361832 |

**Figure S6.**  $^1\text{H}$  NMR spectrum of chlorahupetone A (**1**) in  $\text{CDCl}_3$

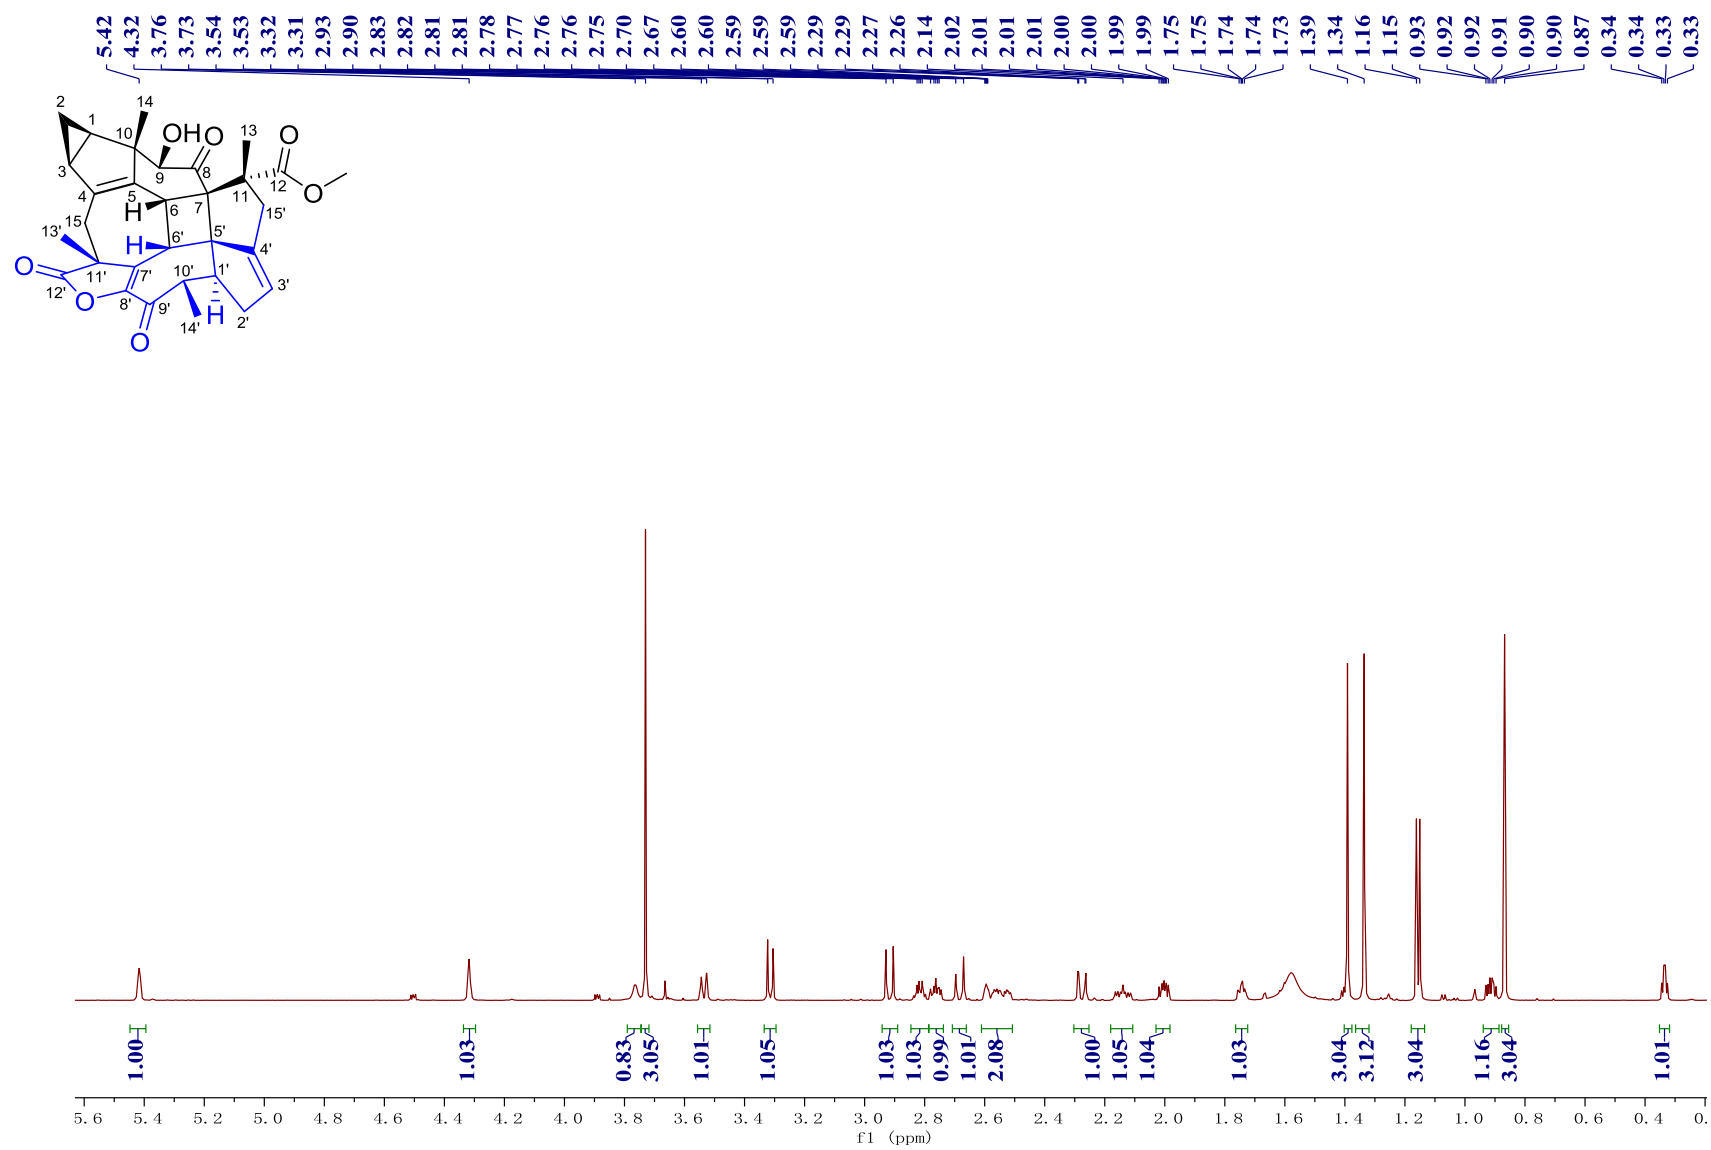

Figure S7.  $^{13}\text{C}$  NMR and DEPT spectrum of chlorahupetone A (**1**) in  $\text{CDCl}_3$

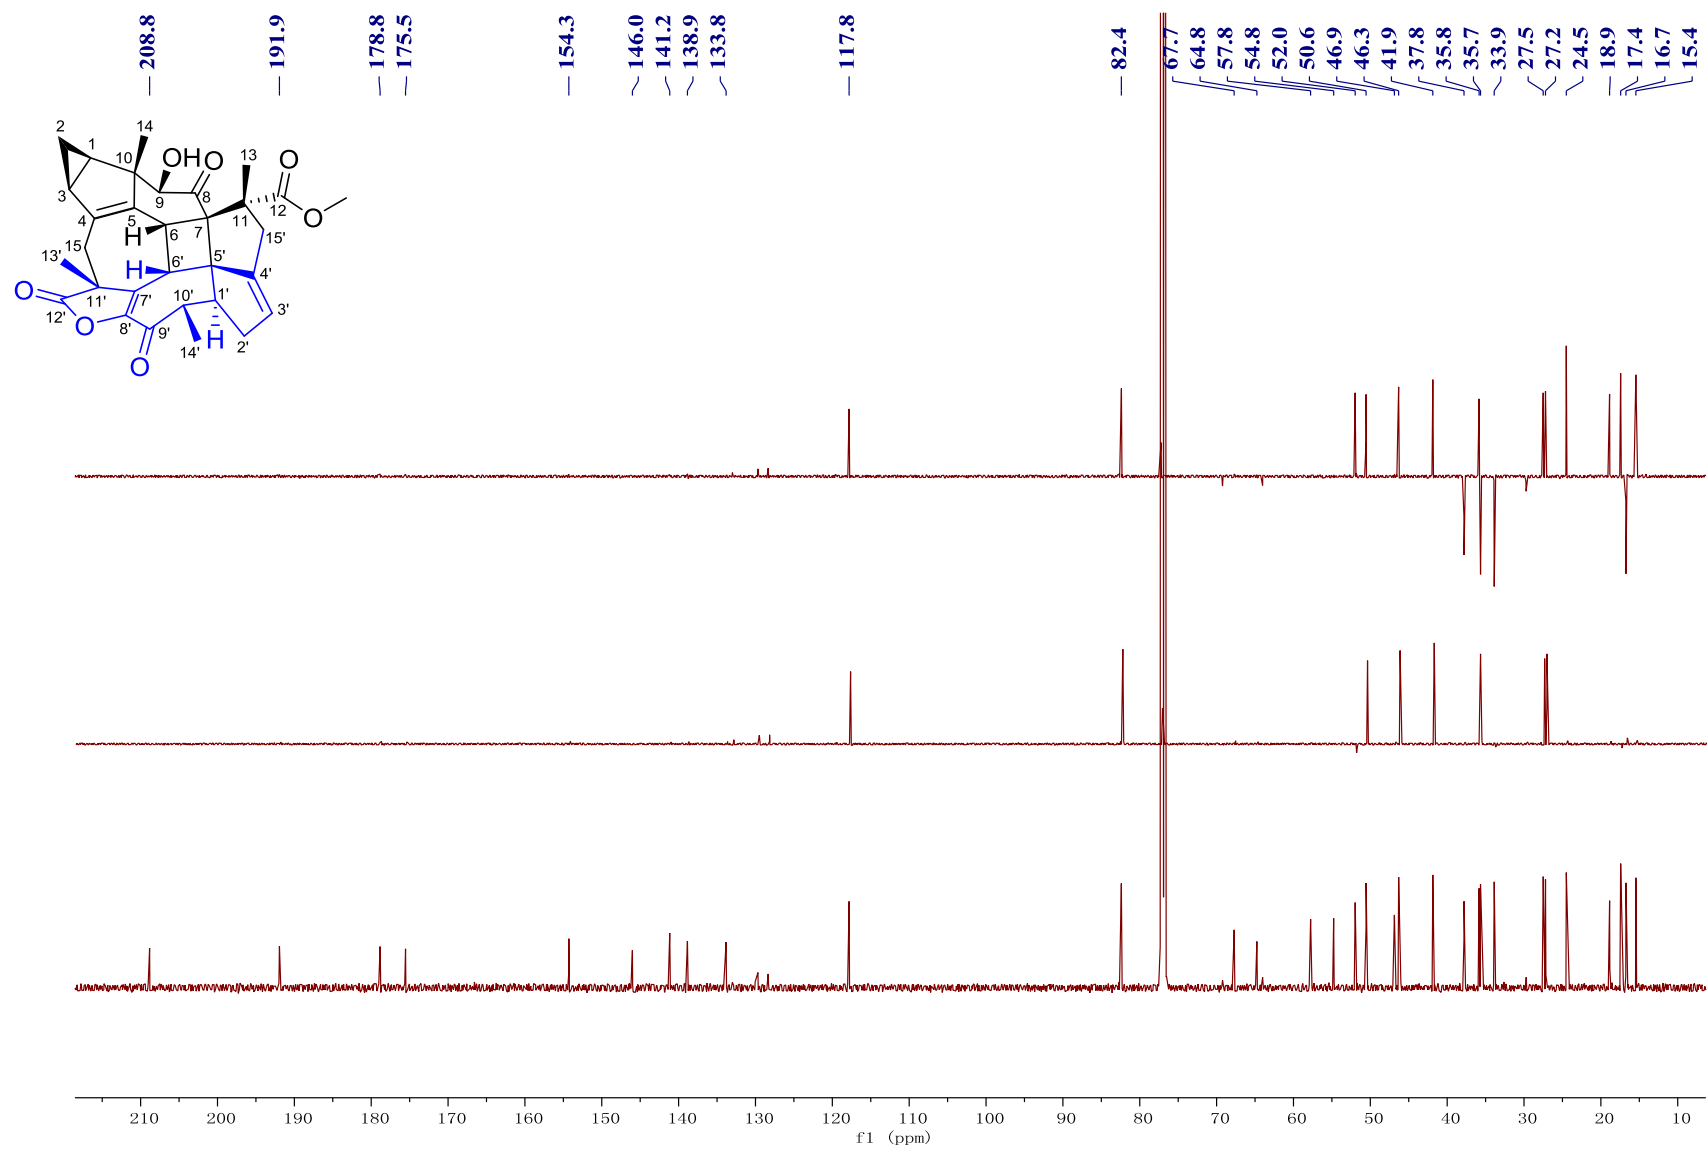

**Figure S8.** HSQC spectrum of chlorahupetone A (**1**) in CDCl<sub>3</sub>

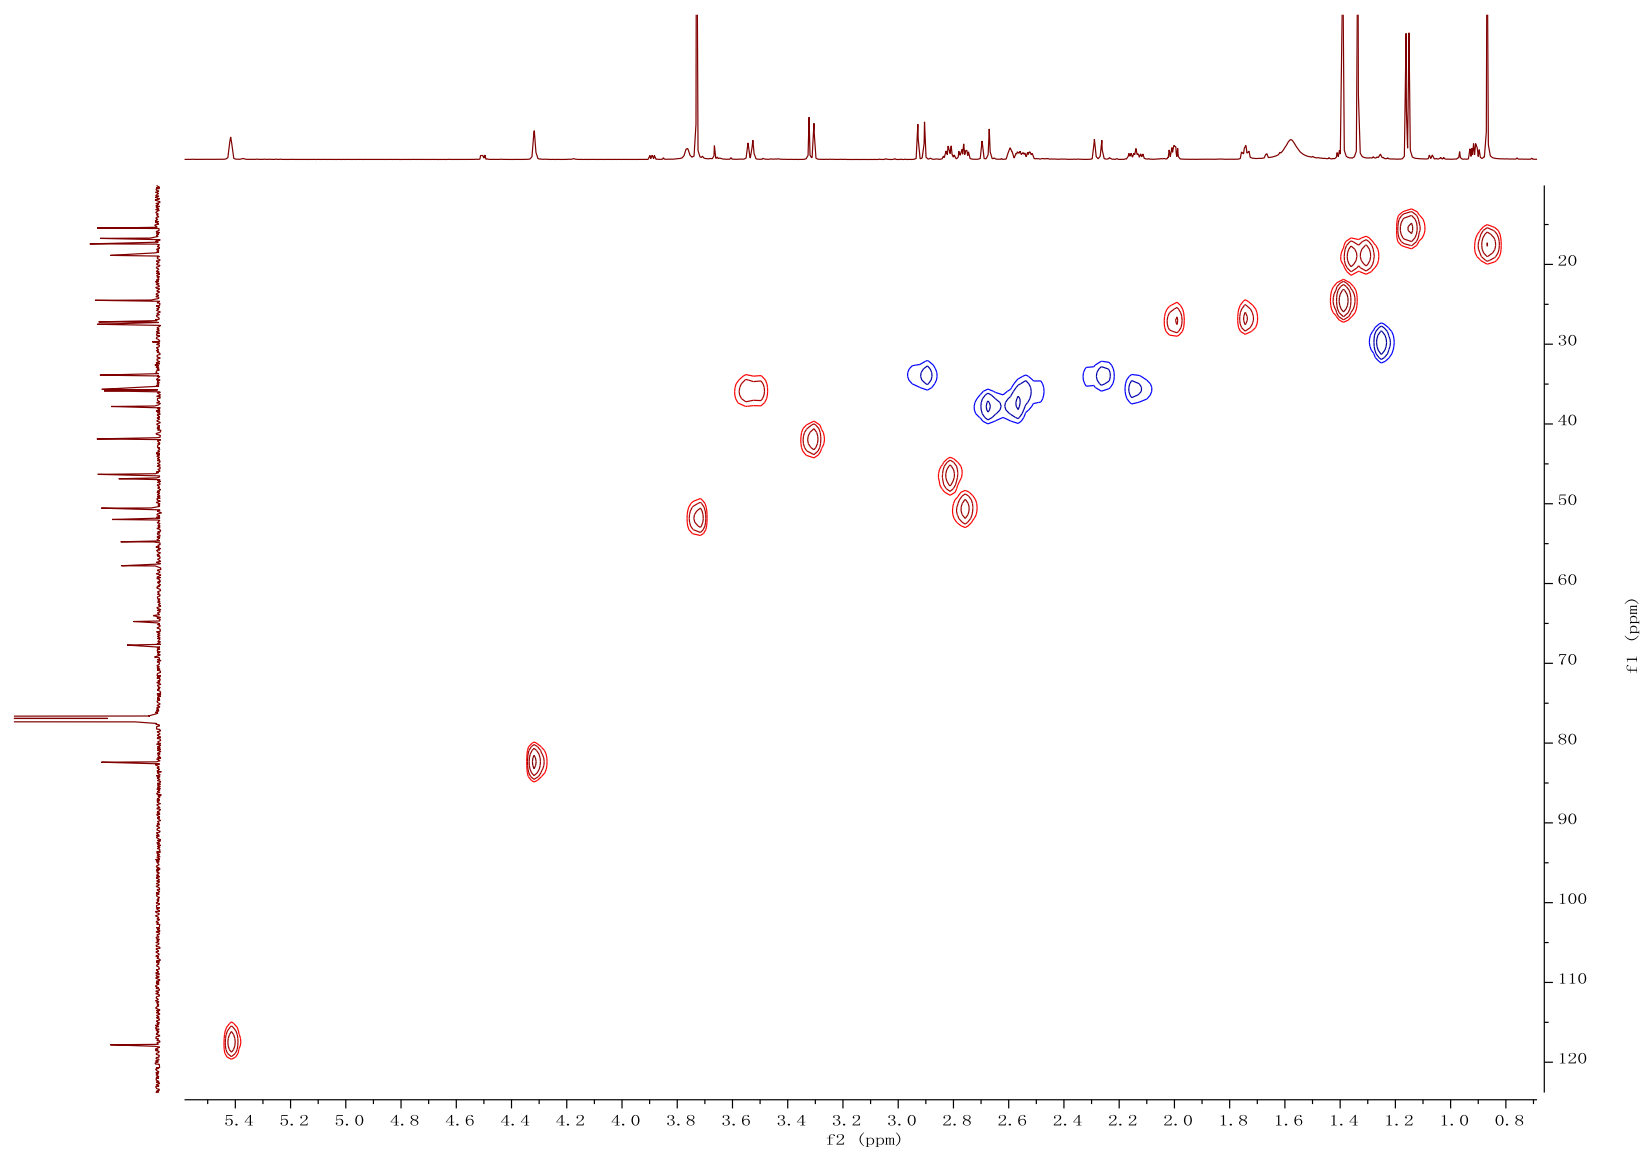

**Figure S9.** HMBC spectrum of chlorahupetone A (**1**) in CDCl<sub>3</sub>

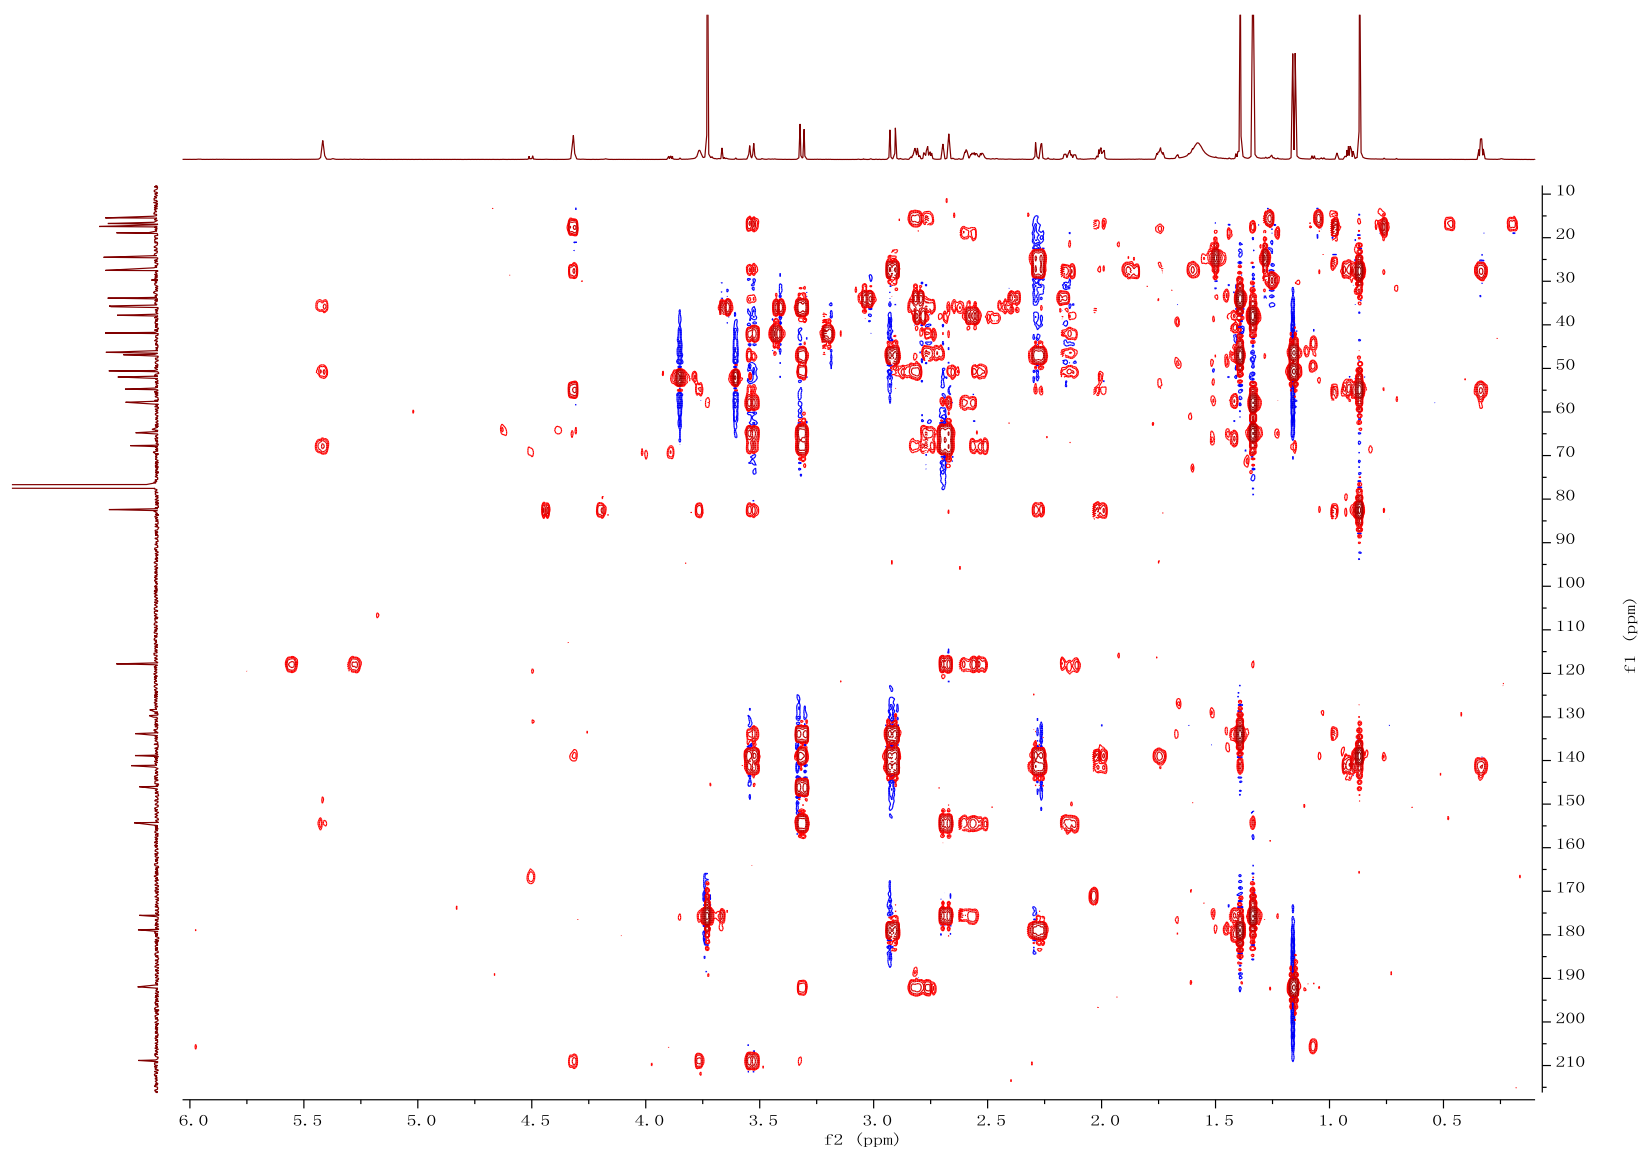

**Figure S10.**  $^1\text{H}$ - $^1\text{H}$  COSY spectrum of chlorahupetone A (**1**) in  $\text{CDCl}_3$

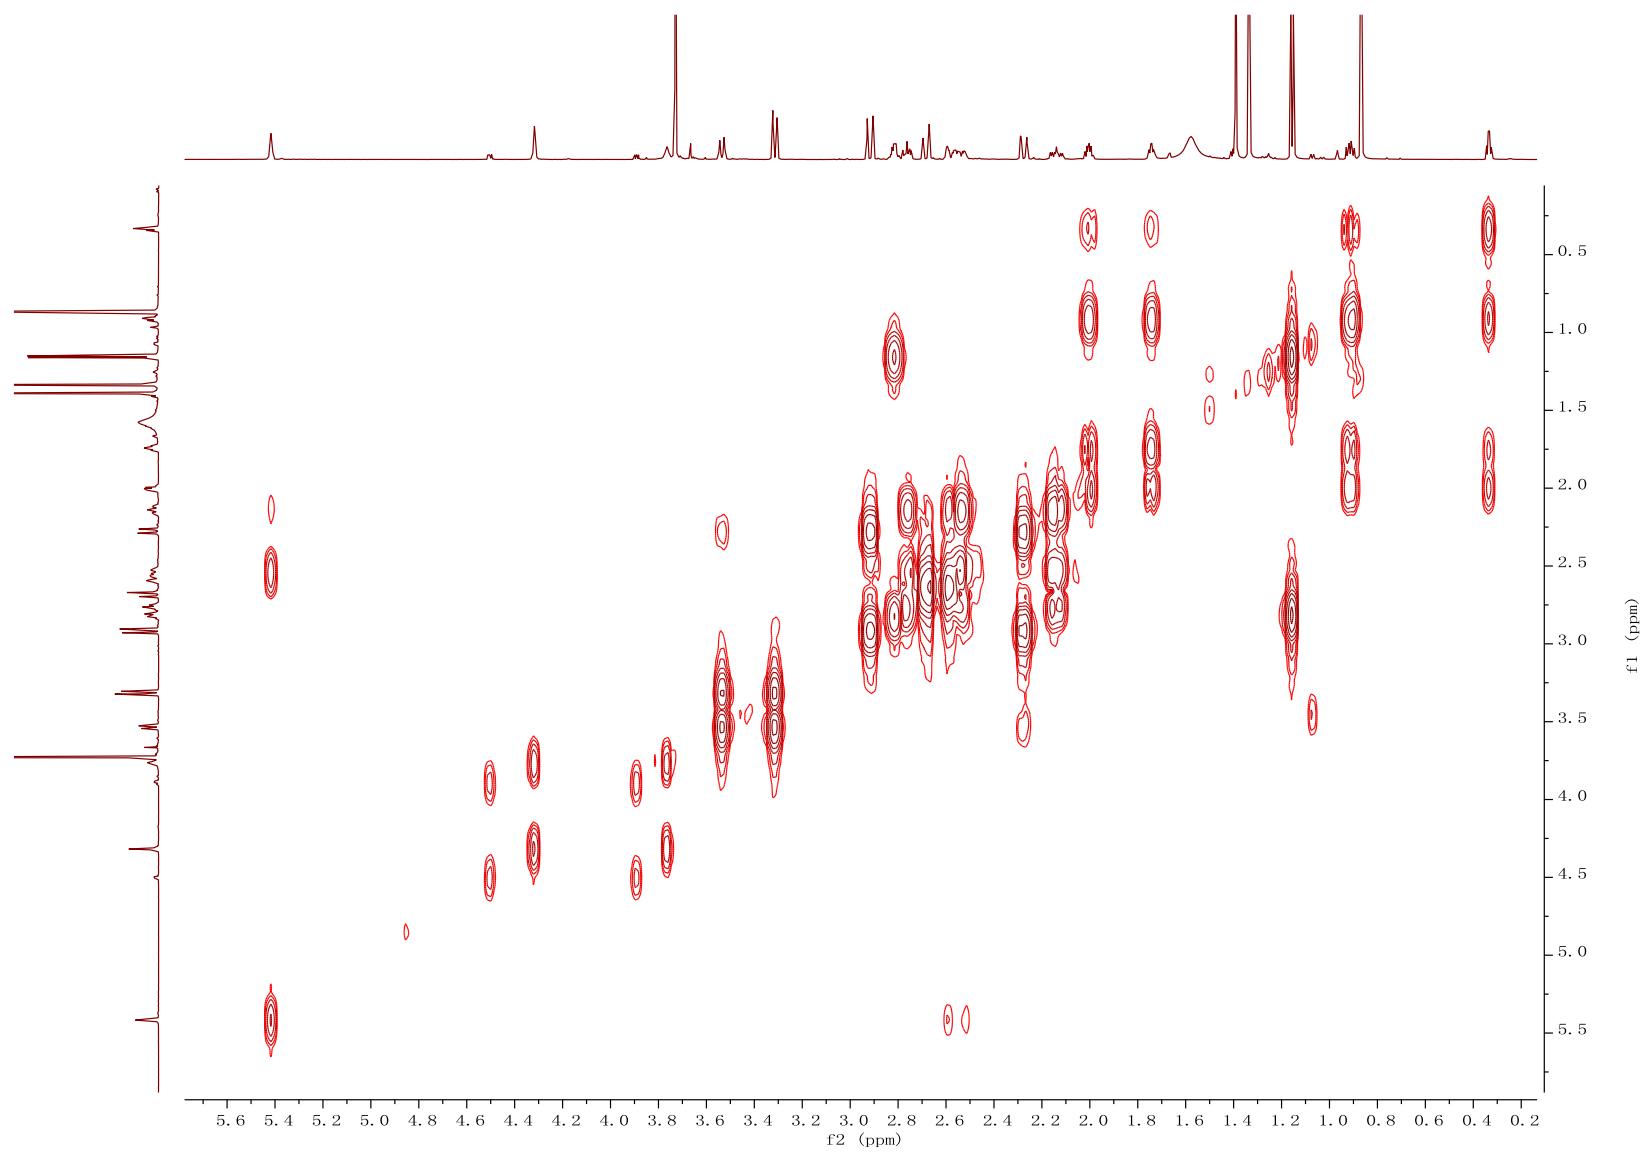

**Figure S11.** NOESY spectrum of chlorahupetone A (**1**) in  $\text{CDCl}_3$

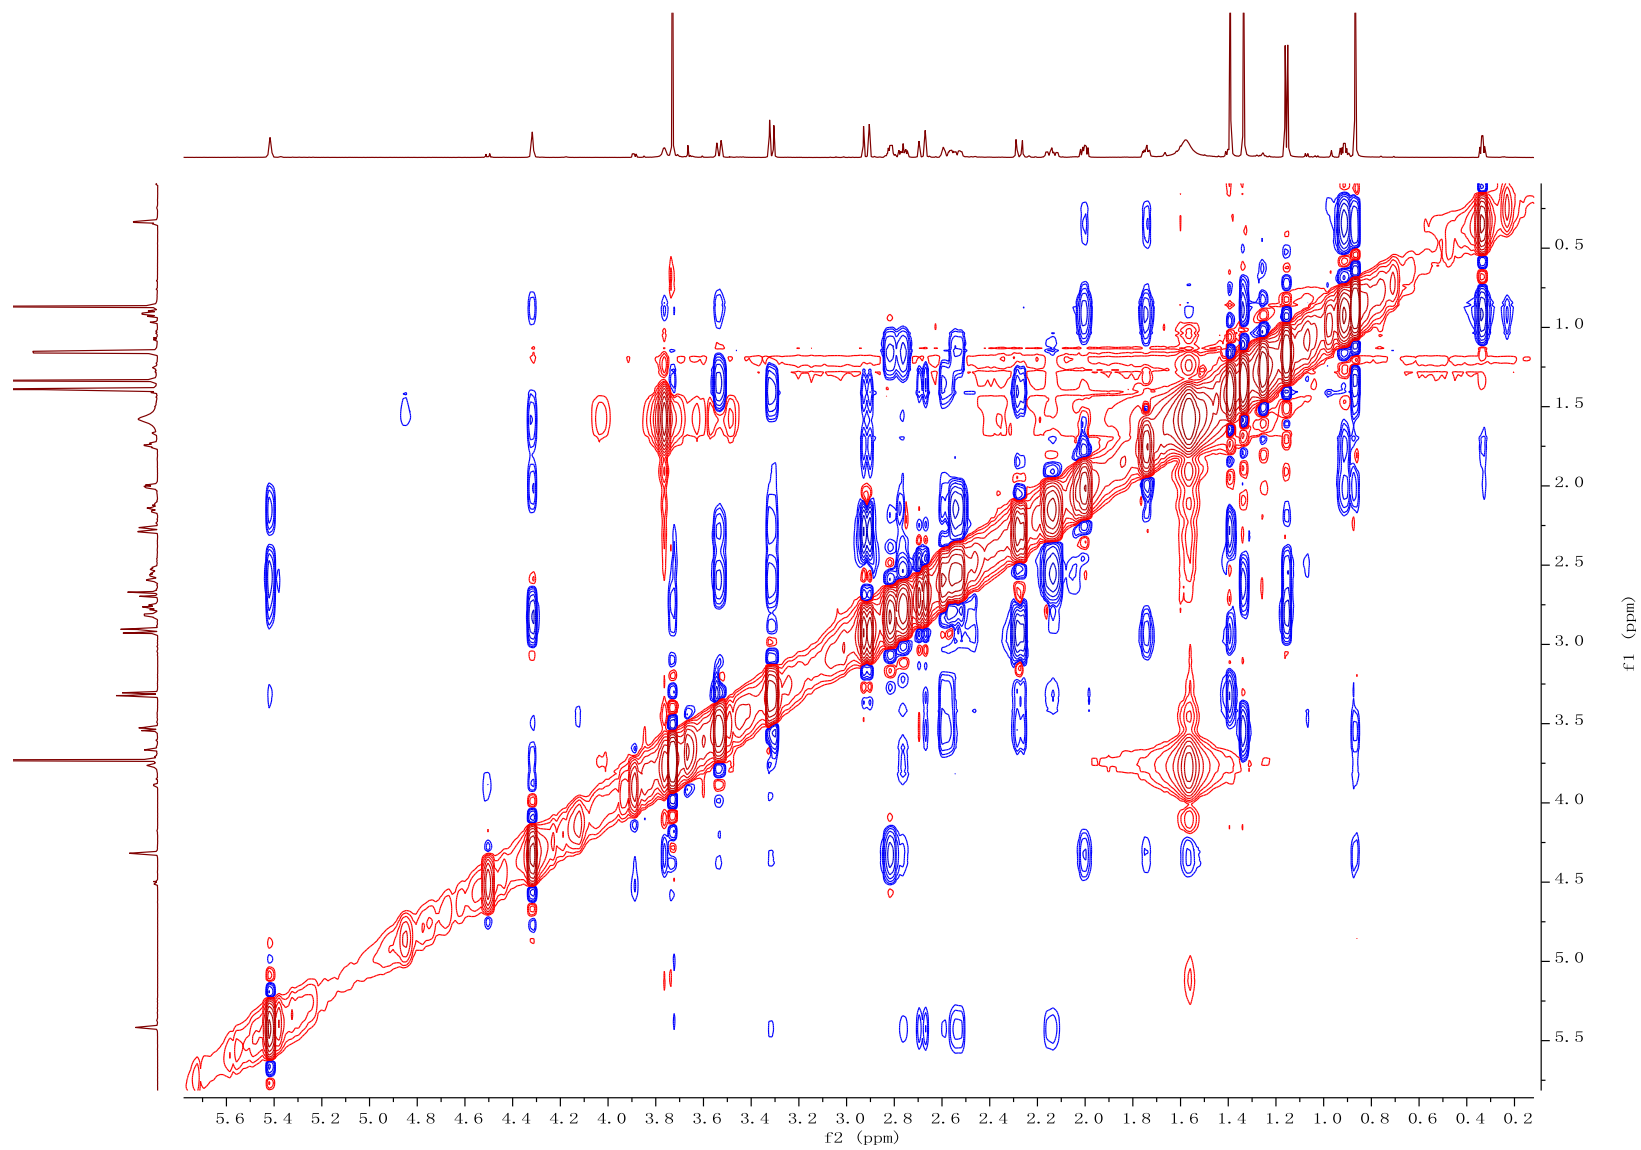



Figure S12. (-)-HRESIMS spectrum of chlorahupetone A (1)

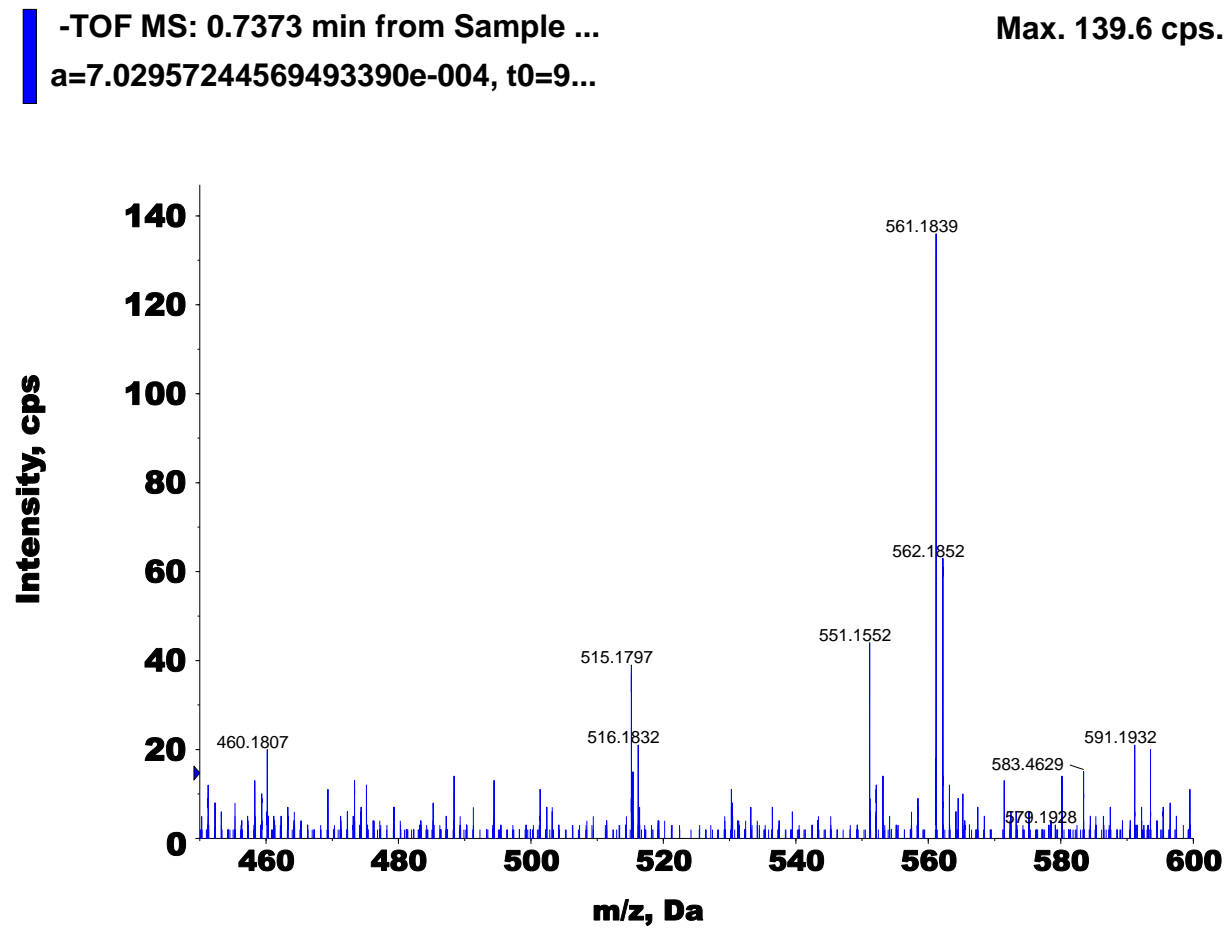

Figure S13. IR spectrum of chlorahupetone A (1)

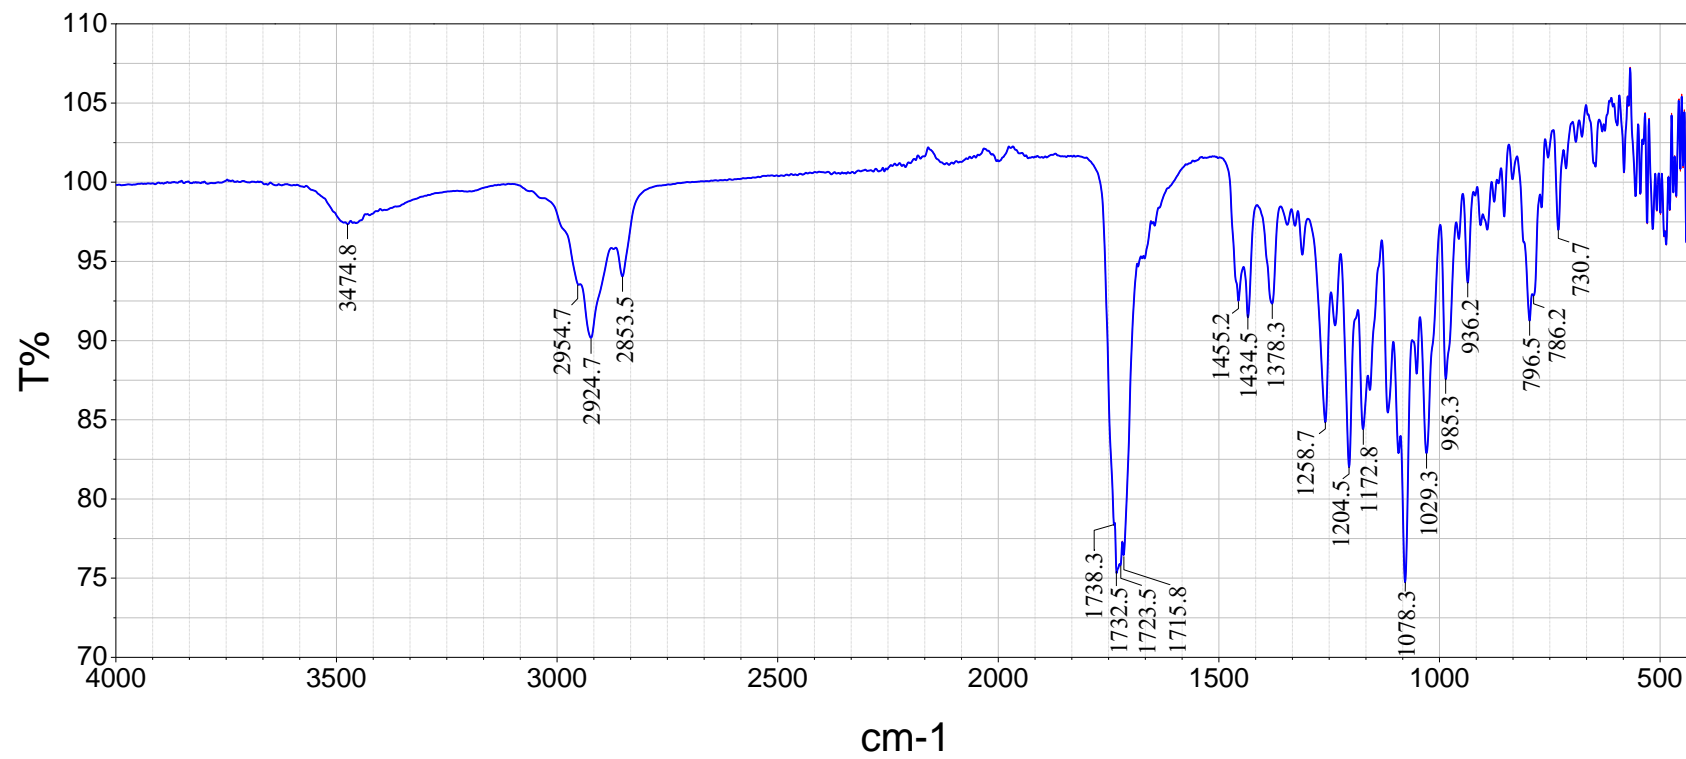

**Figure S14.**  $^1\text{H}$  NMR spectrum of chlorahupetone B (**2**) in pyridine- $d_5$

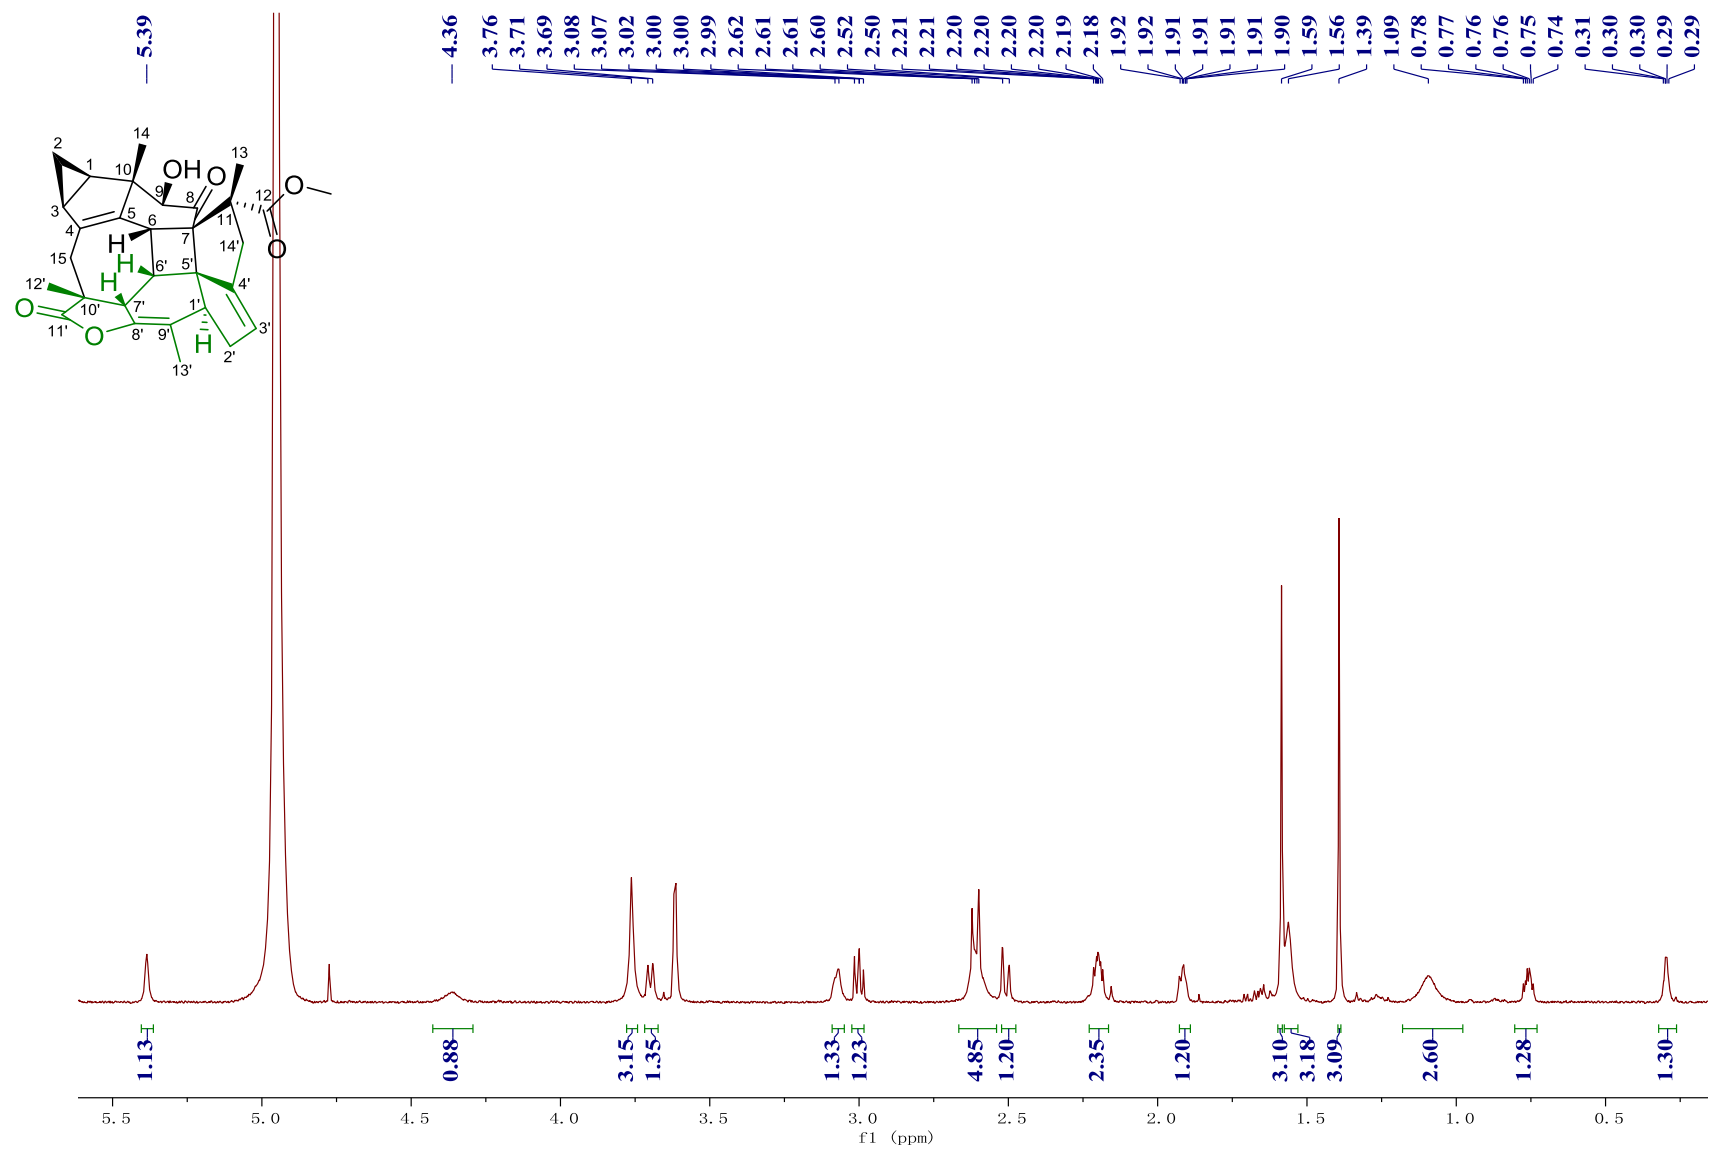

Figure S15.  $^{13}\text{C}$  NMR spectrum of chlorahupetone B (2) in pyridine- $d_5$

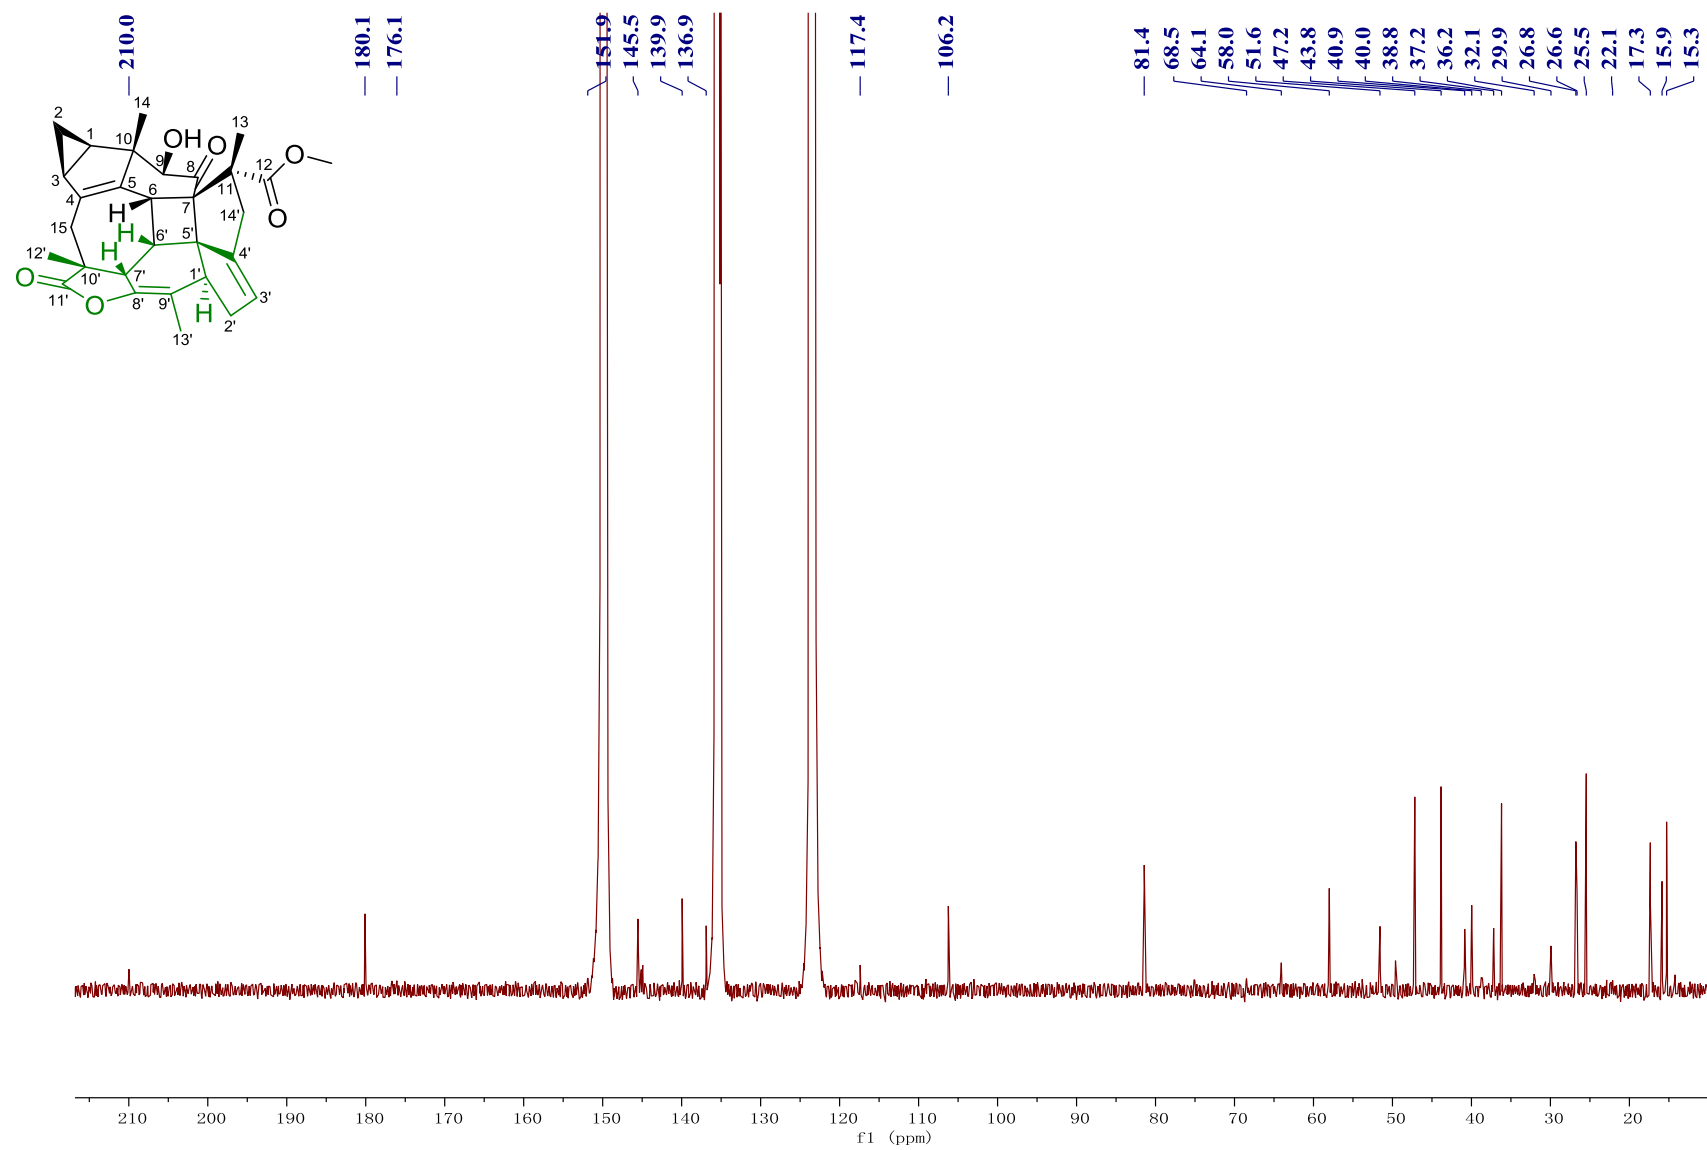

**Figure S16.** HSQC spectrum of chlorahupetone B (**2**) in pyridine-*d*<sub>5</sub>

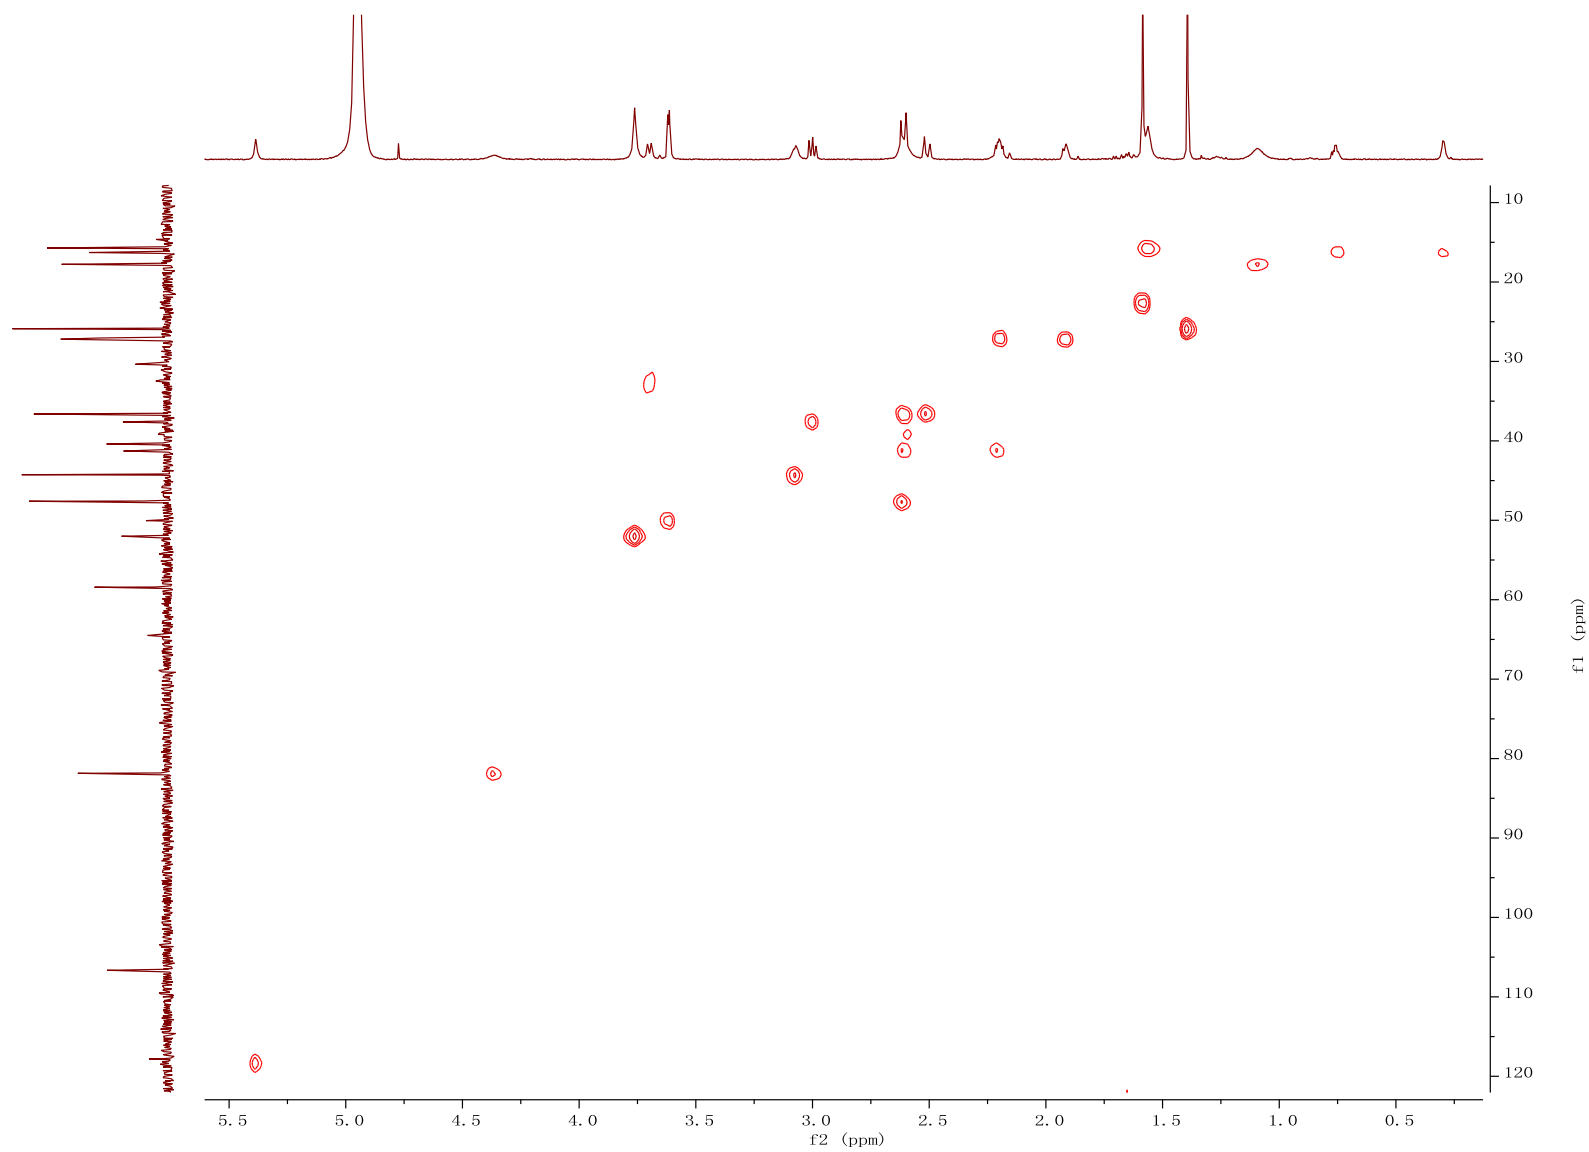

Figure S17. HMBC spectrum of chlorahupetone B (2) in pyridine-*d*<sub>5</sub>

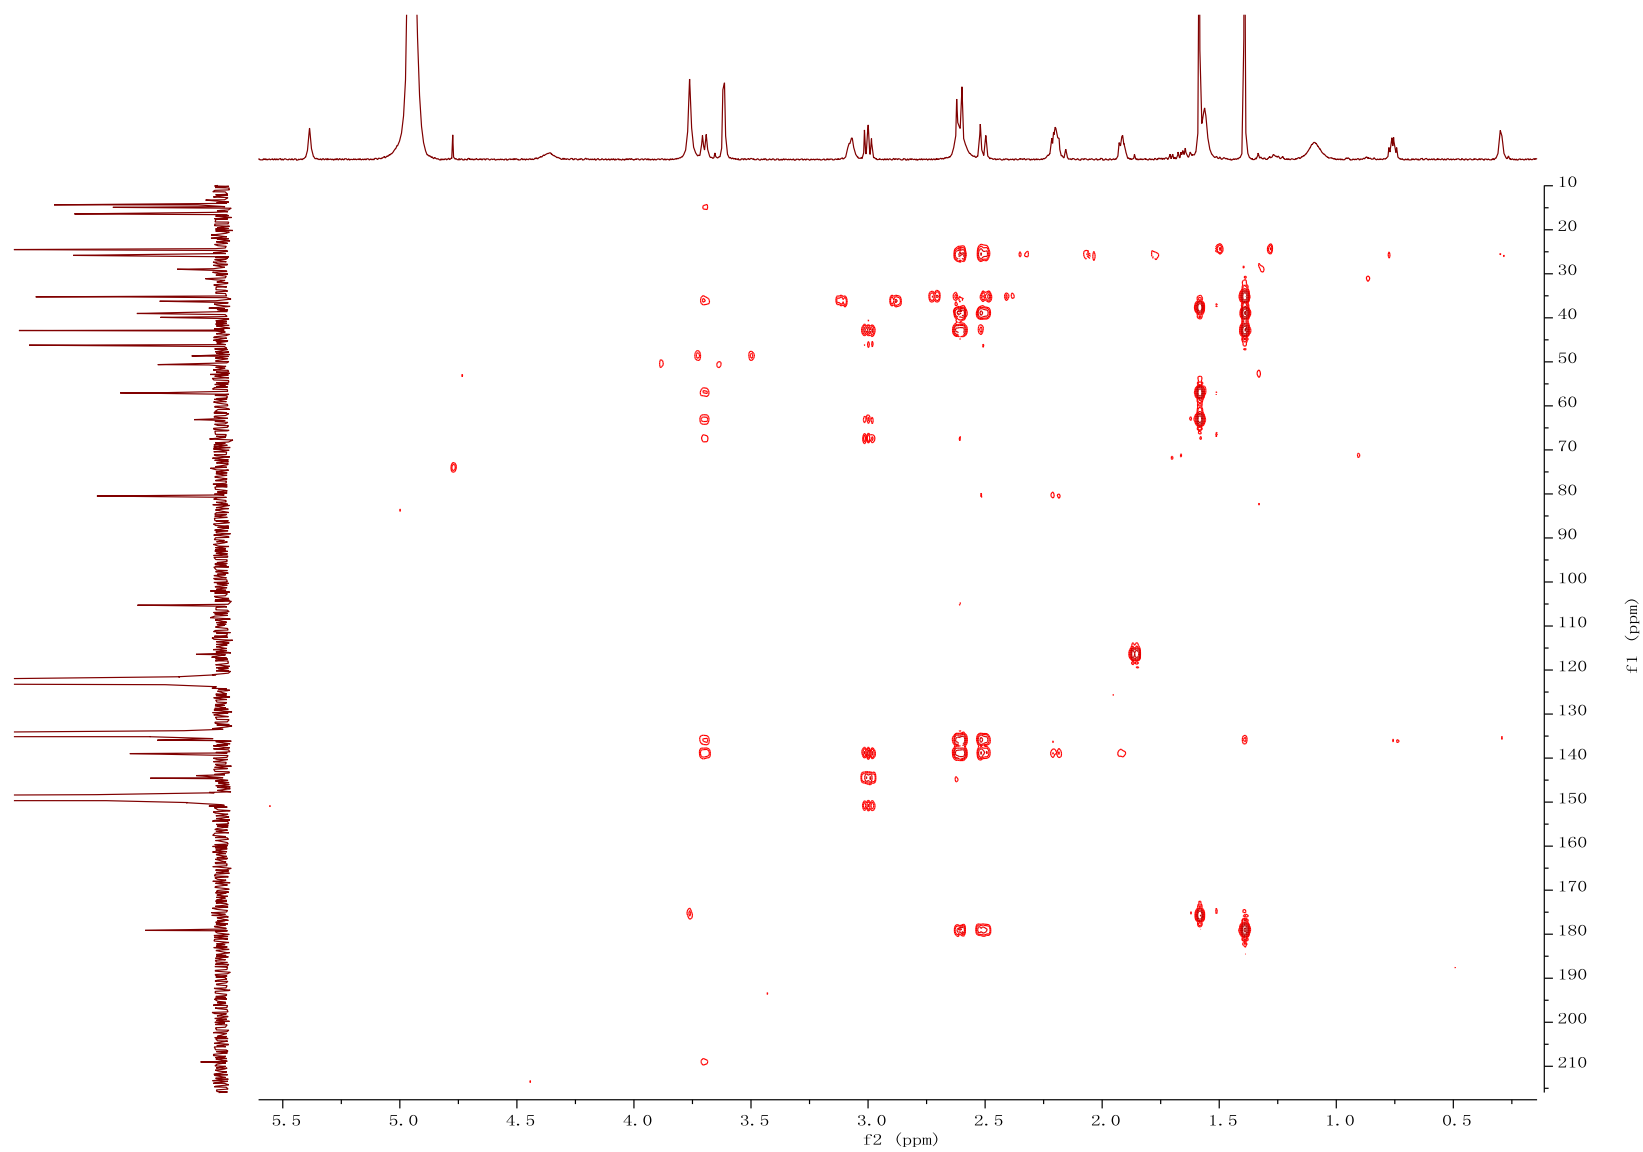

**Figure S18.**  $^1\text{H}$ - $^1\text{H}$  COSY spectrum of chlorahupetone B (**2**) in pyridine- $d_5$

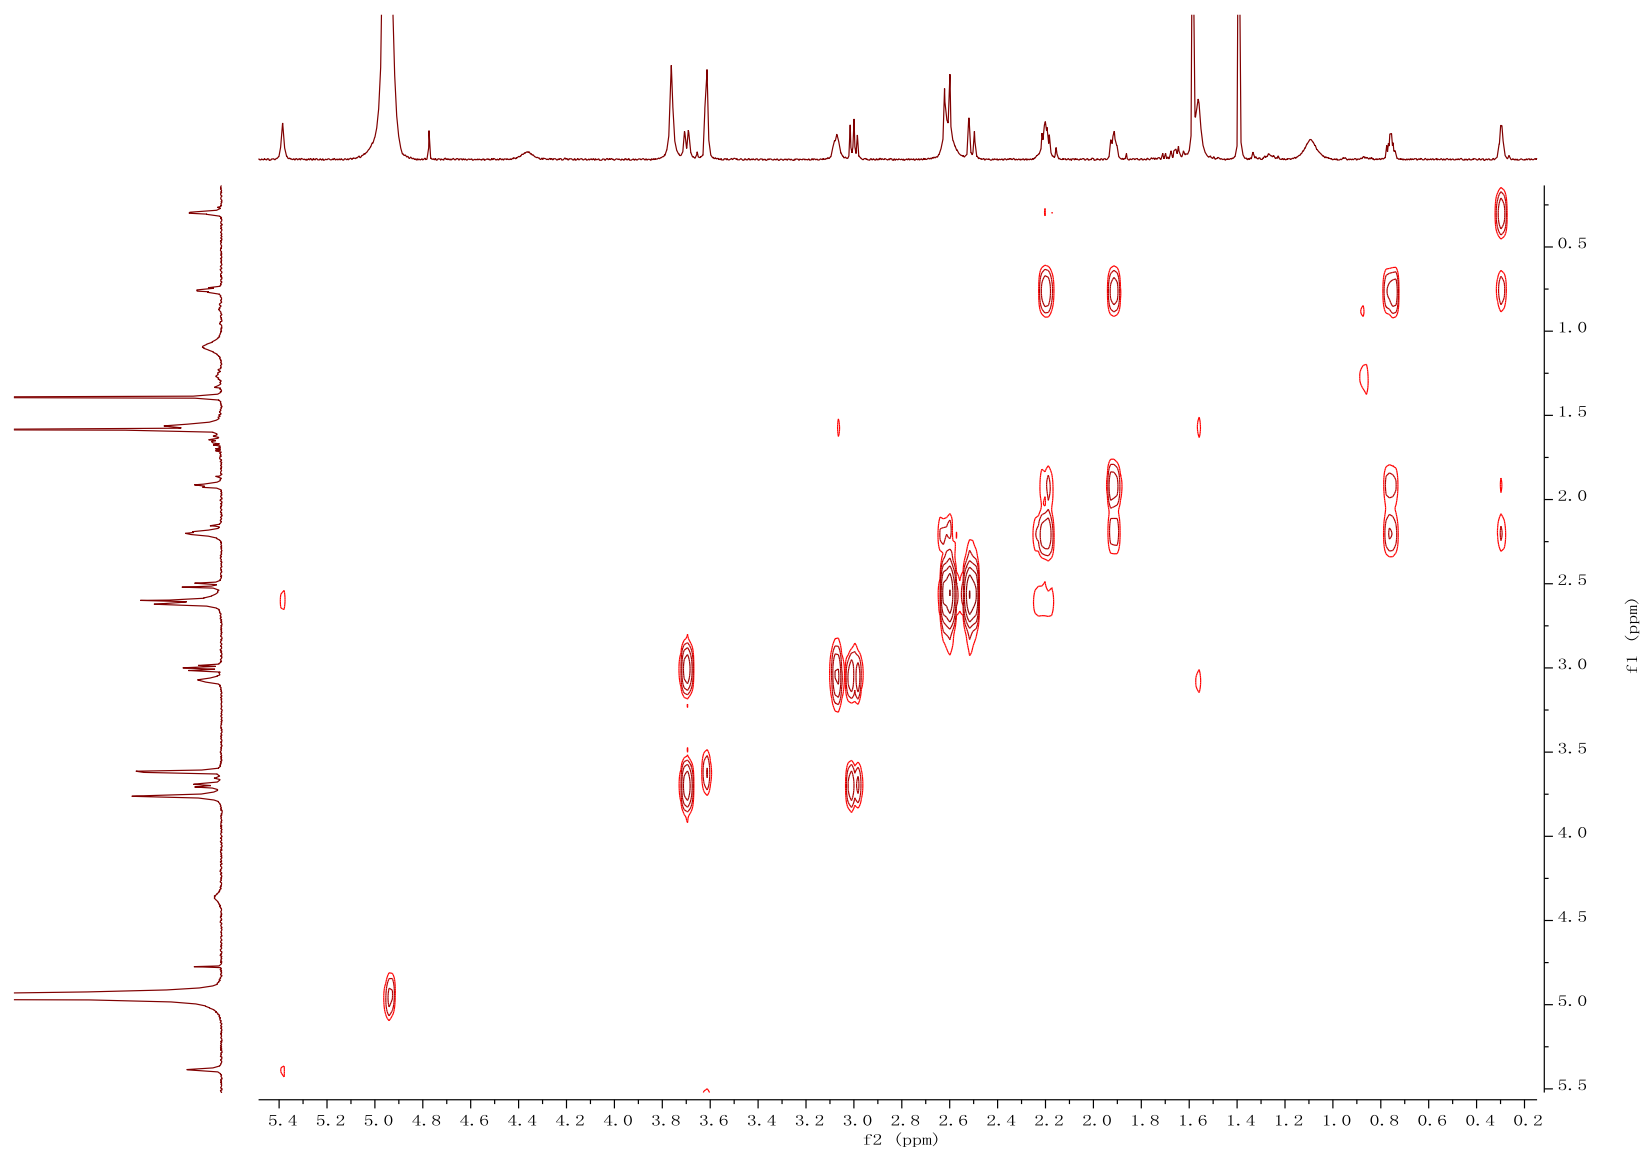

**Figure S19.** NOESY spectrum of chlorahupetone B (**2**) in pyridine-*d*<sub>5</sub>

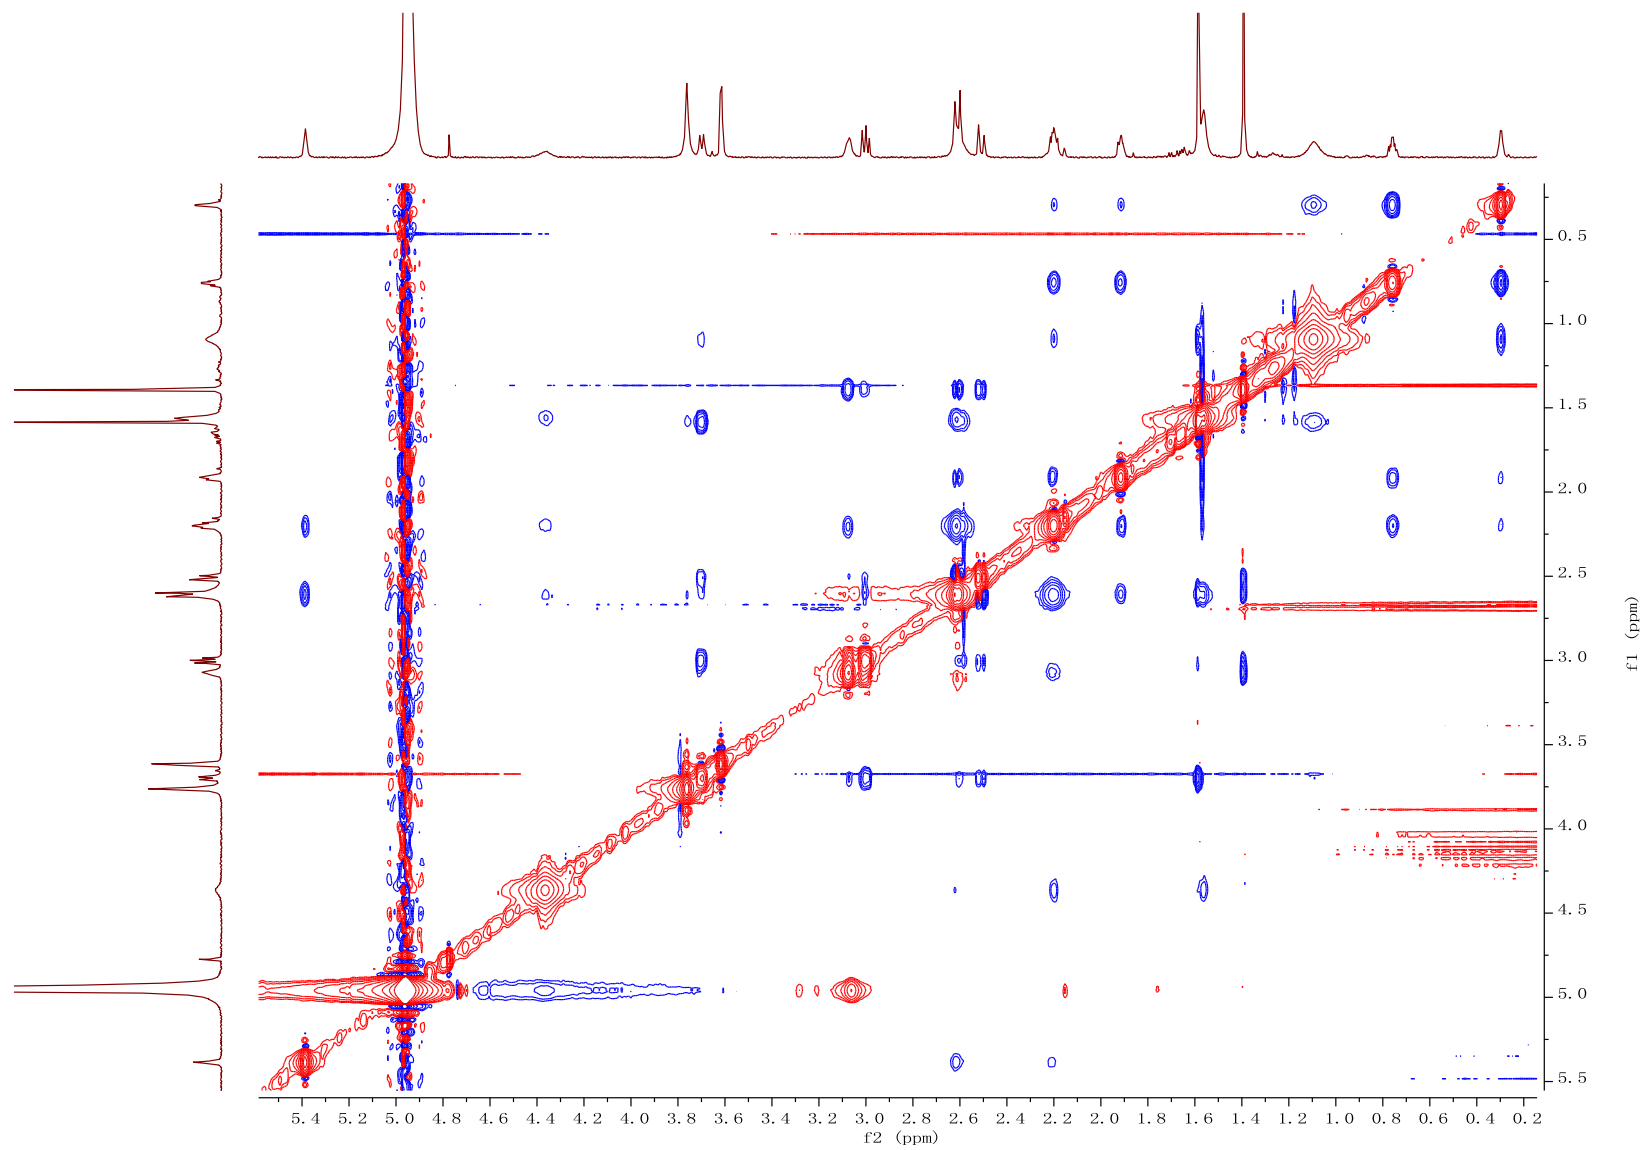



Figure S20. (+)-HRESIMS spectrum of chlorahupetone B (2)

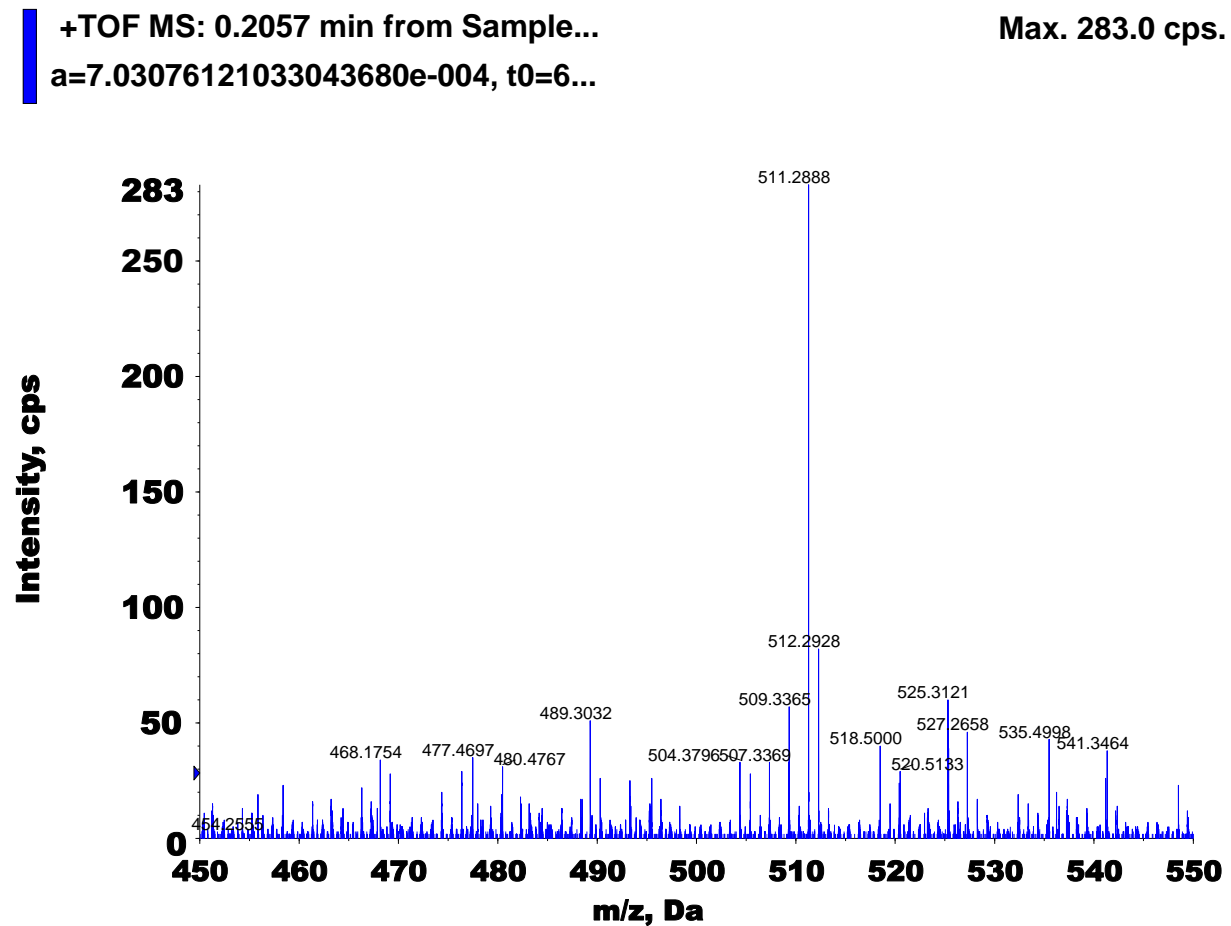

Figure S21. IR spectrum of chlorahupetone B (2)

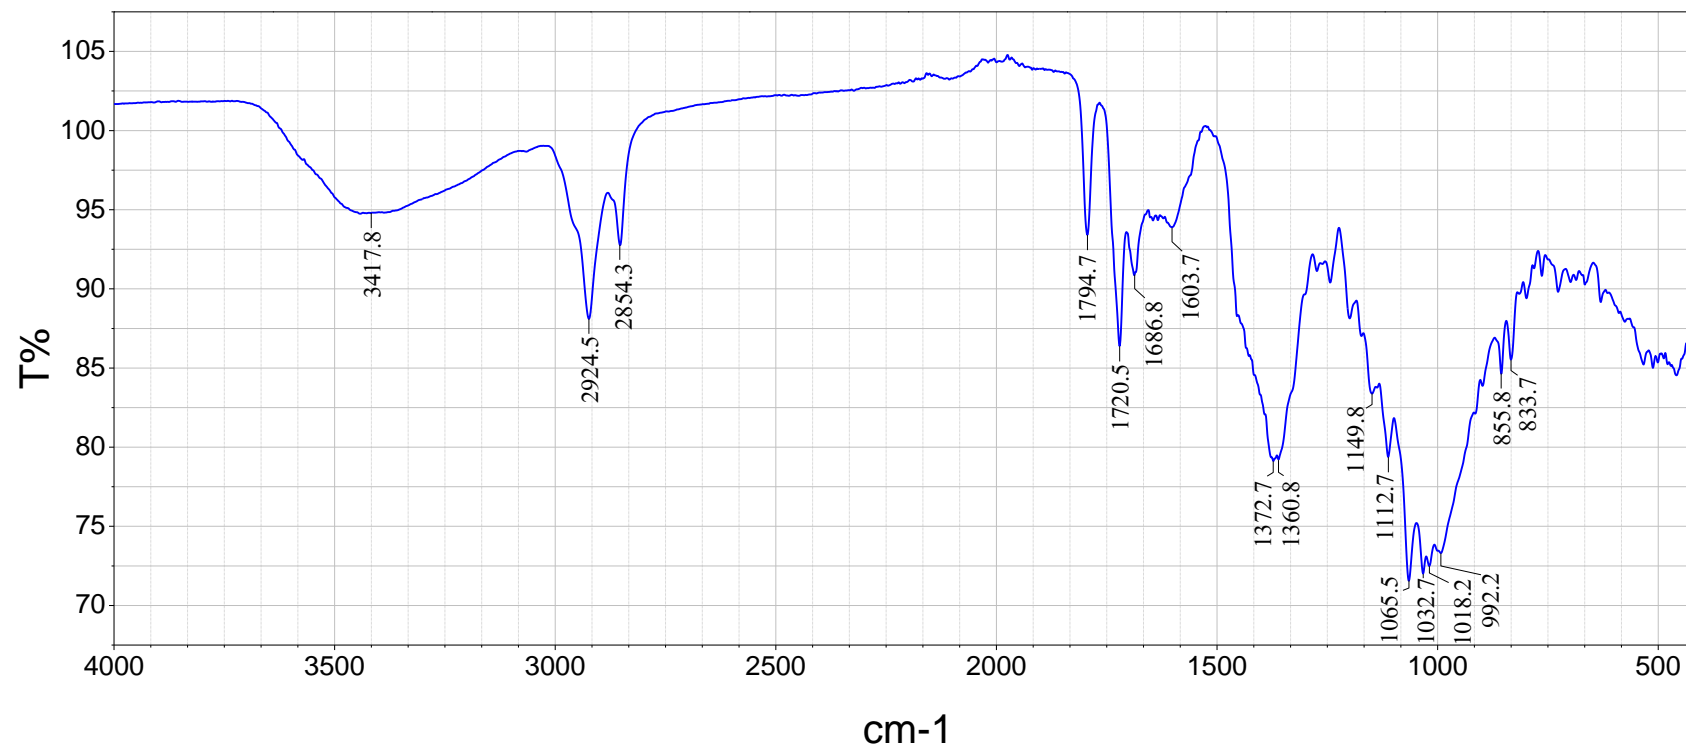

**Figure S22.**  $^1\text{H}$  NMR spectrum of chlorahupetone C (**3**) in  $\text{CDCl}_3$

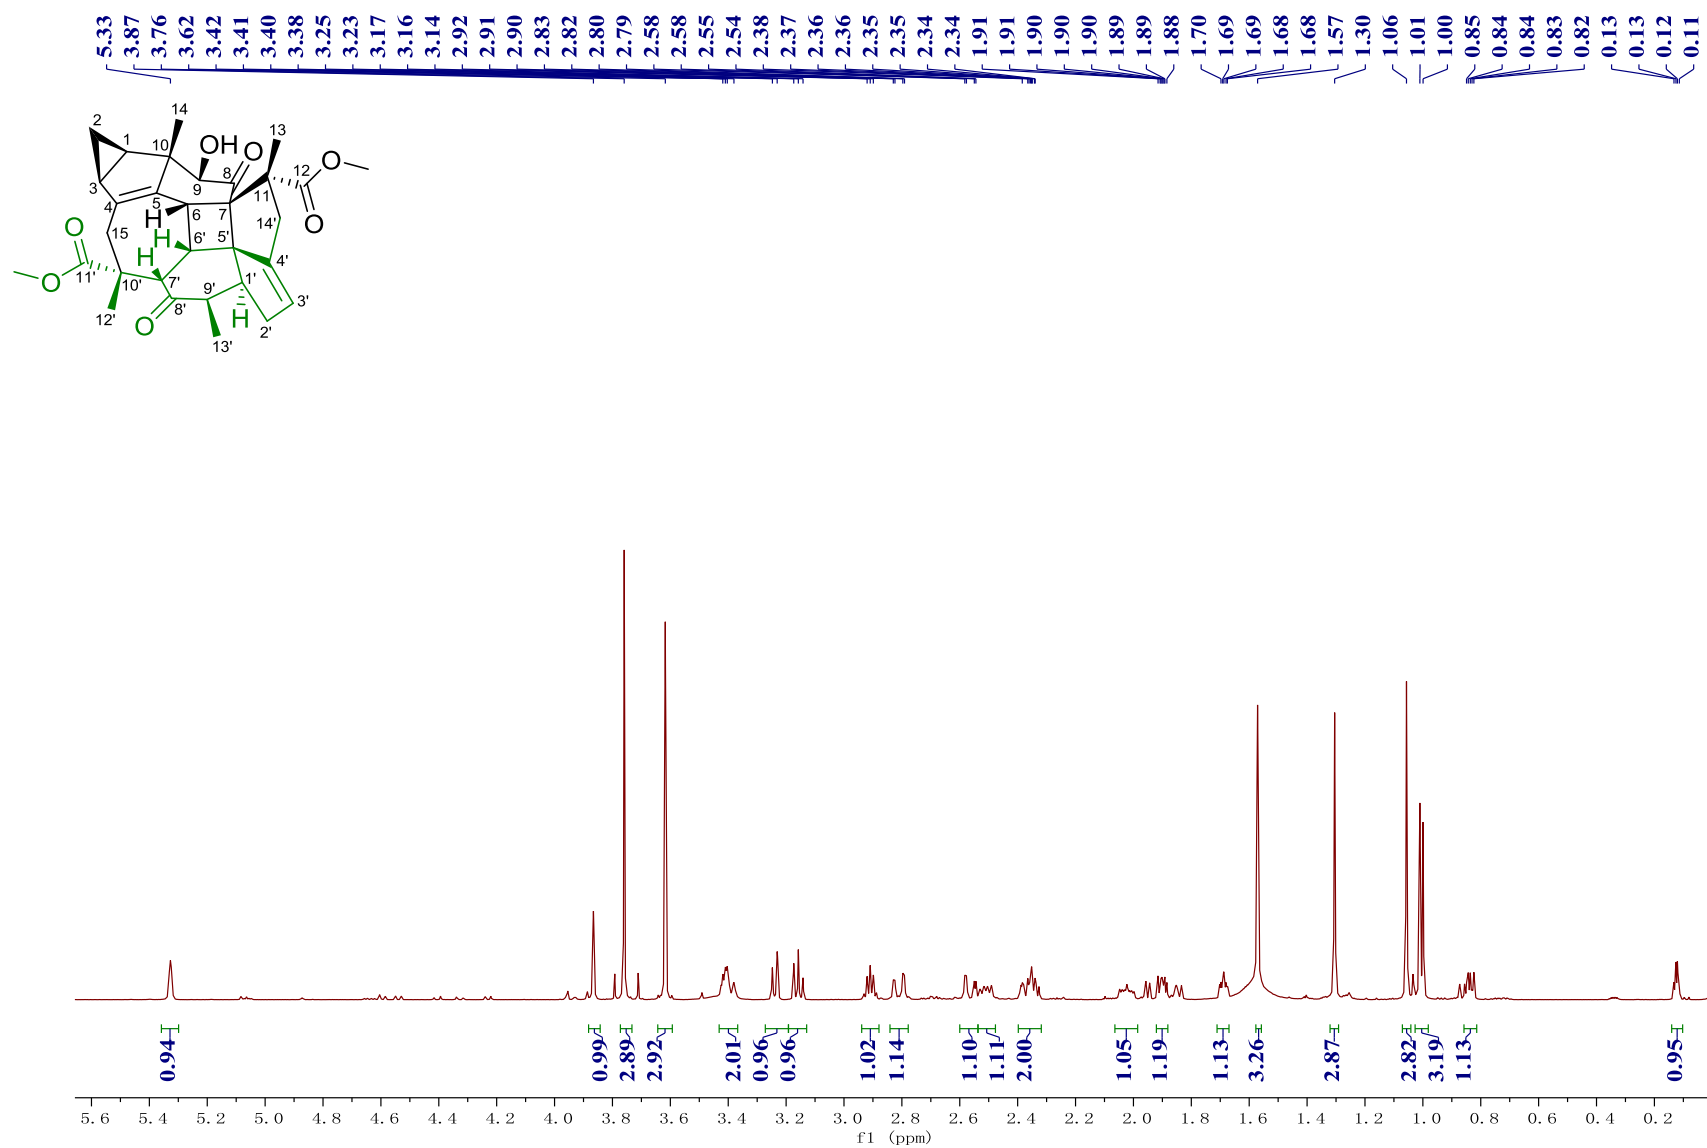

**Figure S23.**  $^{13}\text{C}$  NMR and DEPT spectrum of chlorahupetone C (**3**) in  $\text{CDCl}_3$

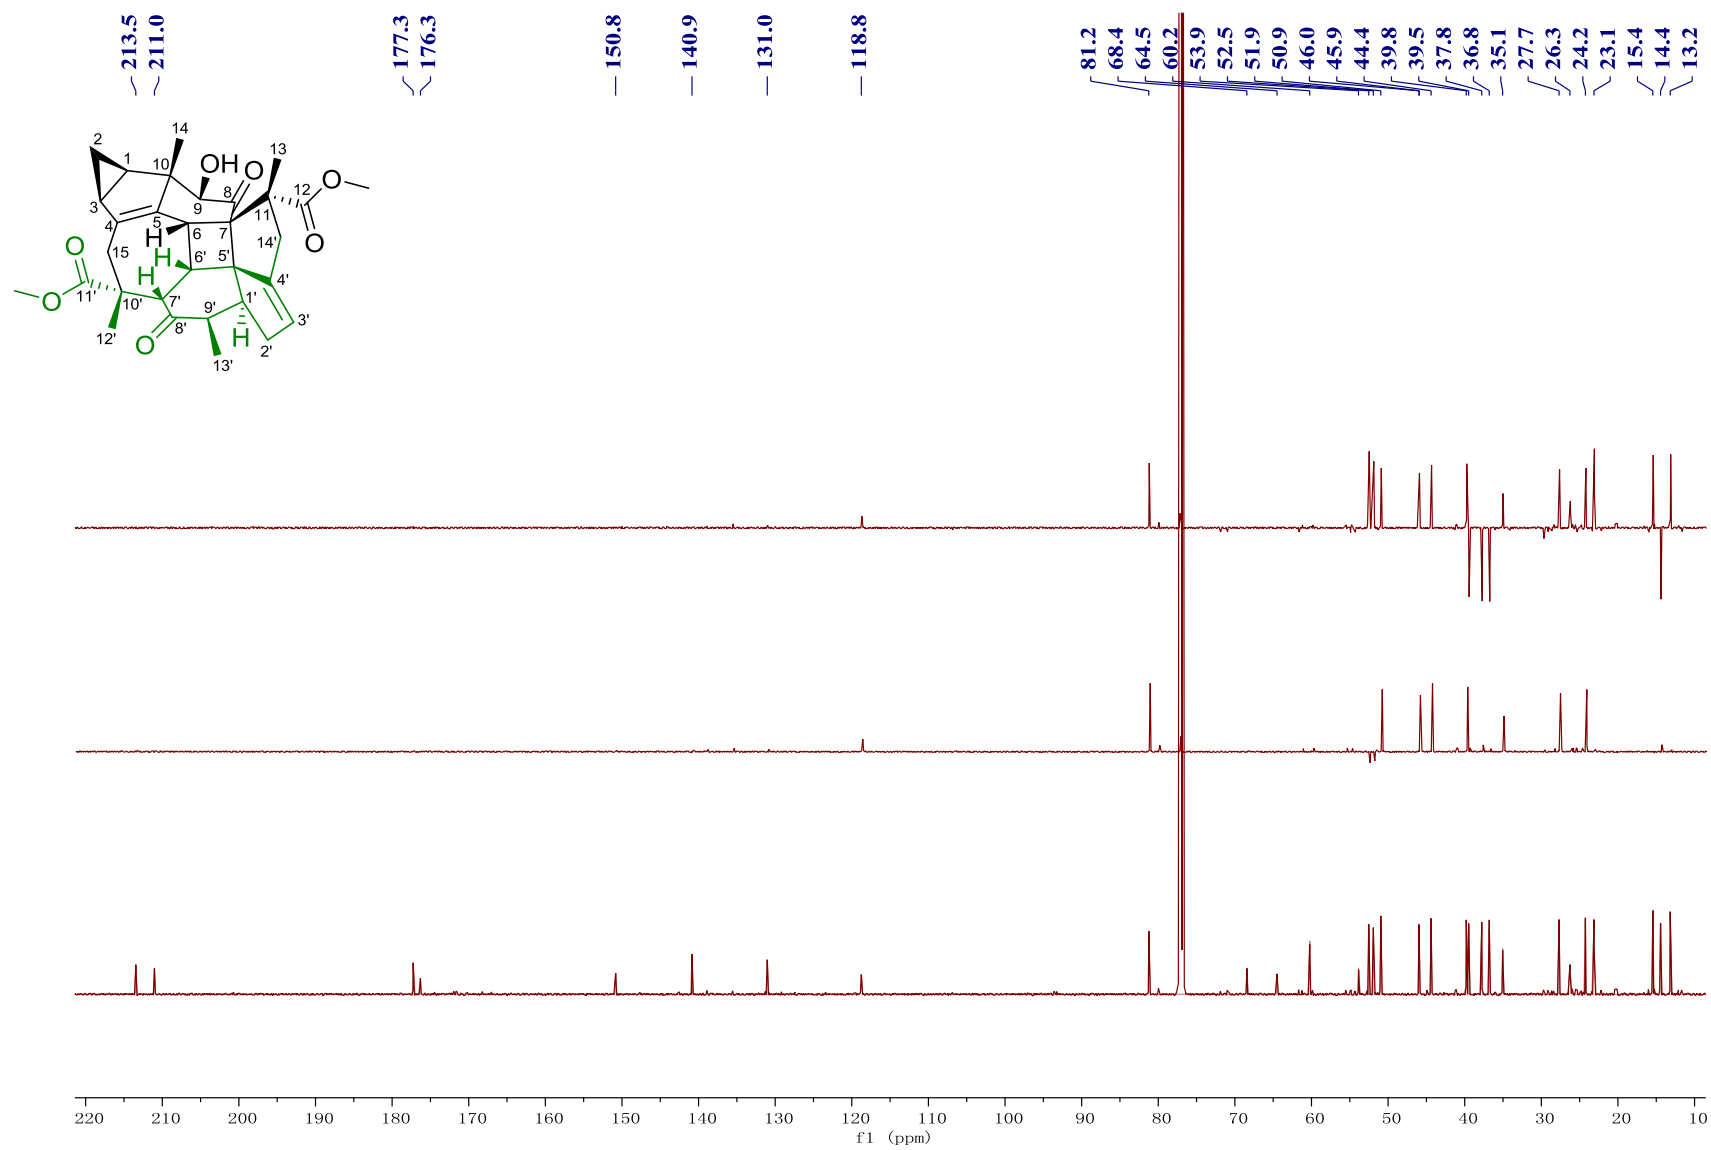

**Figure S24.** HSQC spectrum of chlorahupetone C (**3**) in CDCl<sub>3</sub>

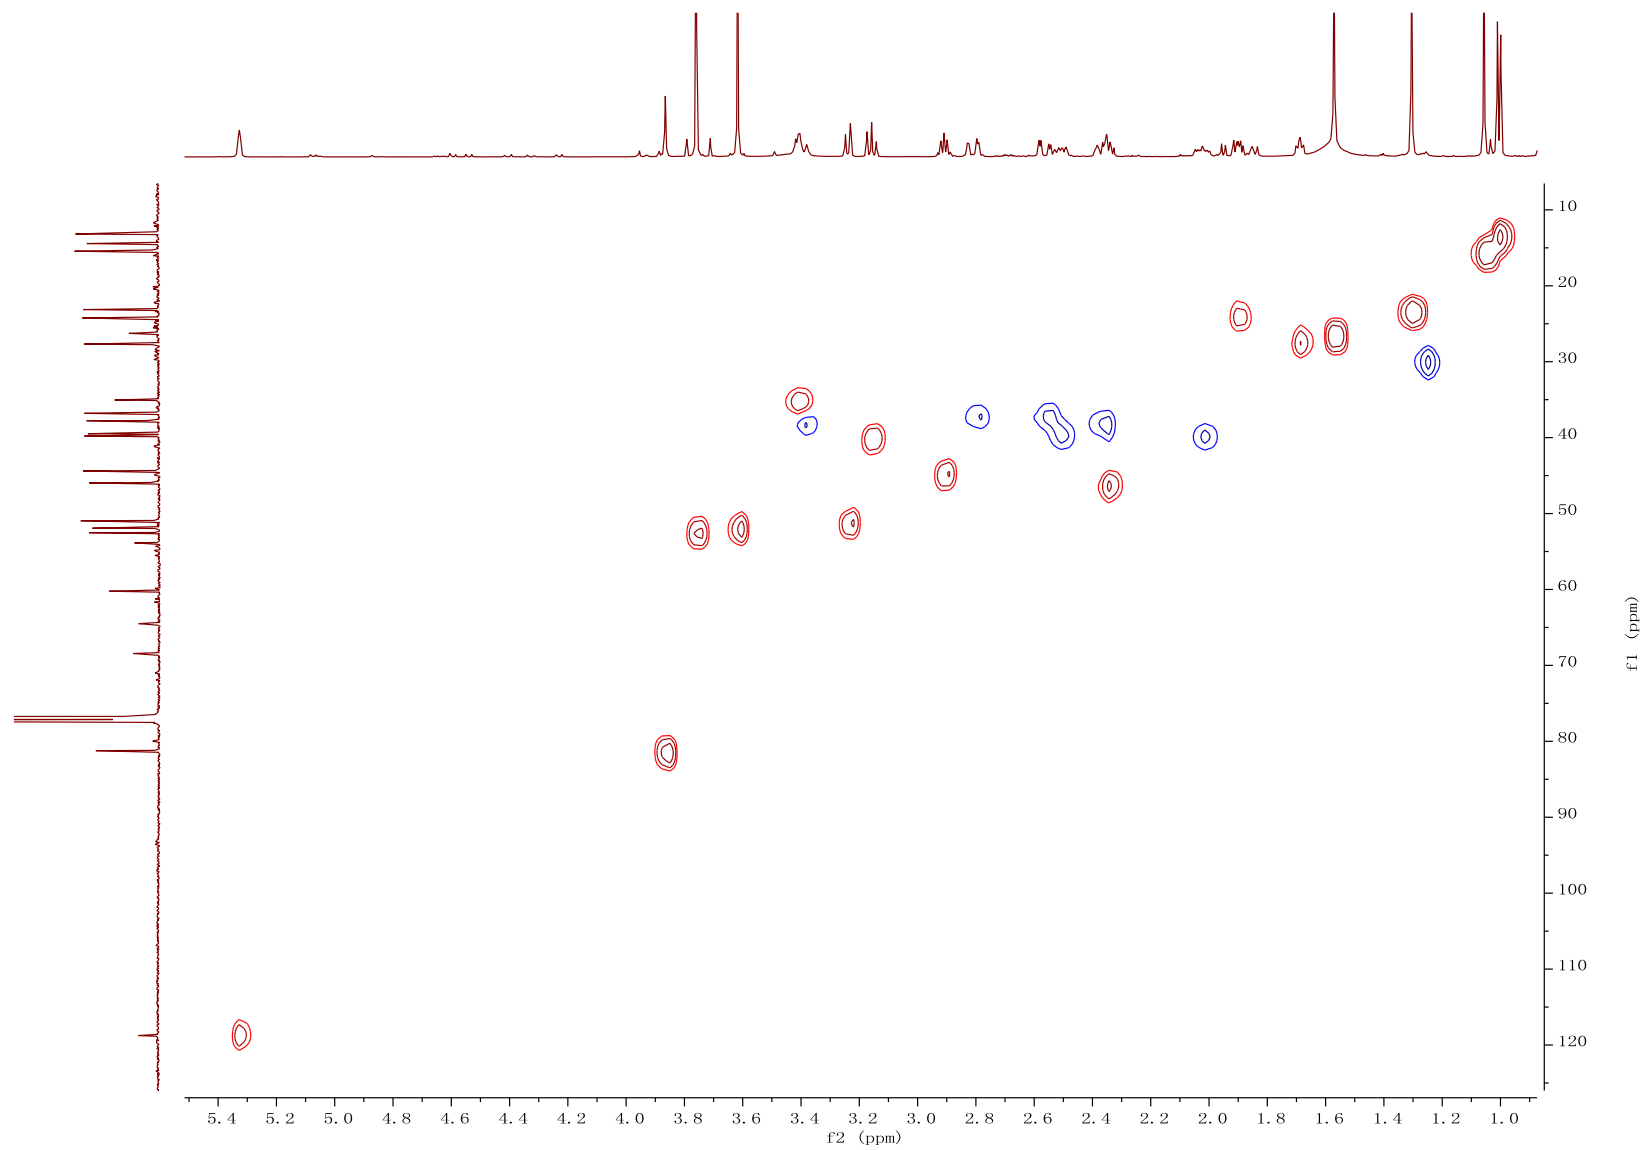

**Figure S25.** HMBC spectrum of chlorahupetone C (**3**) in CDCl<sub>3</sub>

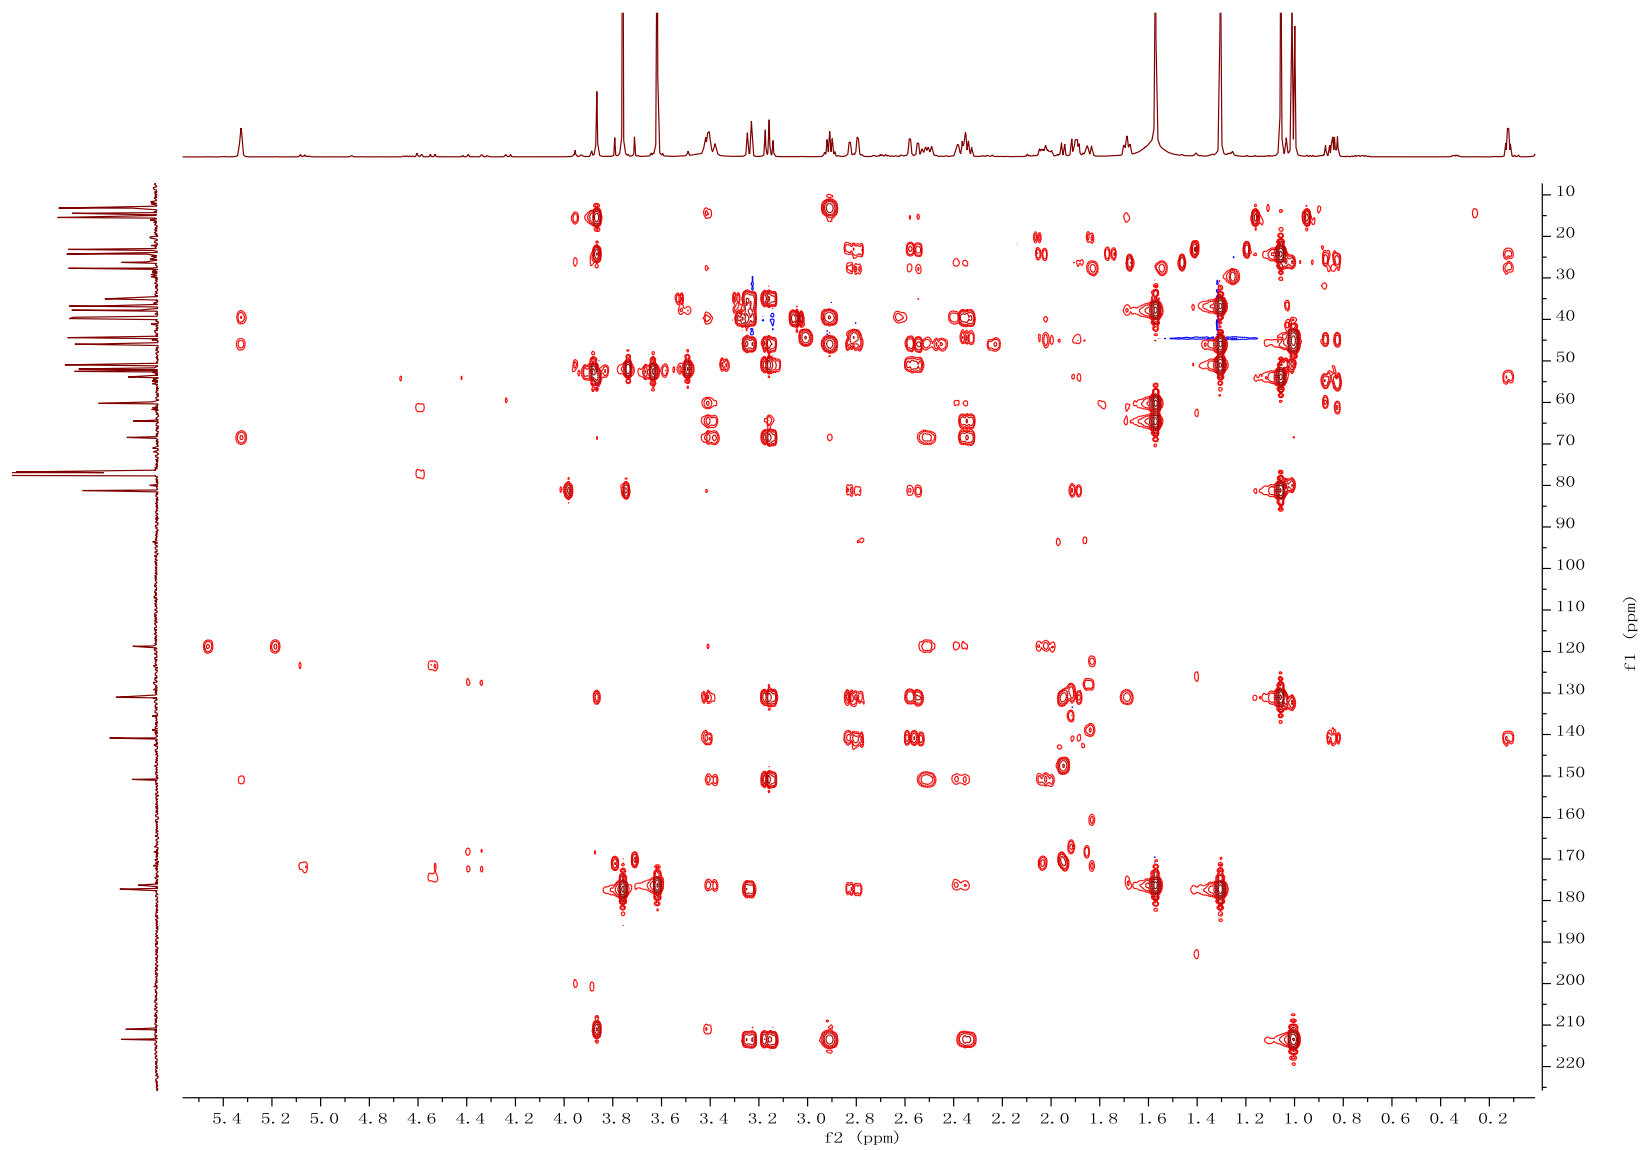

**Figure S26.**  $^1\text{H}$ - $^1\text{H}$  COSY spectrum of chlorahupetone C (**3**) in  $\text{CDCl}_3$

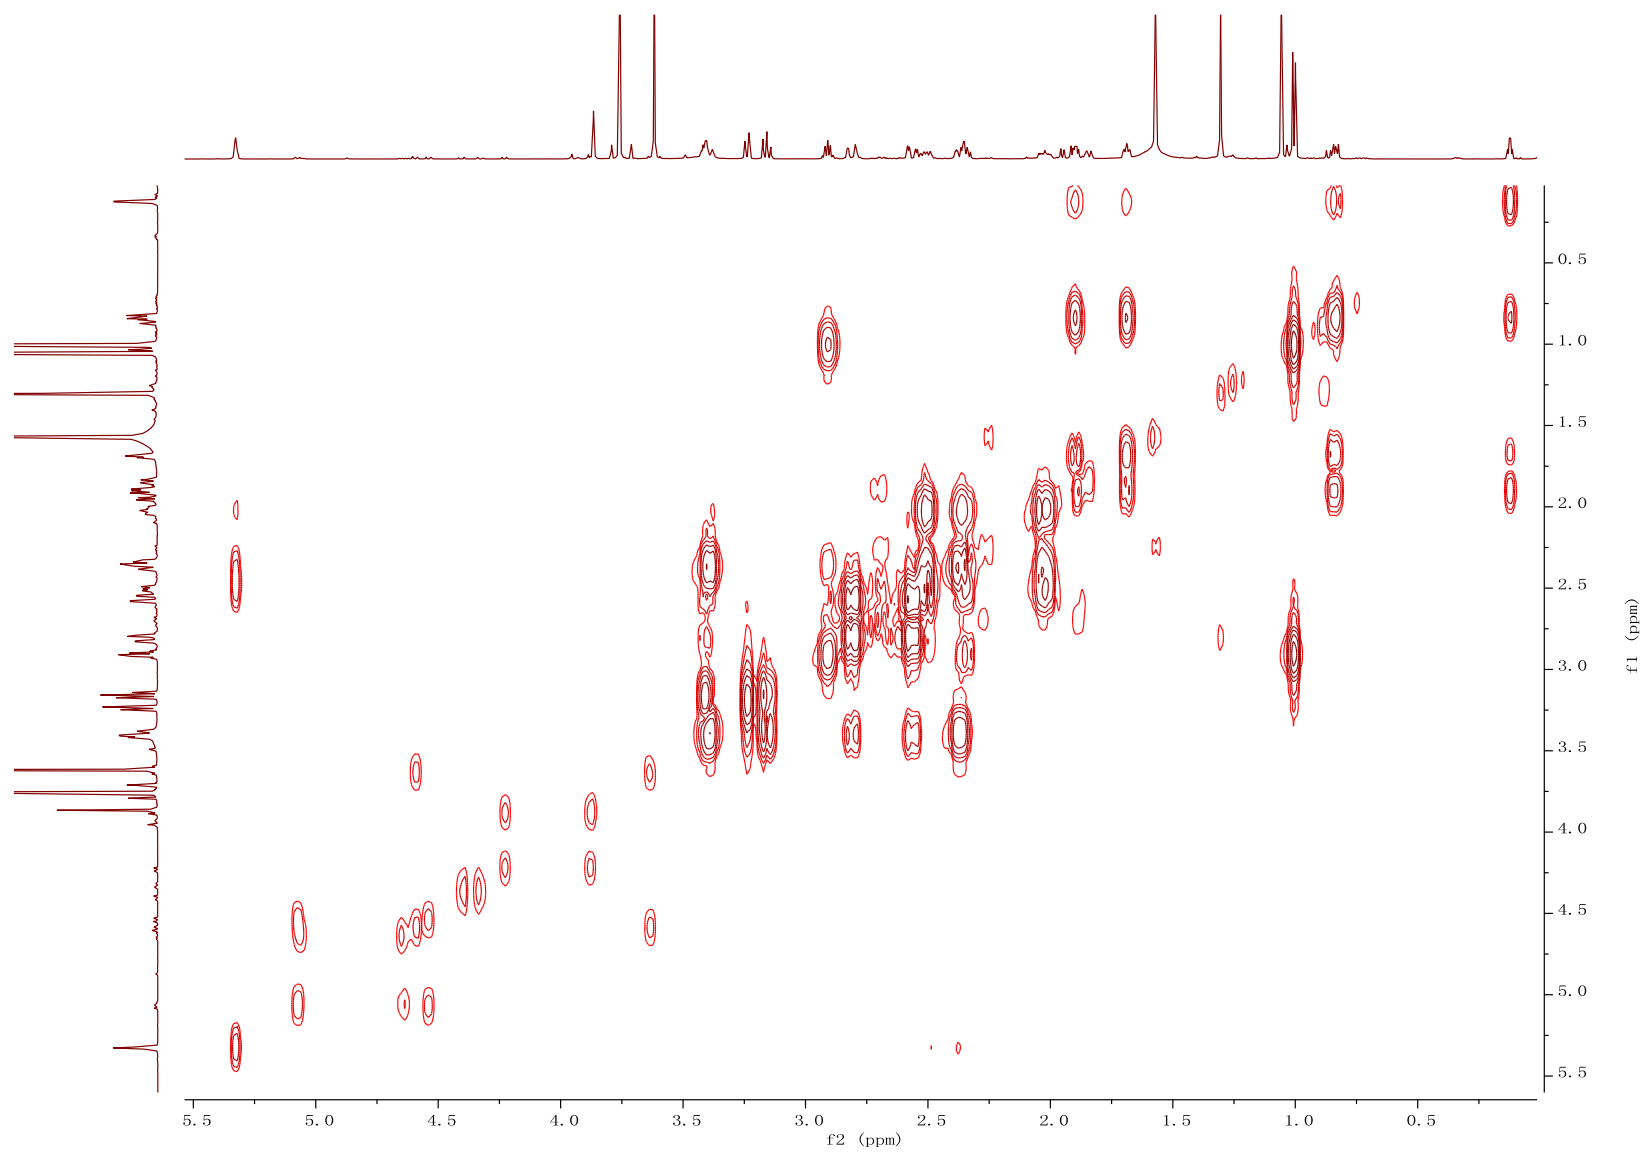

**Figure S27.** NOESY spectrum of chlorahupetone C (**3**) in CDCl<sub>3</sub>

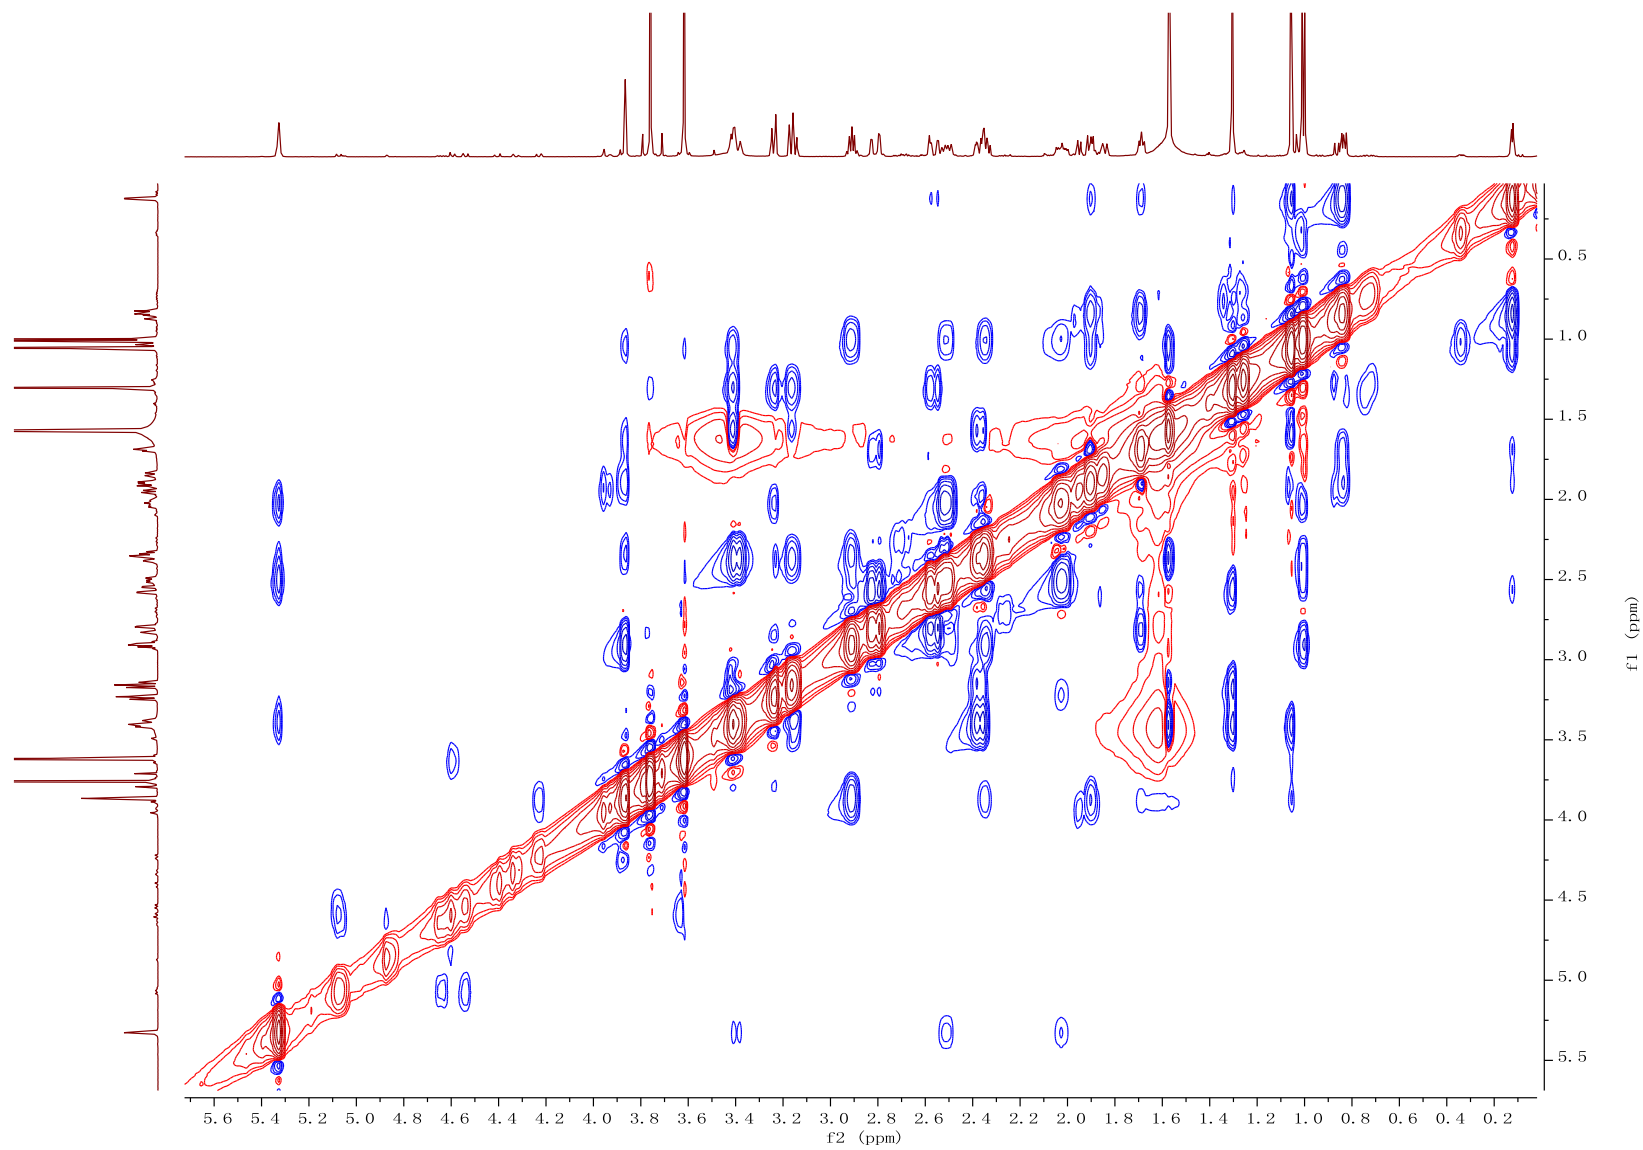



Figure S28. (+)-HRESIMS spectrum of chlorahupetone C (3)

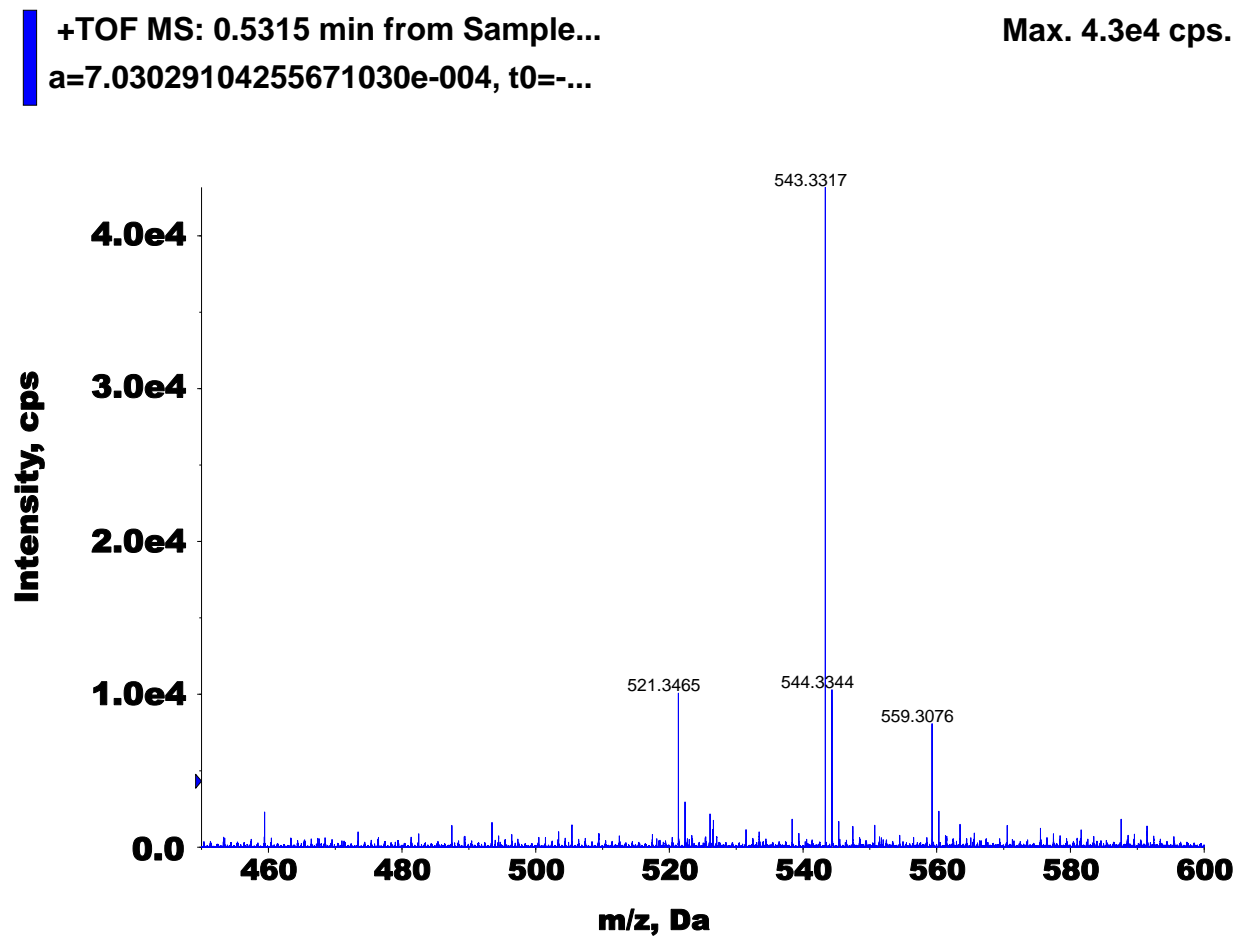

Figure S29. IR spectrum of chlorahupetone C (3)

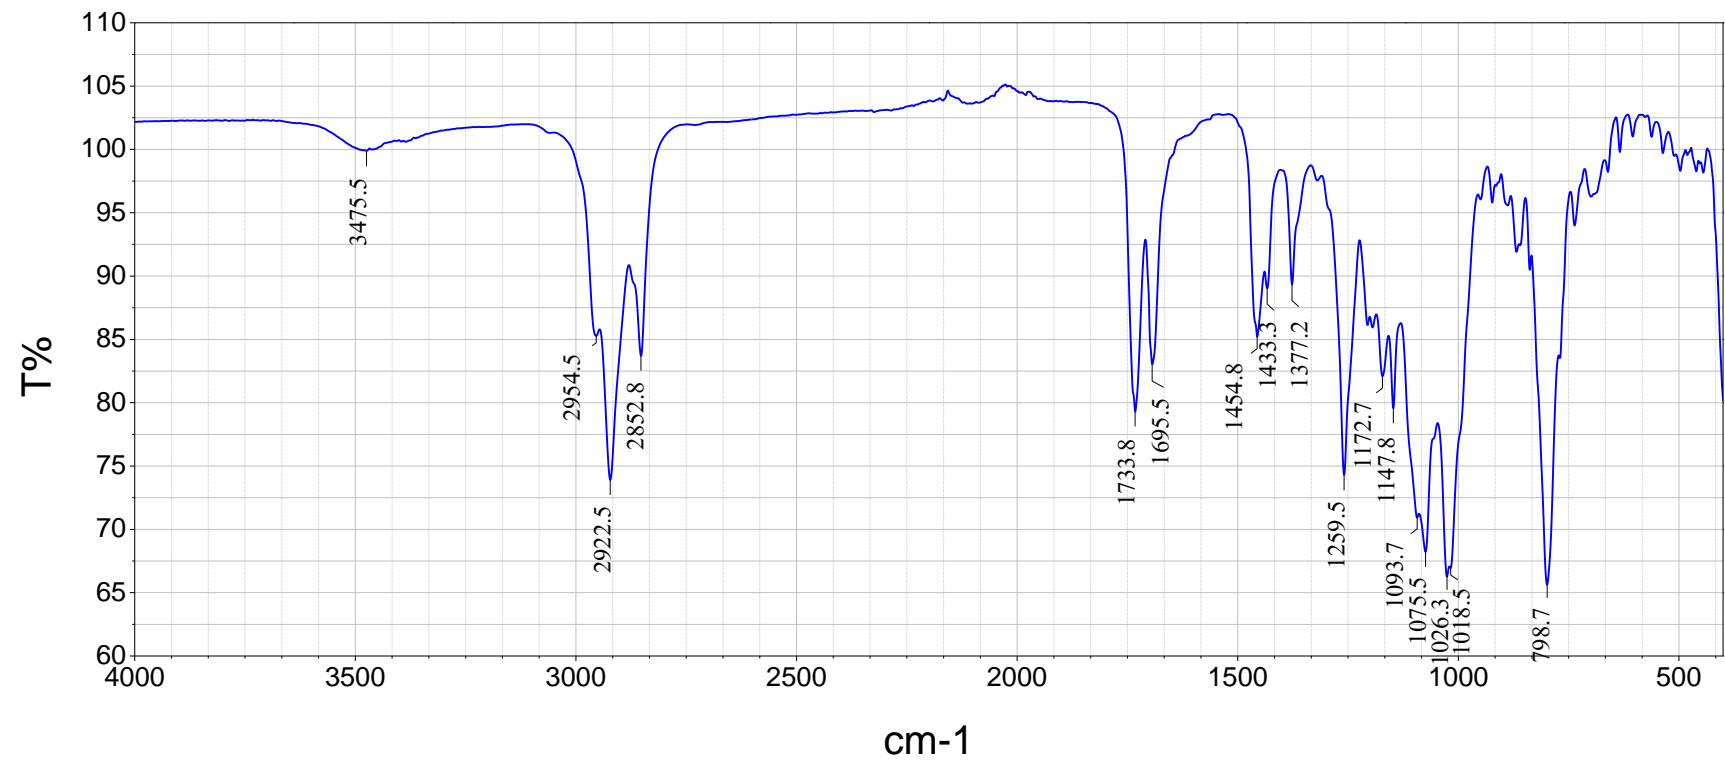

Figure S30. <sup>1</sup>H NMR spectrum of chlorahupetone D (4) in pyridine-*d*<sub>5</sub>

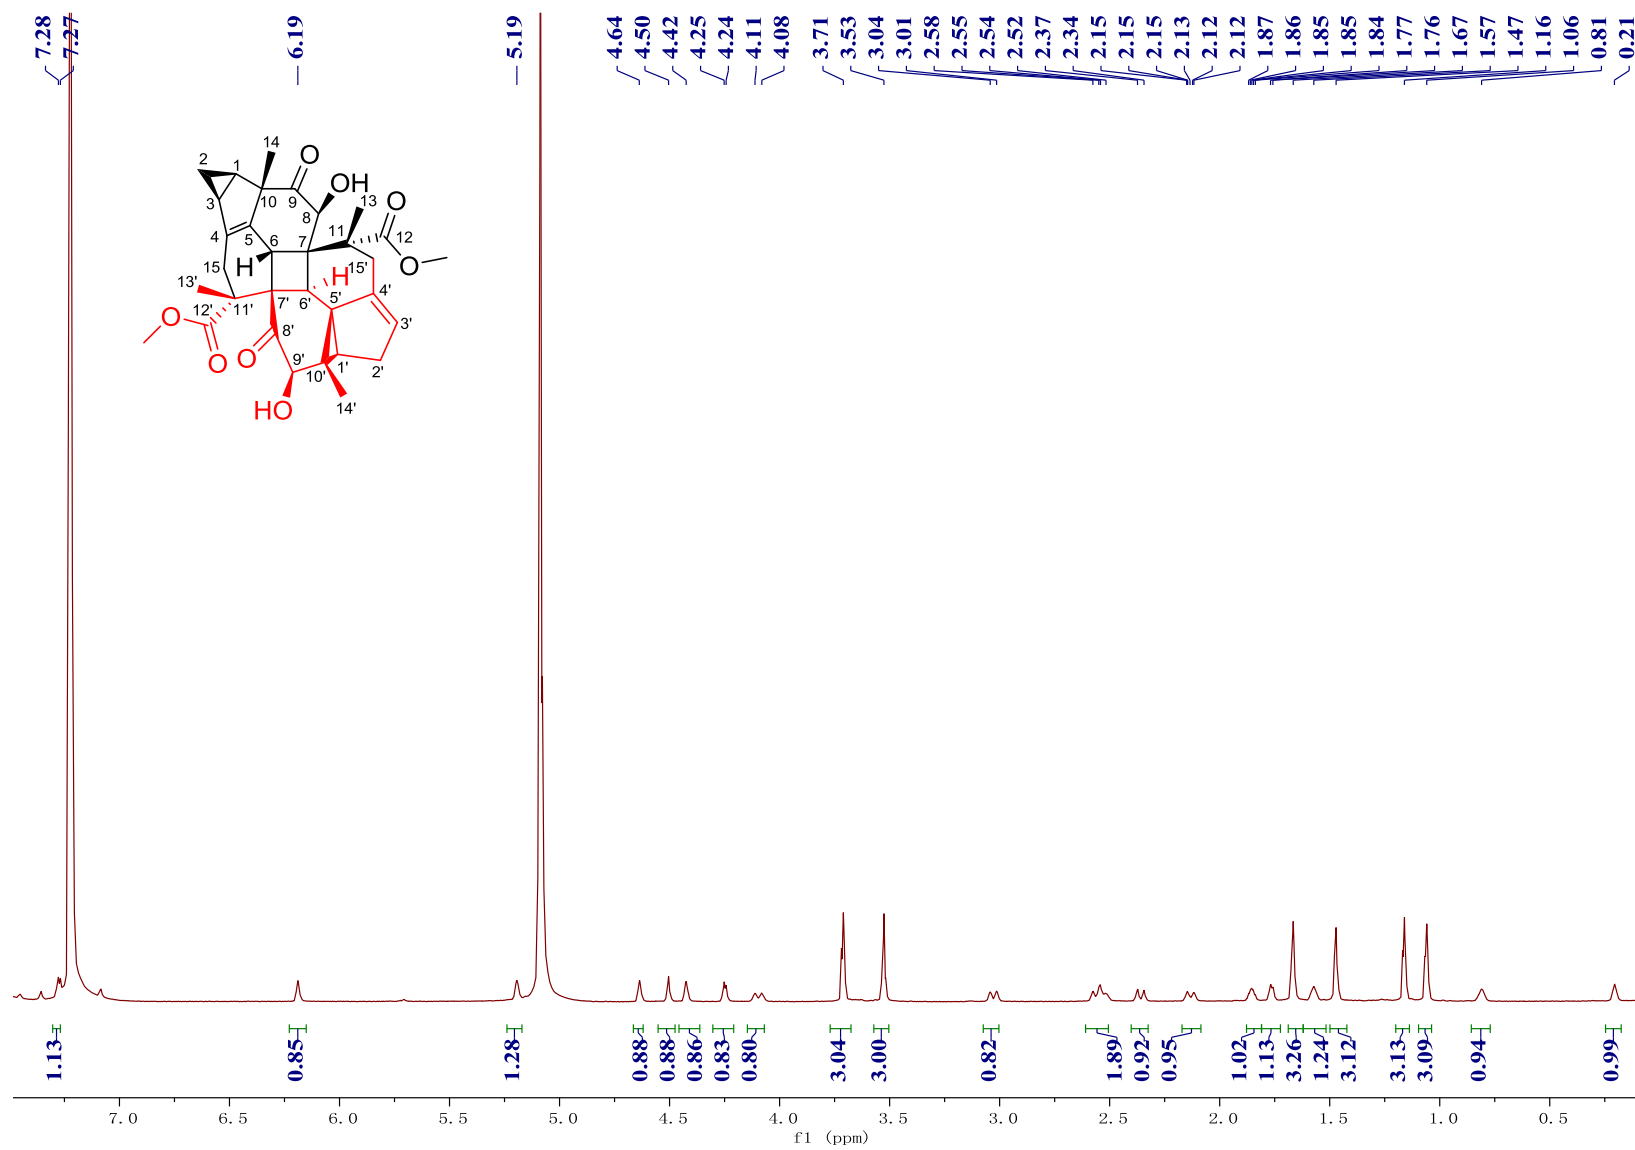

**Figure S31.**  $^{13}\text{C}$  NMR and DEPT spectrum of chlorahupetone D (**4**) in pyridine- $d_5$

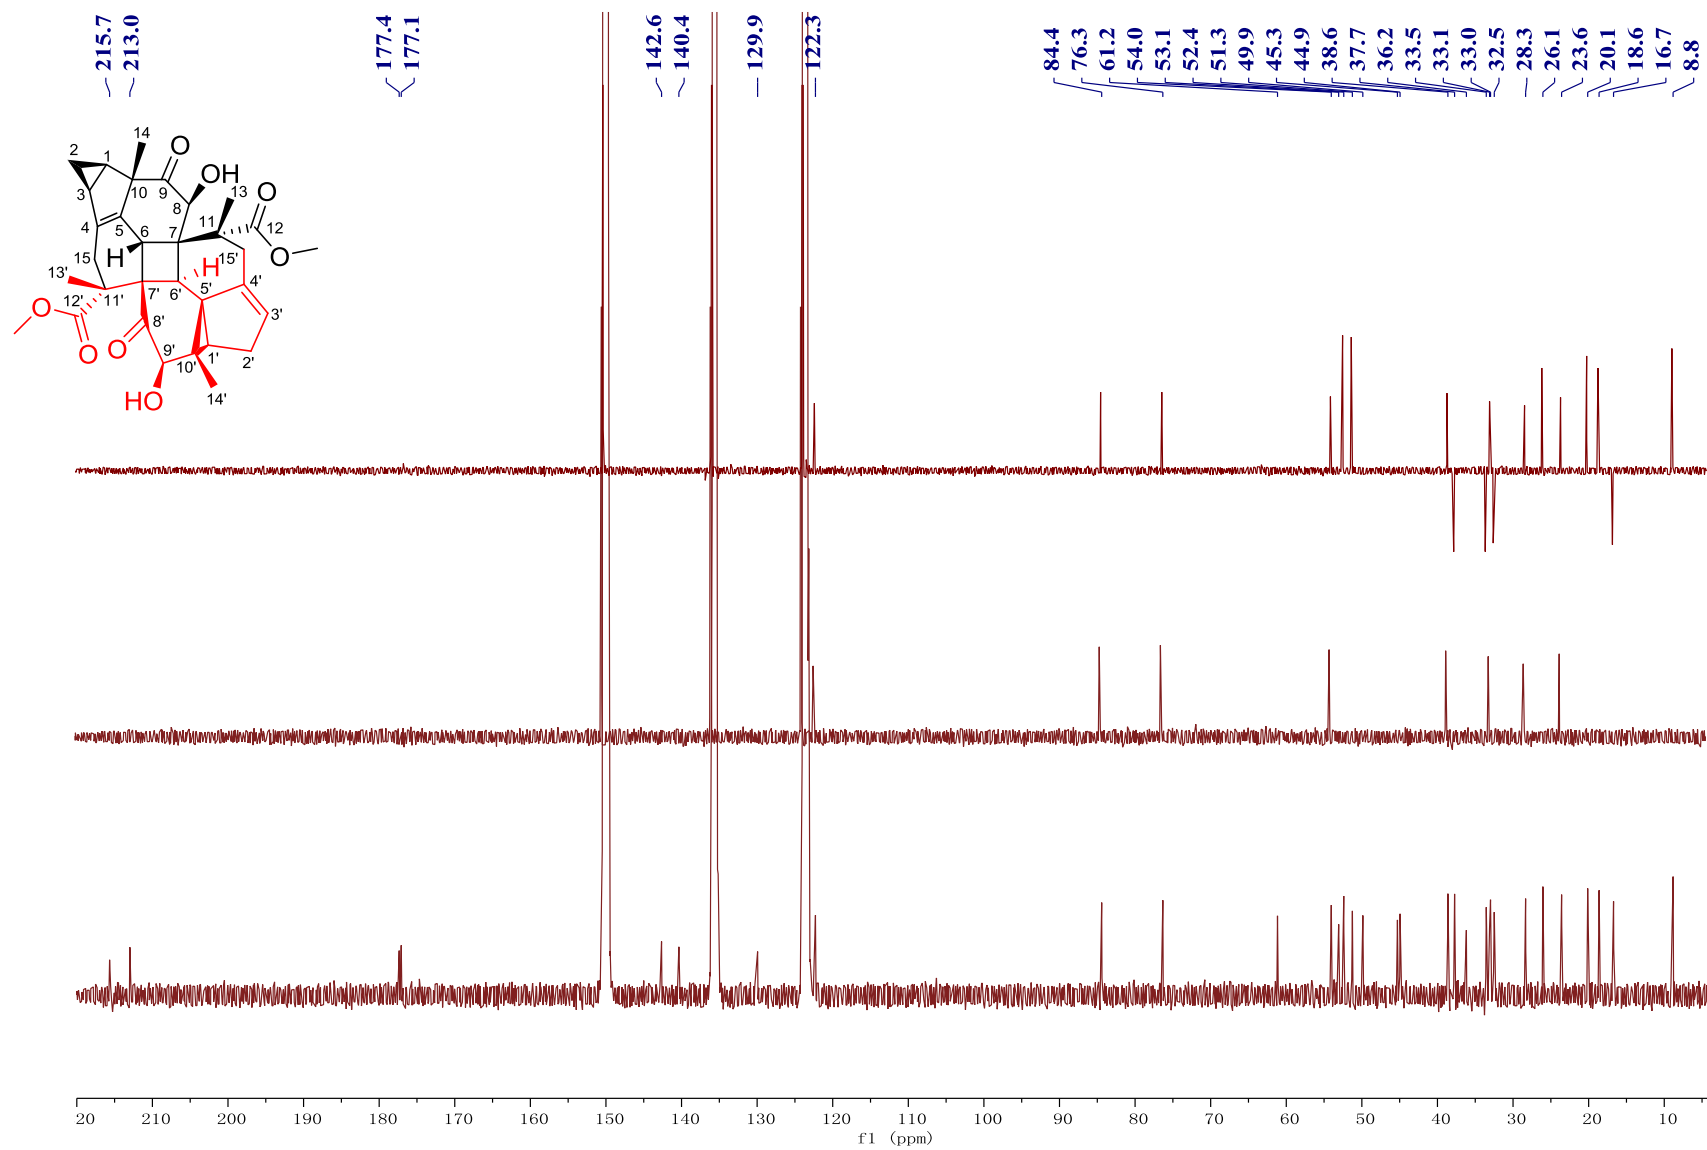

Figure S32. HSQC spectrum of chlorahupetone D (4) in pyridine-*d*<sub>5</sub>

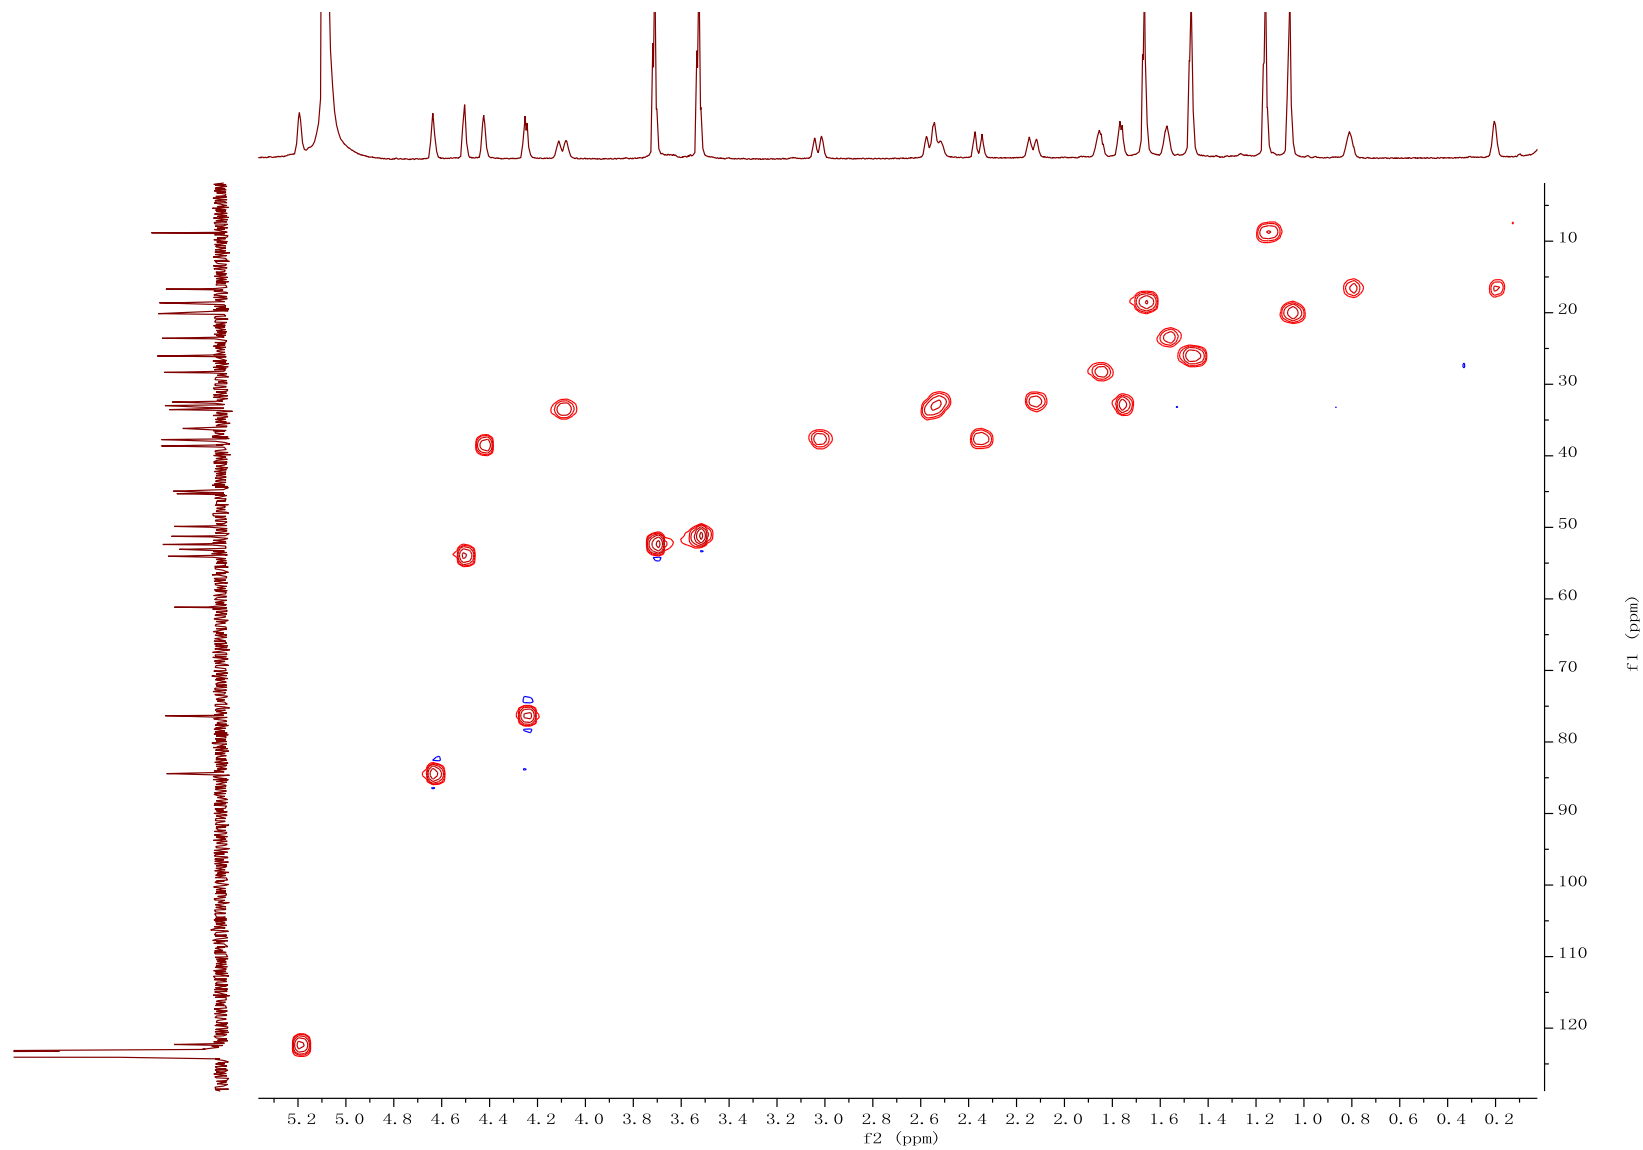

Figure S33. HMBC spectrum of chlorahupetone D (4) in pyridine-*d*<sub>5</sub>

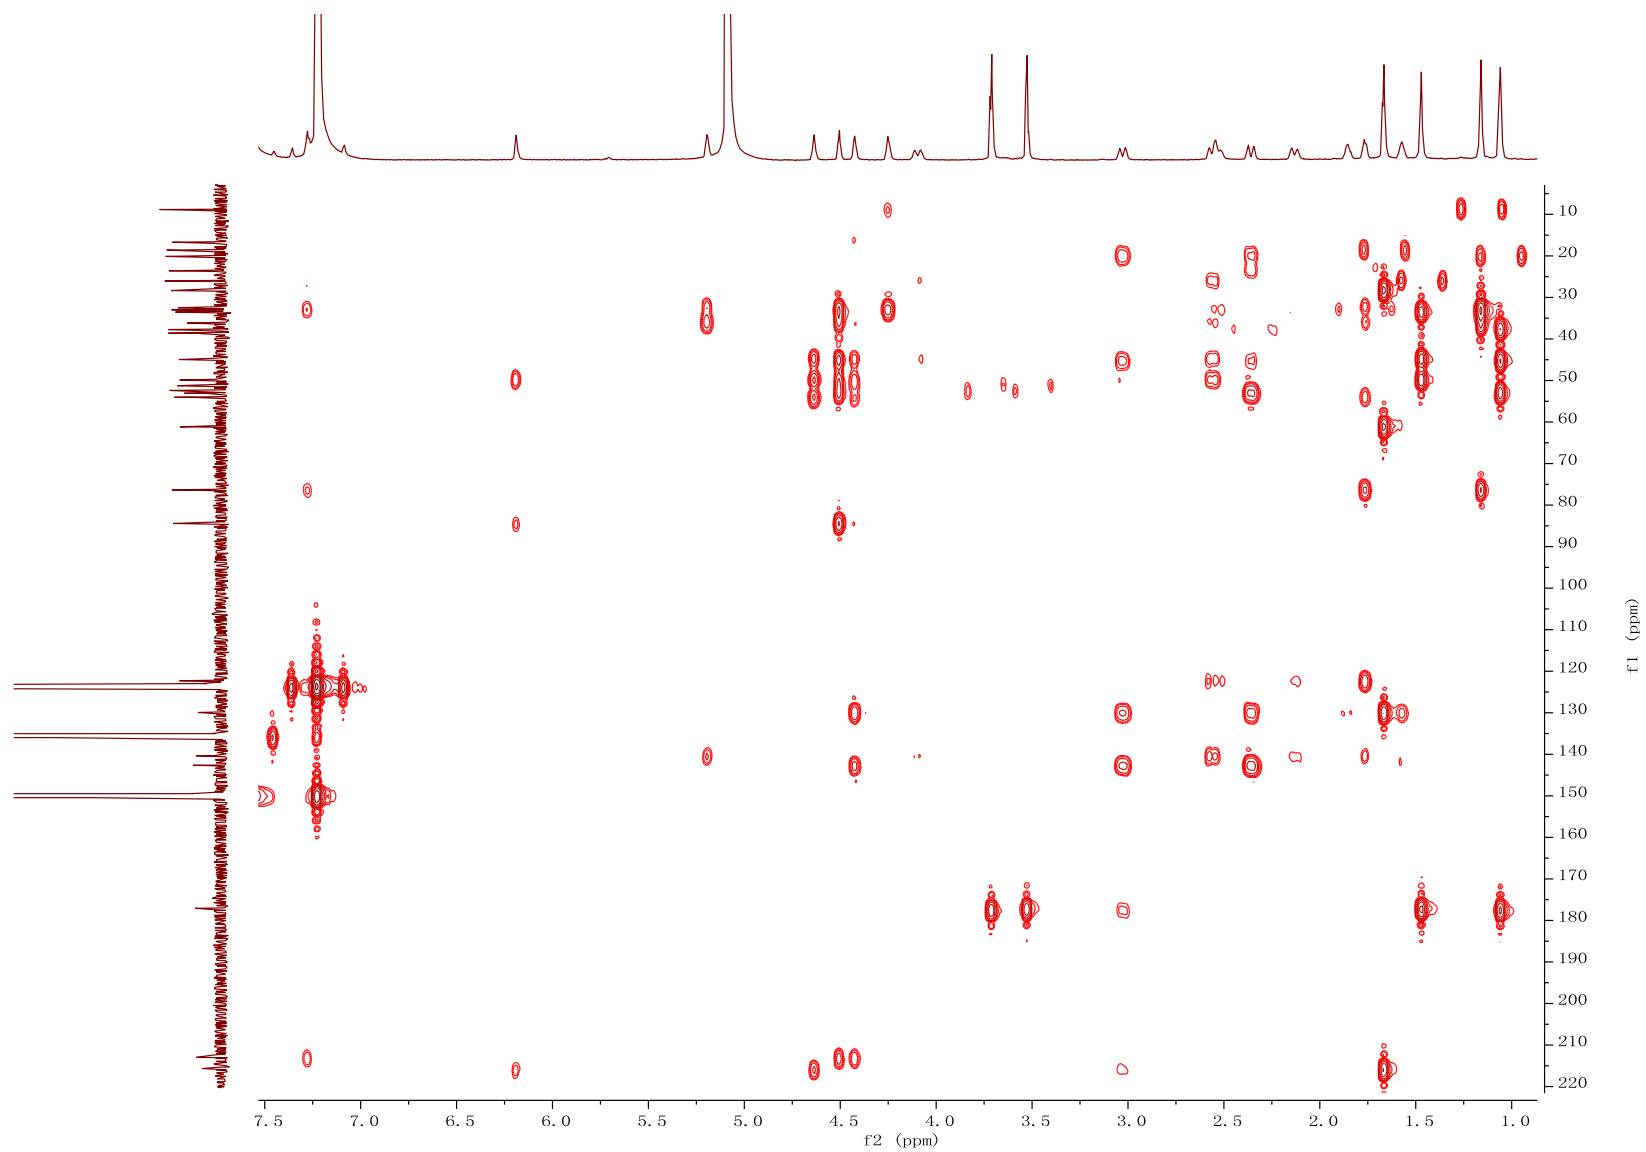

**Figure S34.**  $^1\text{H}$ - $^1\text{H}$  COSY spectrum of chlorahupetone D (**4**) in pyridine- $d_5$

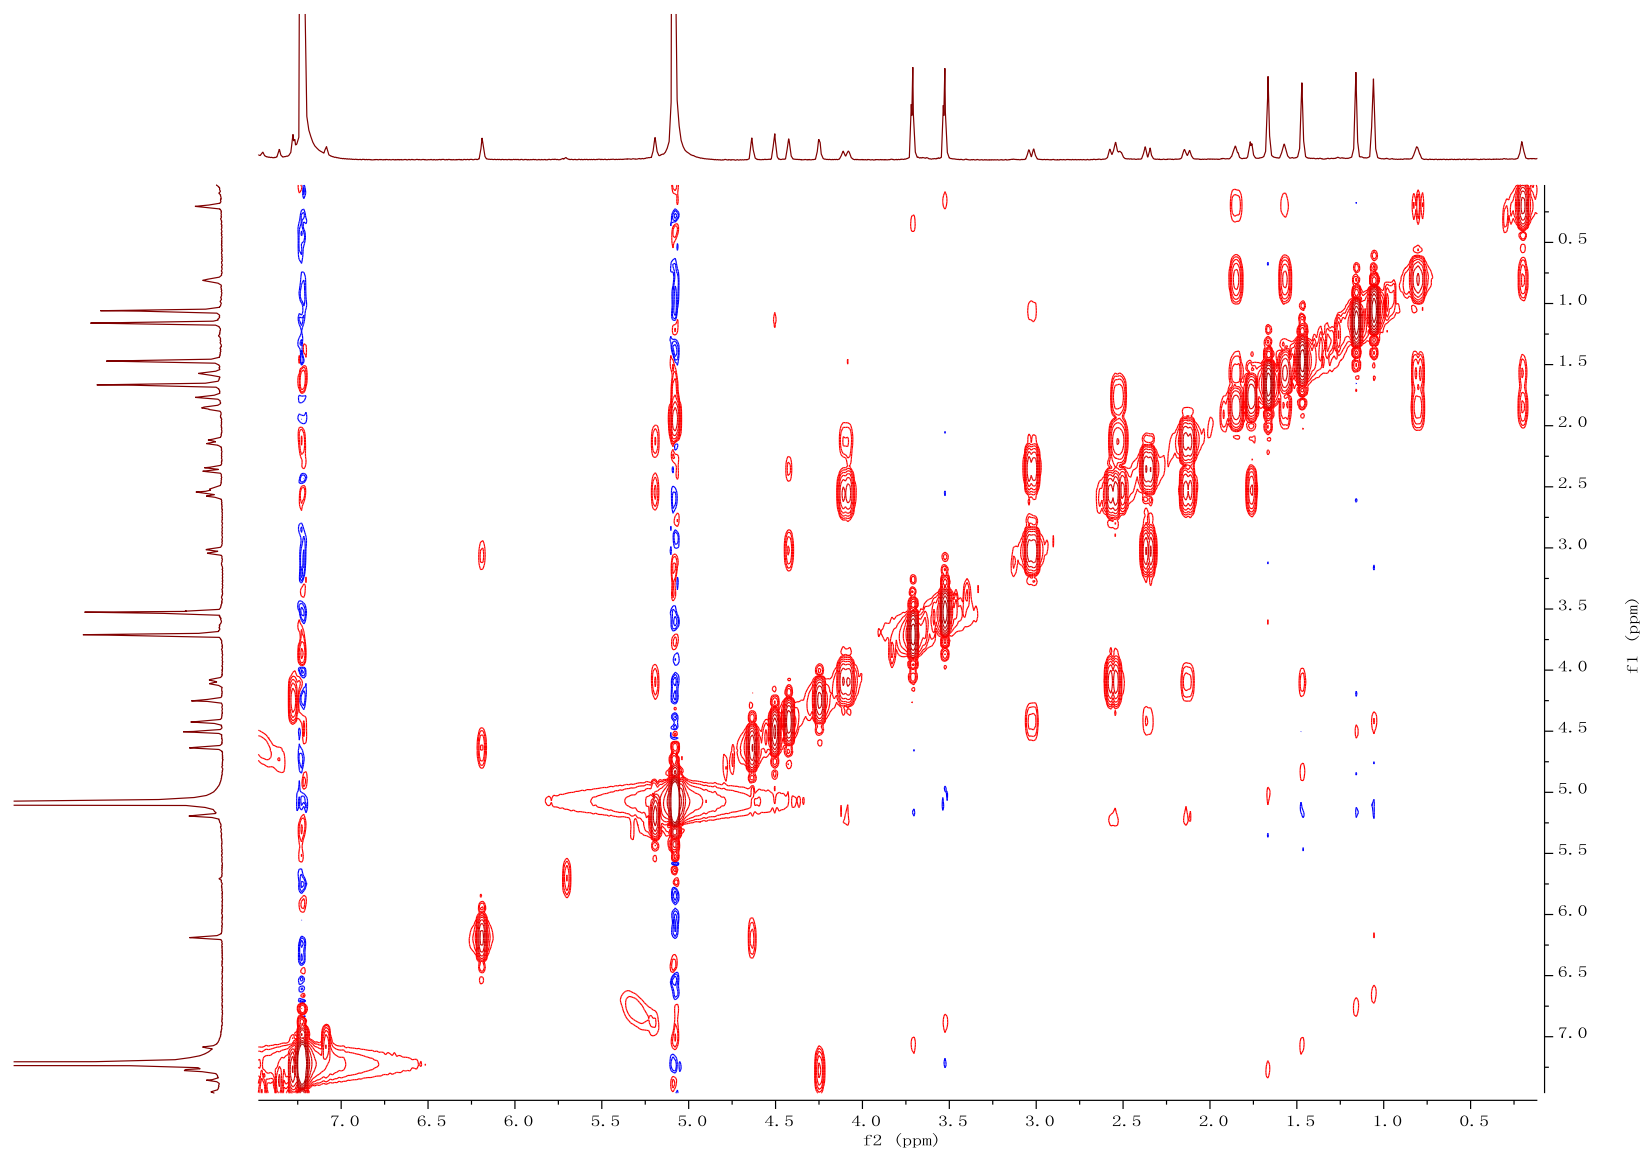

Figure S35. NOESY spectrum of chlorahupetone D (4) in pyridine-*d*<sub>5</sub>

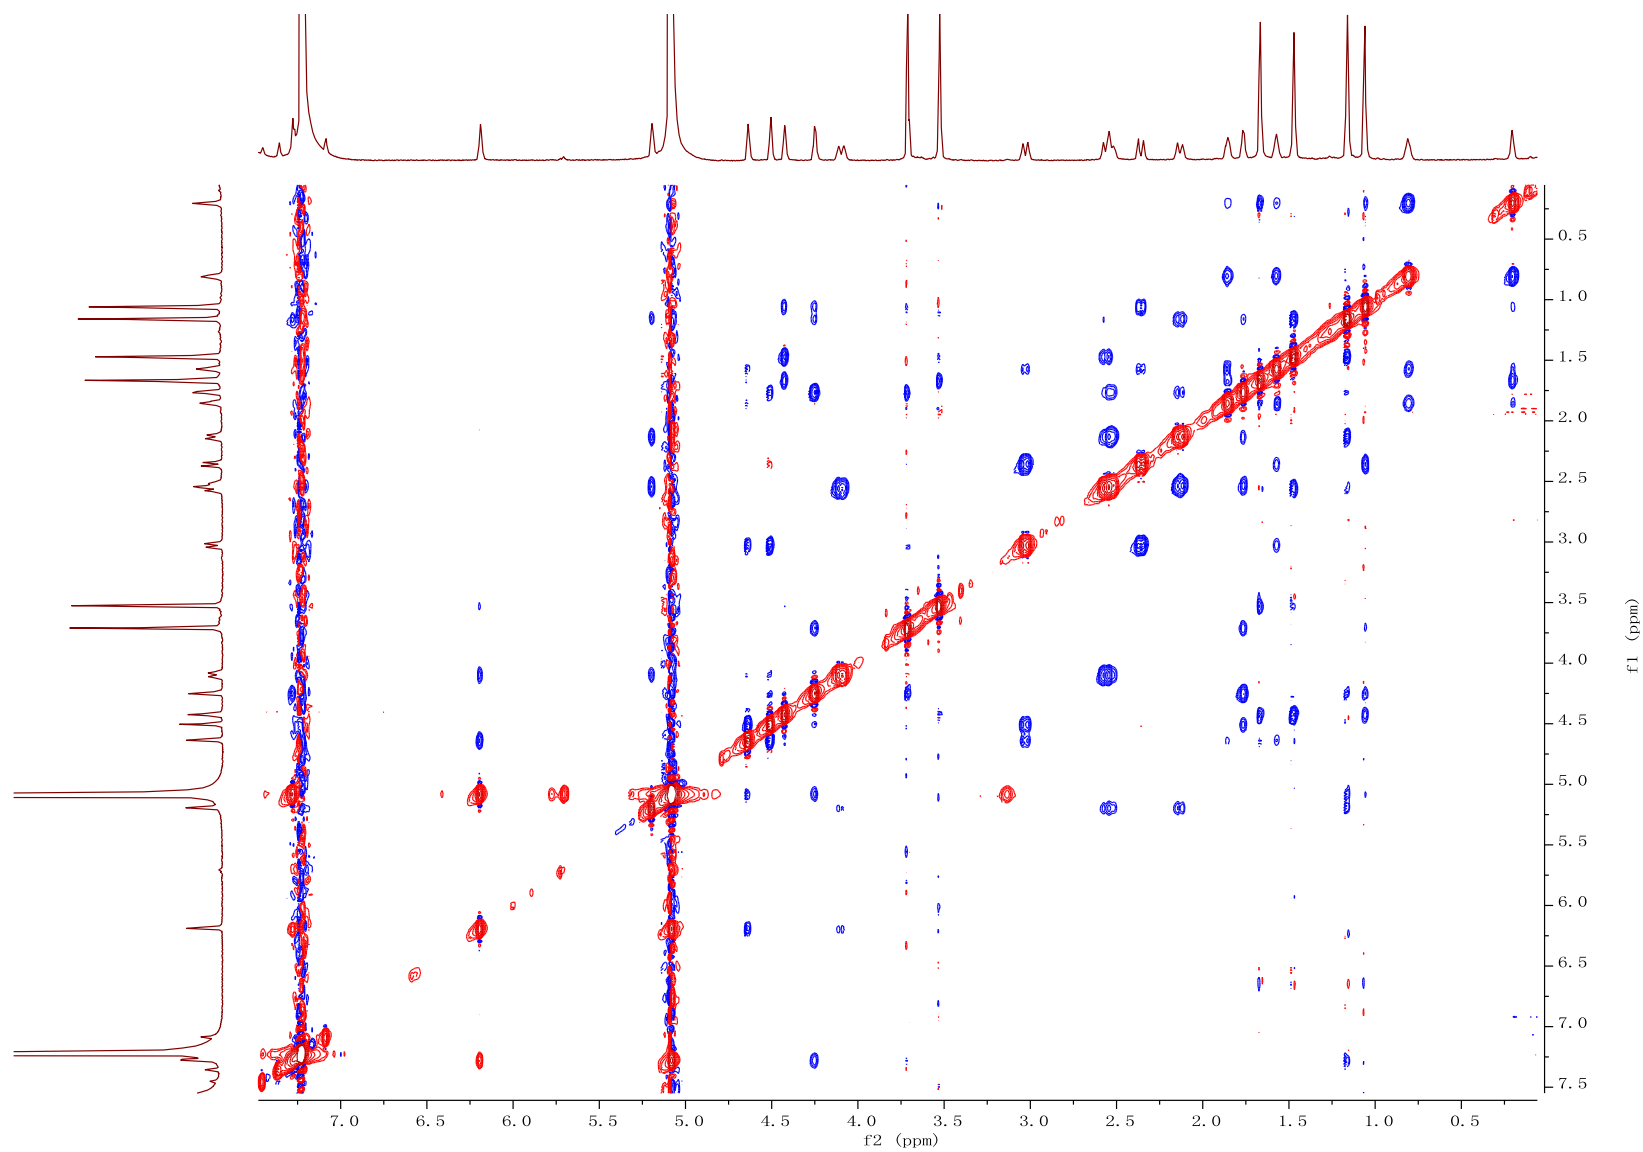



Figure S36. (+)-HRESIMS spectrum of chlorahupetone D (4)

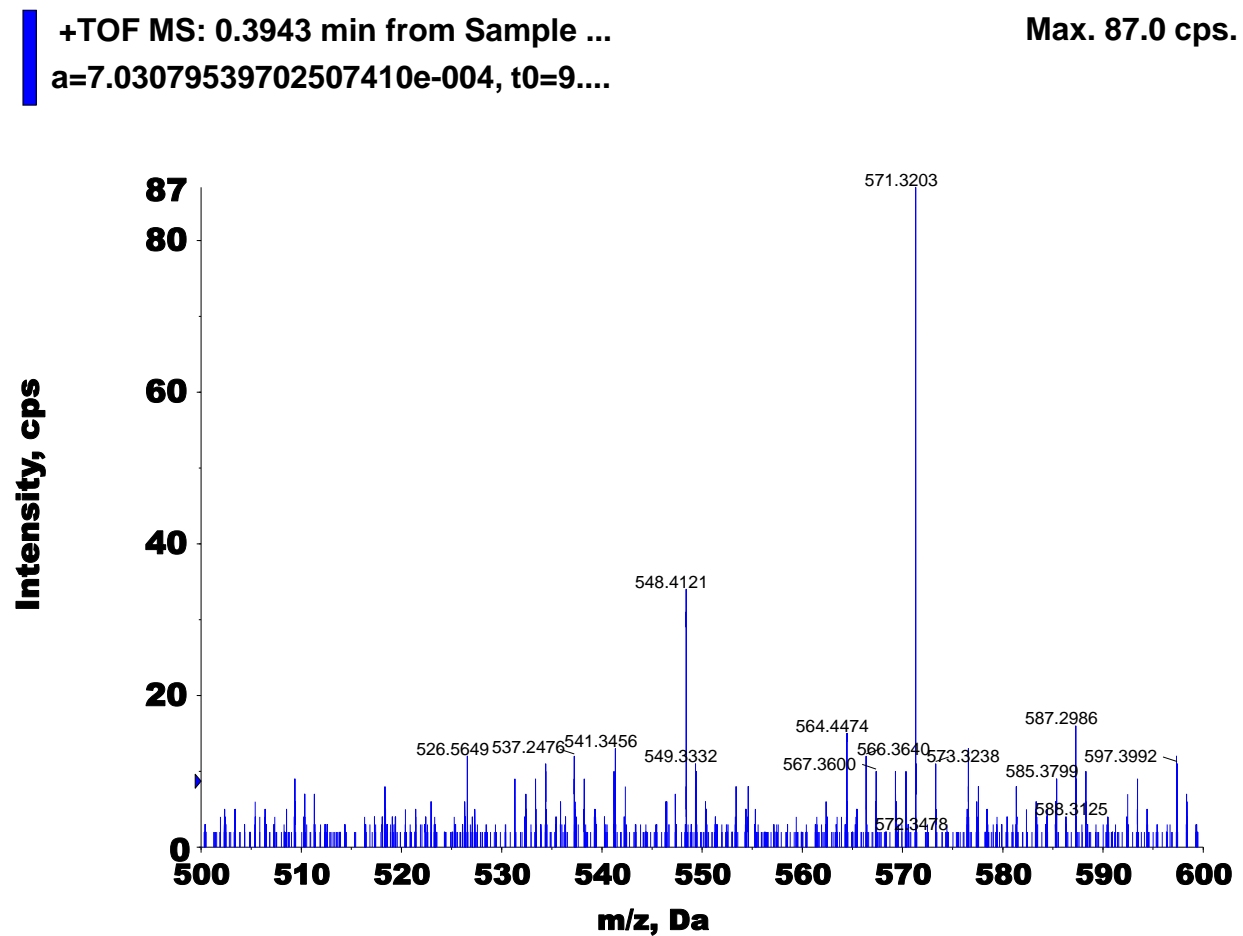

Figure S37. IR spectrum of chlorahupetone D (4)

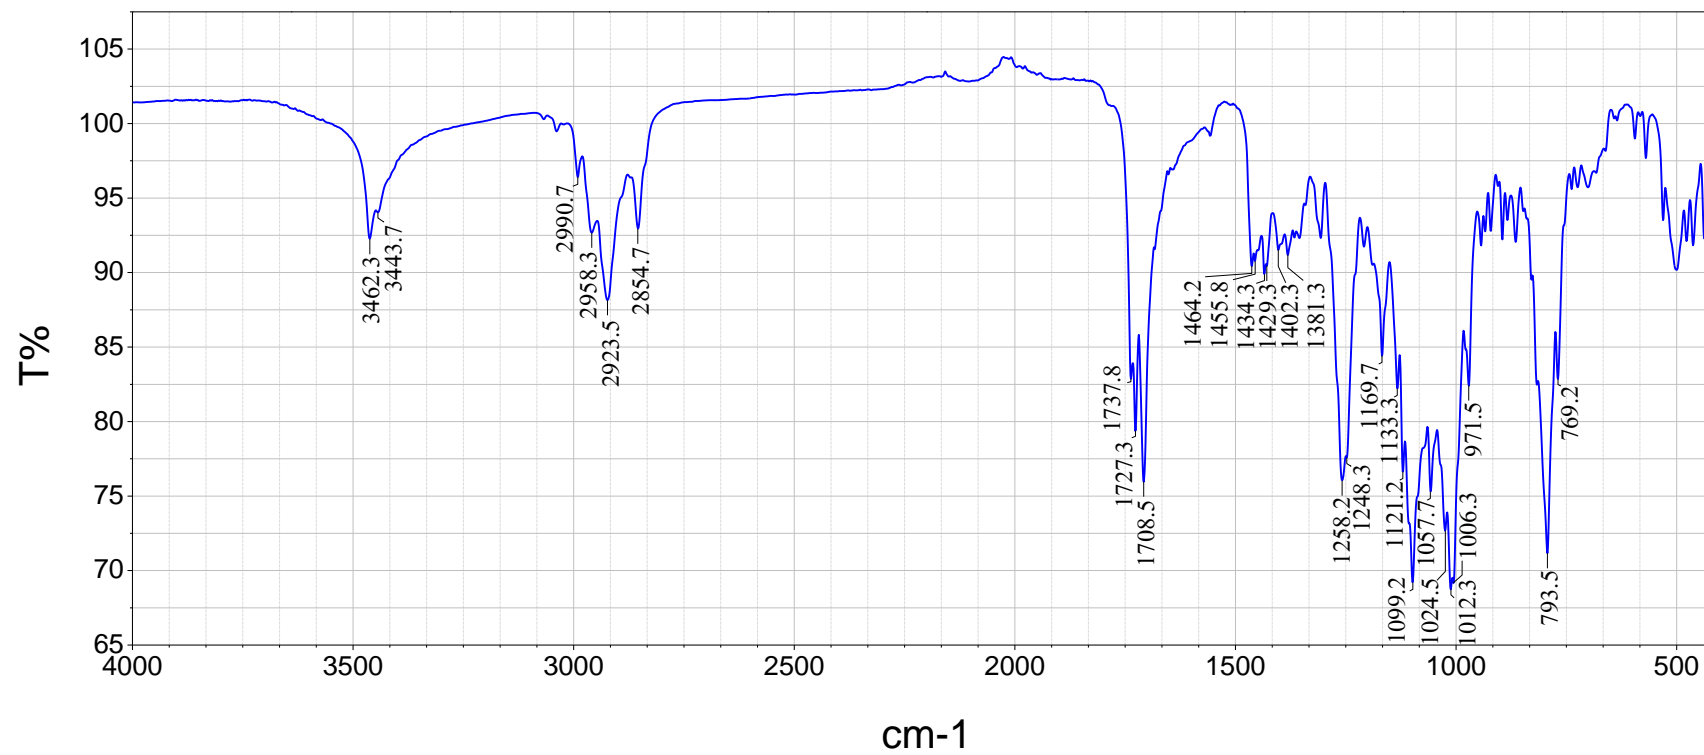

Figure S38. <sup>1</sup>H NMR spectrum of chlorahupetone E (5) in CDCl<sub>3</sub>

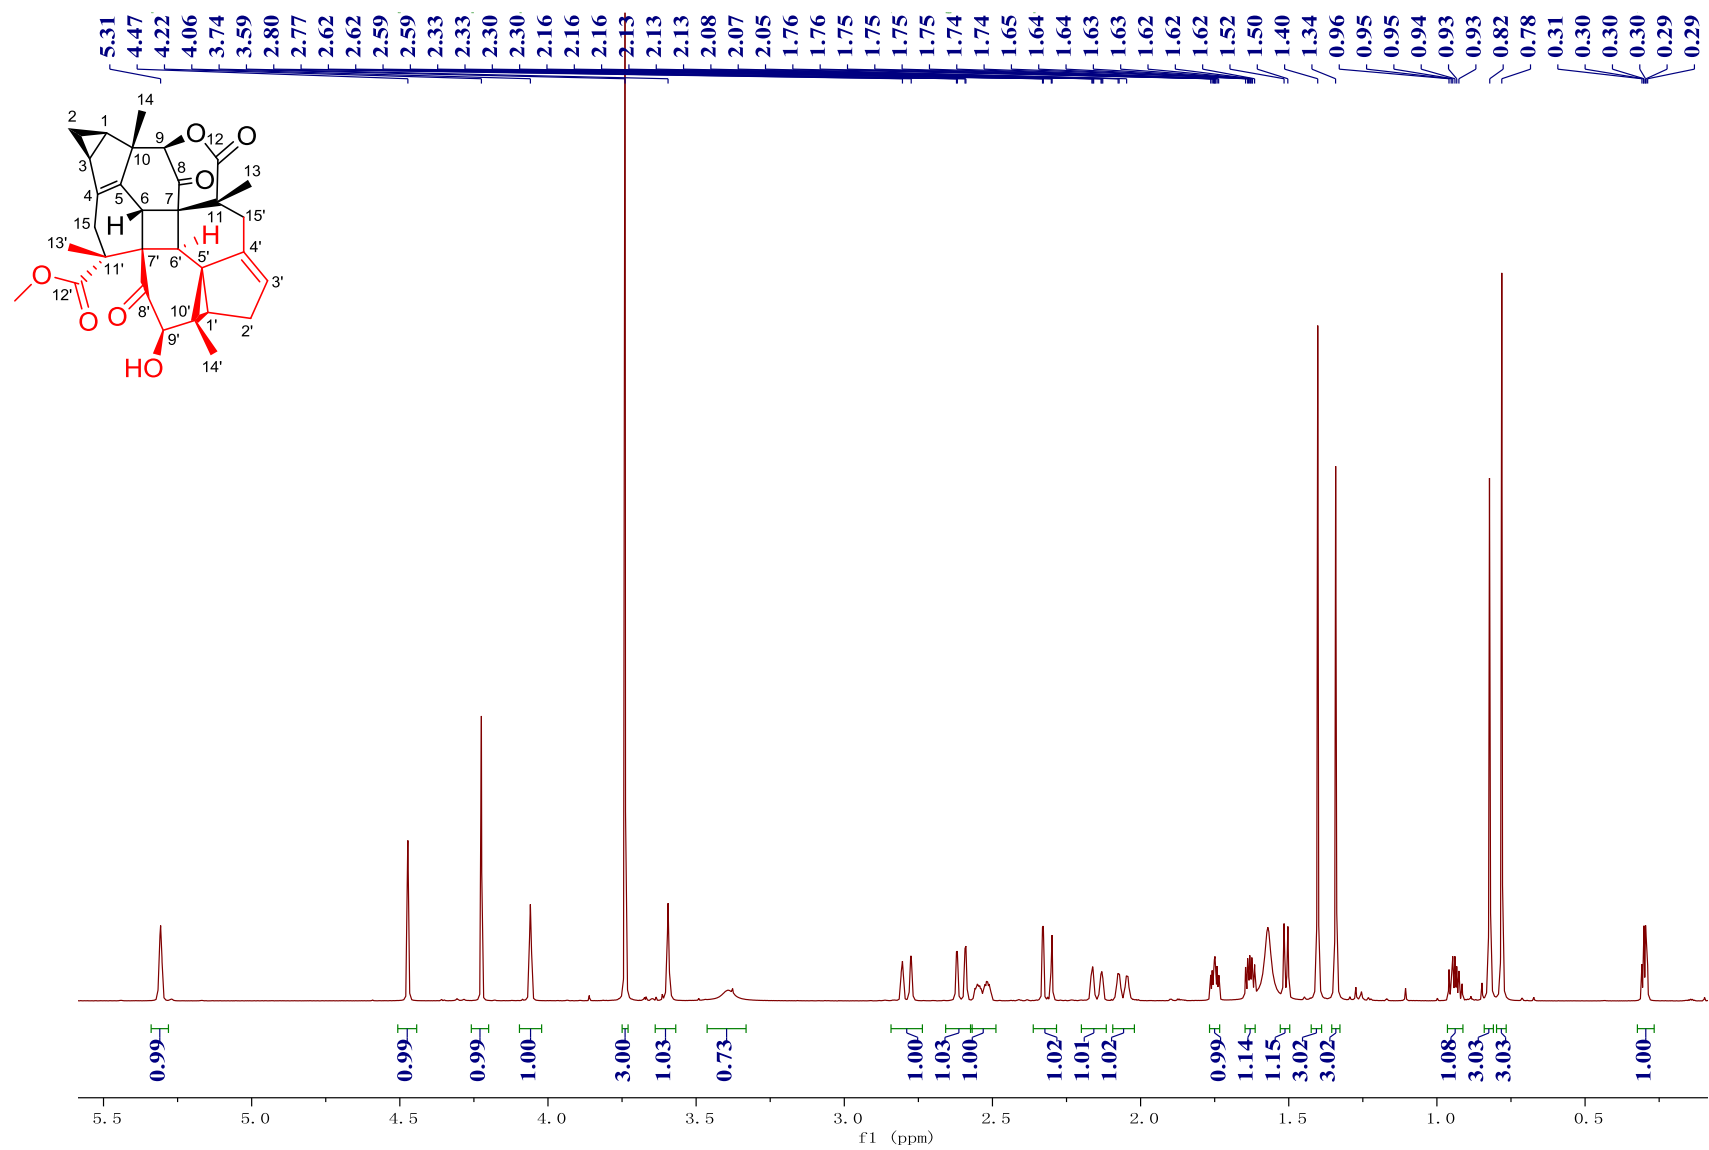

Figure S39.  $^{13}\text{C}$  NMR and DEPT spectrum of chlorahupetone E (**5**) in  $\text{CDCl}_3$

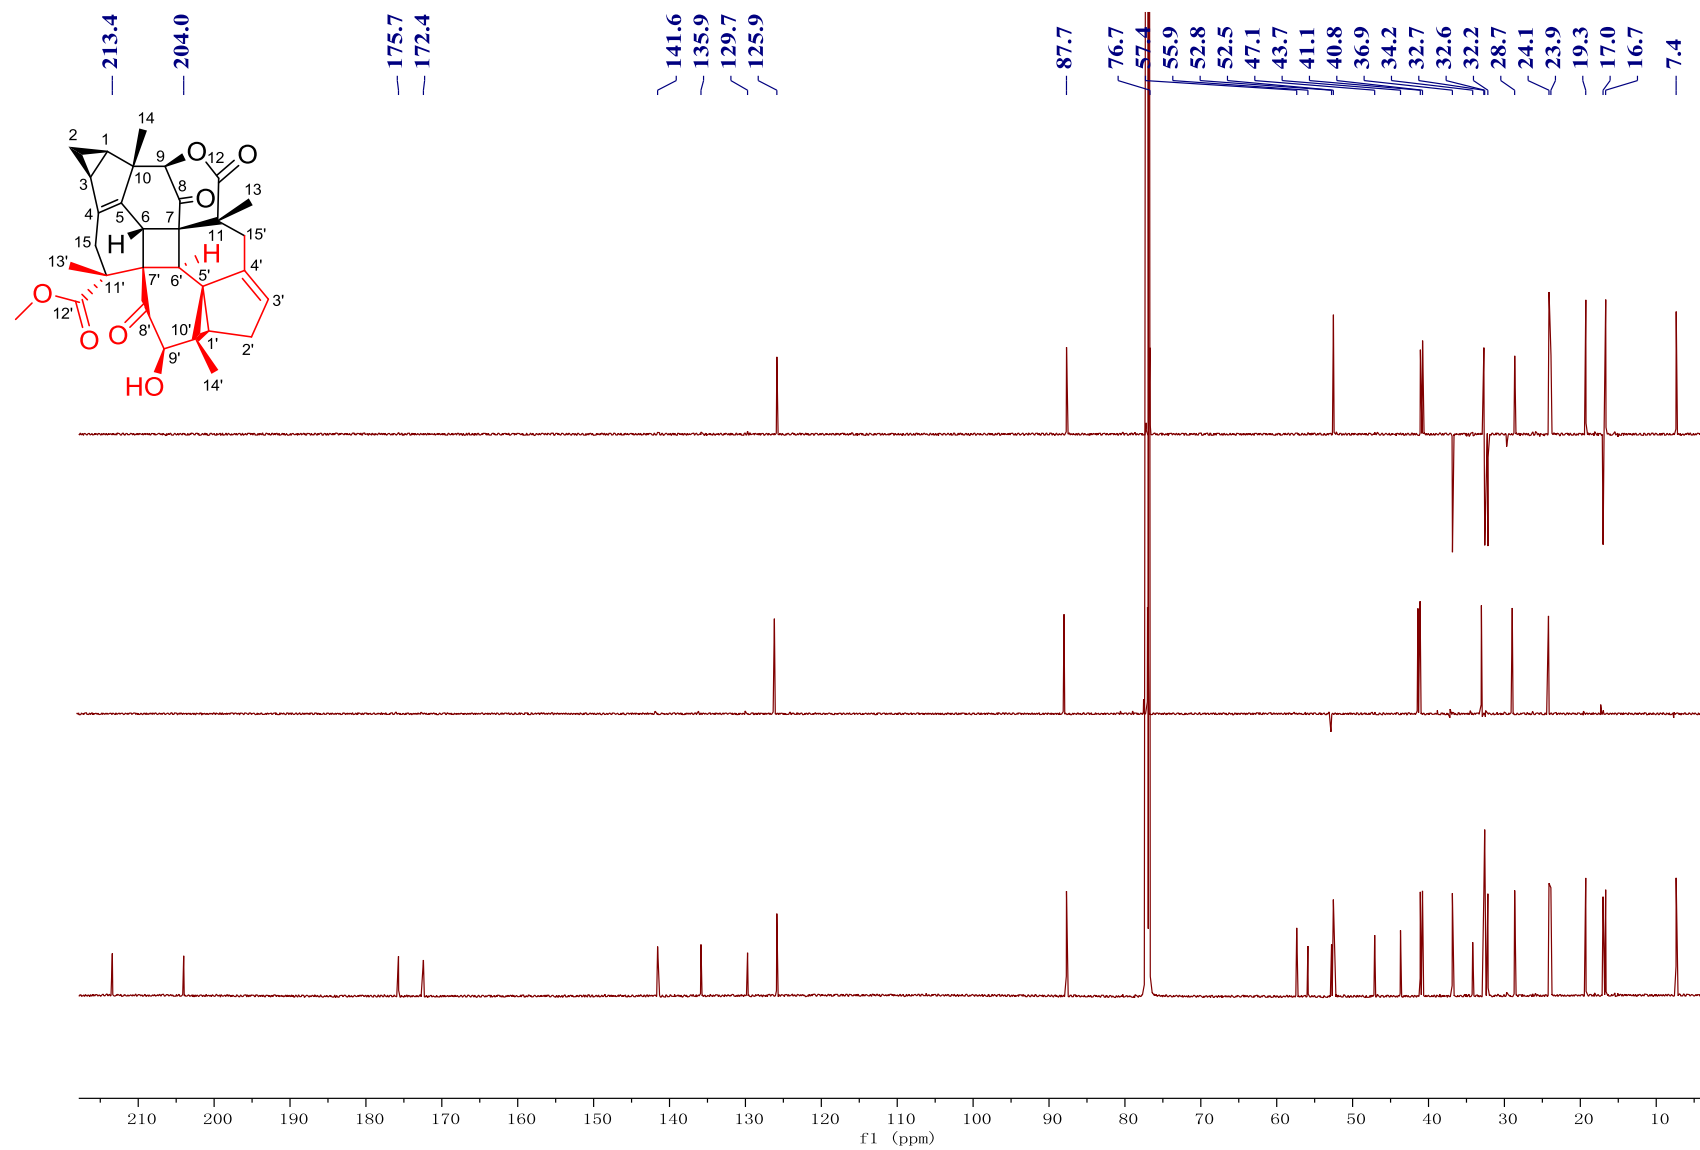

**Figure S40.** HSQC spectrum of chlorahupetone E (**5**) in CDCl<sub>3</sub>

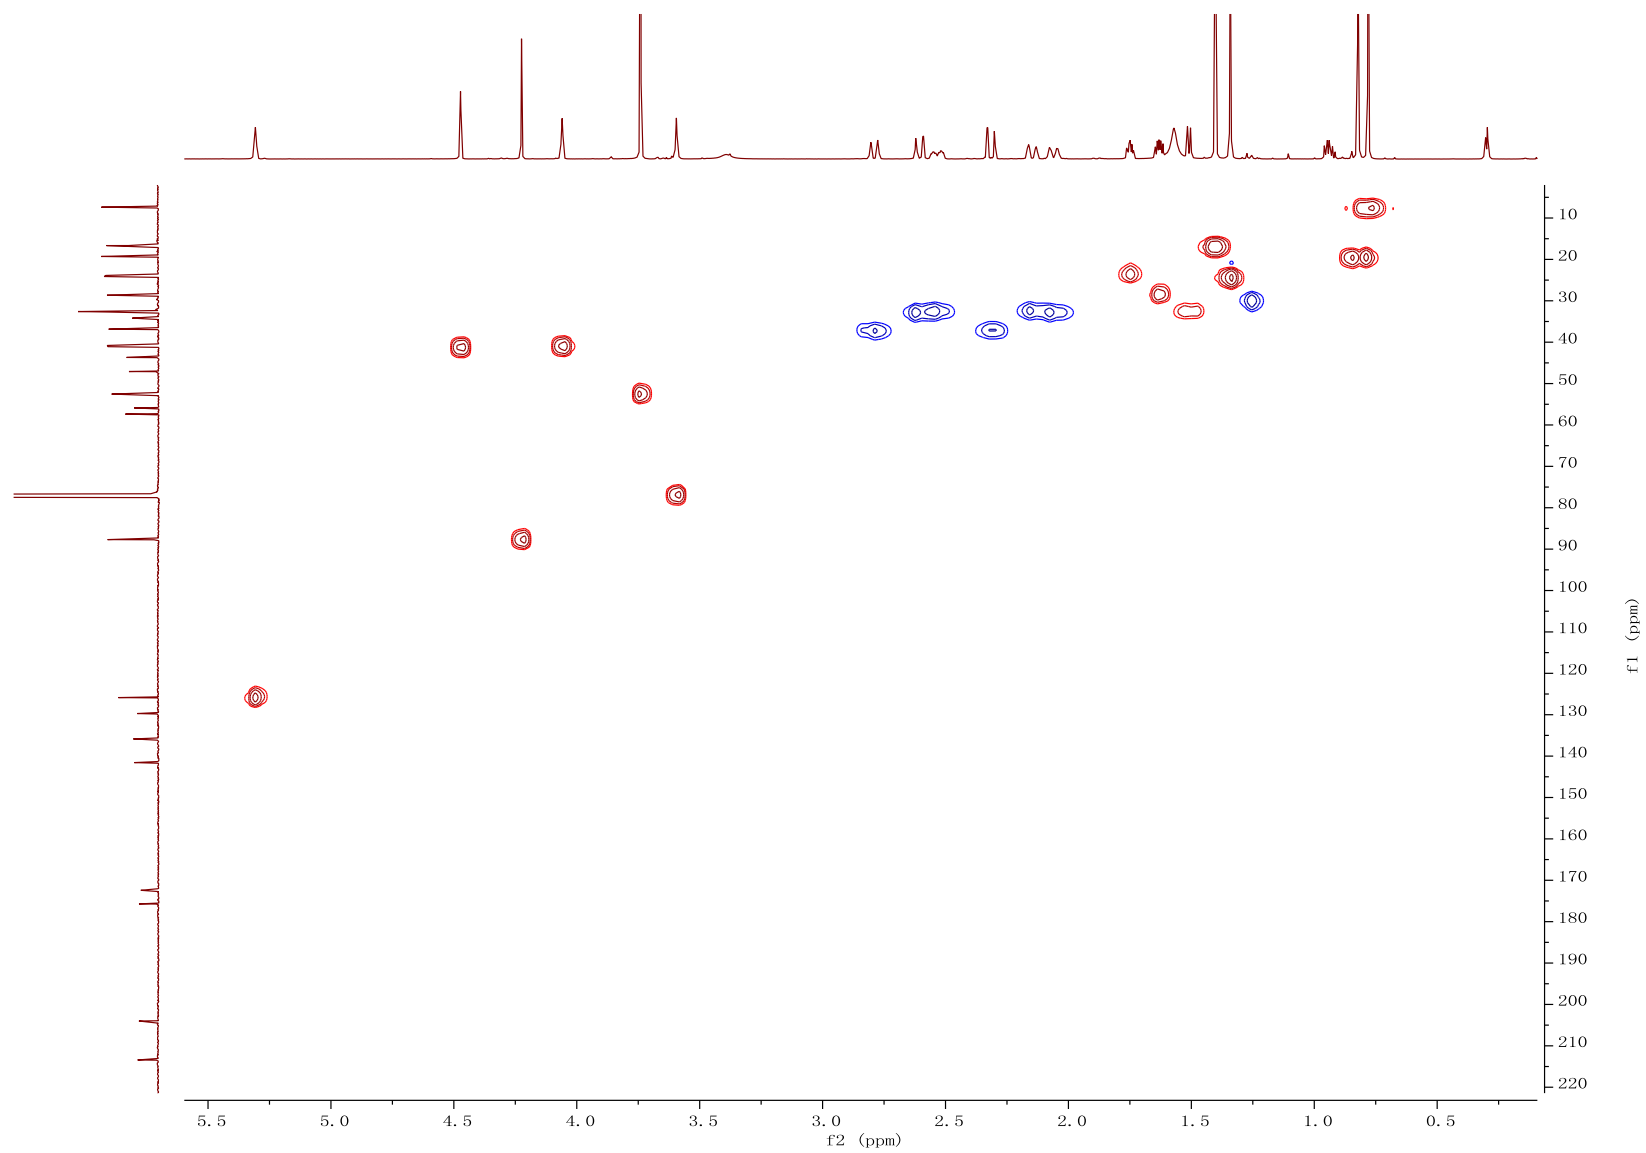

Figure S41. HMBC spectrum of chlorahupetone E (5) in CDCl<sub>3</sub>

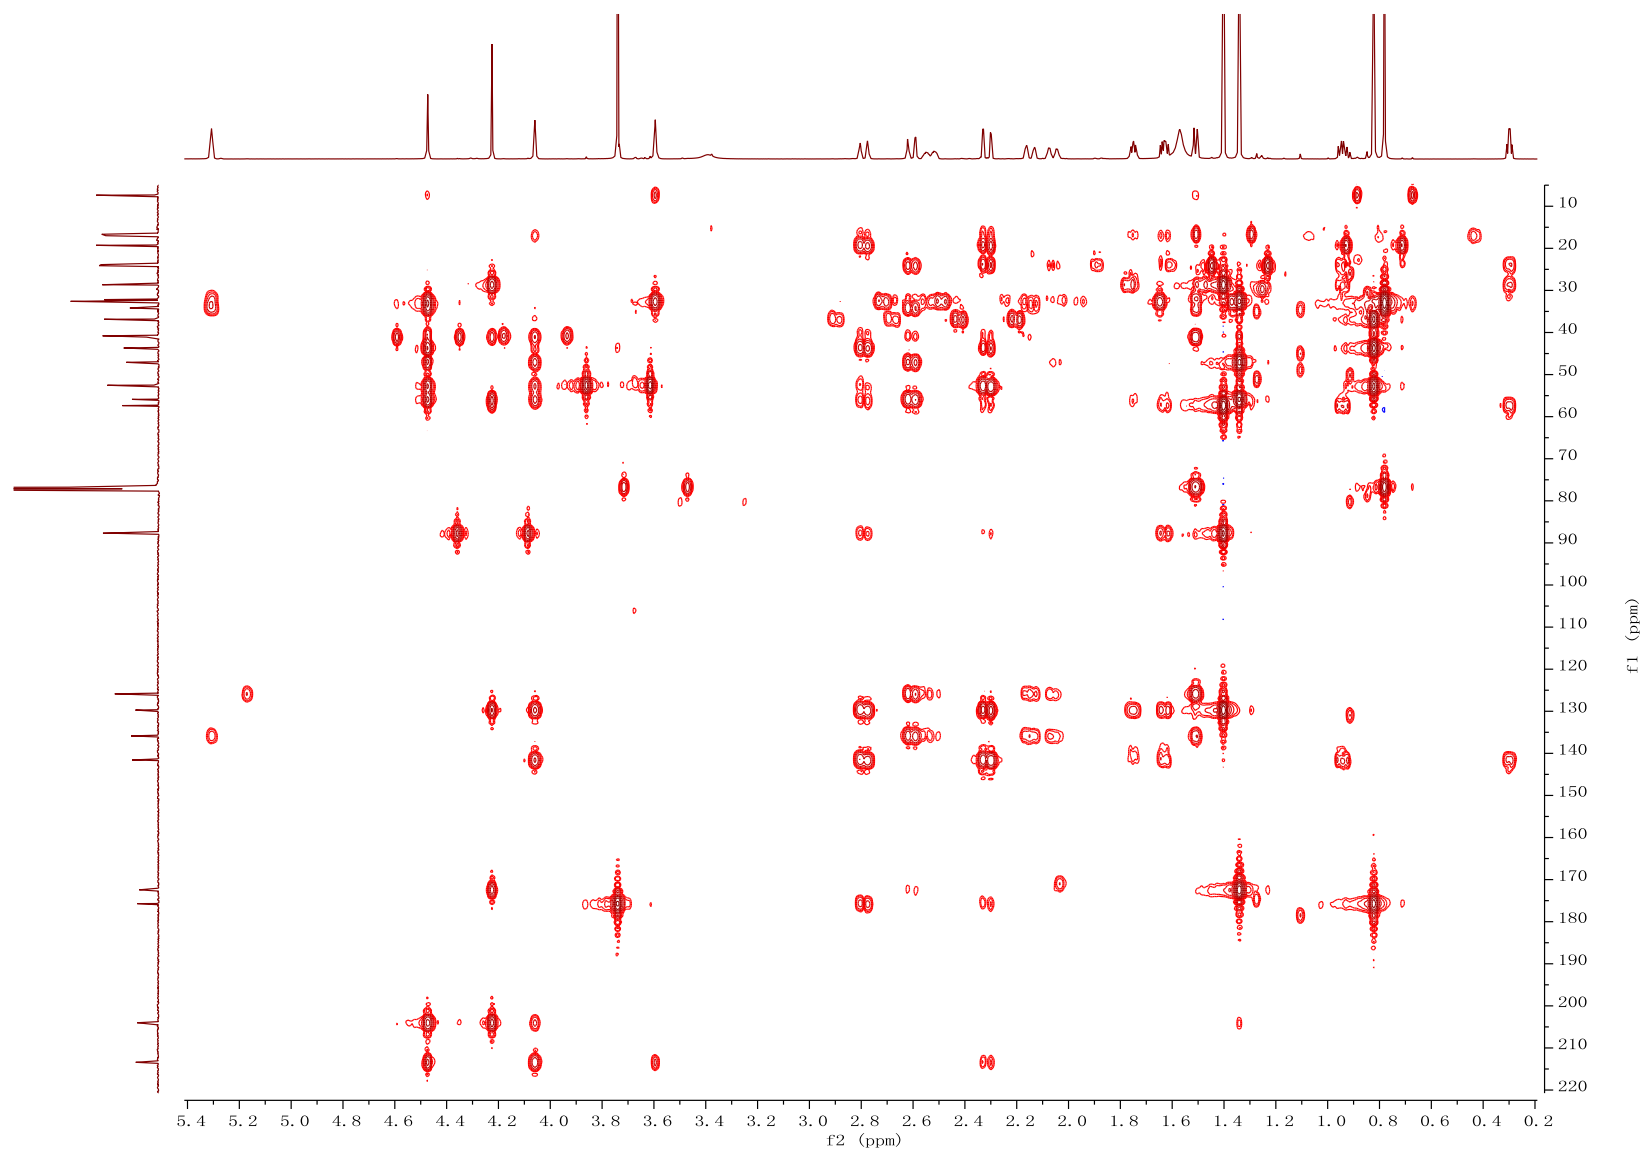

**Figure S42.**  $^1\text{H}$ - $^1\text{H}$  COSY spectrum of chlorahupetone E (**5**) in  $\text{CDCl}_3$

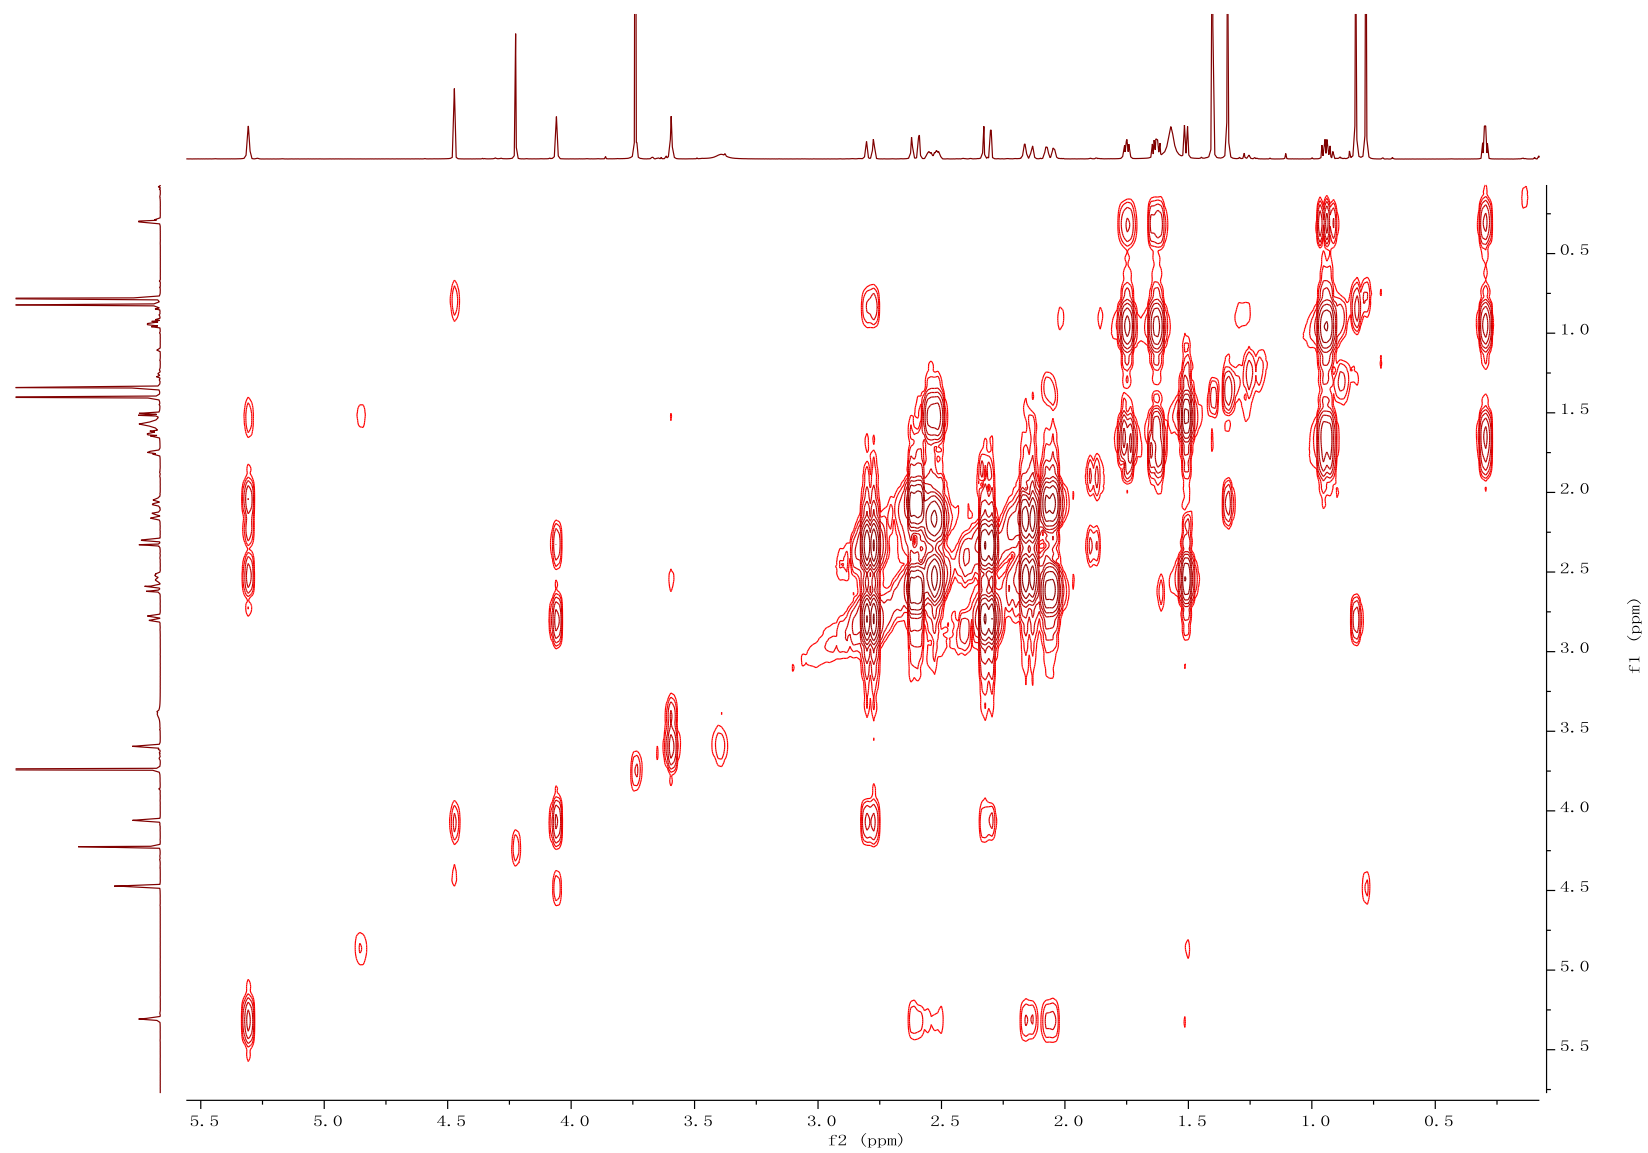

**Figure S43.** NOESY spectrum of chlorahupetone E (**5**) in  $\text{CDCl}_3$

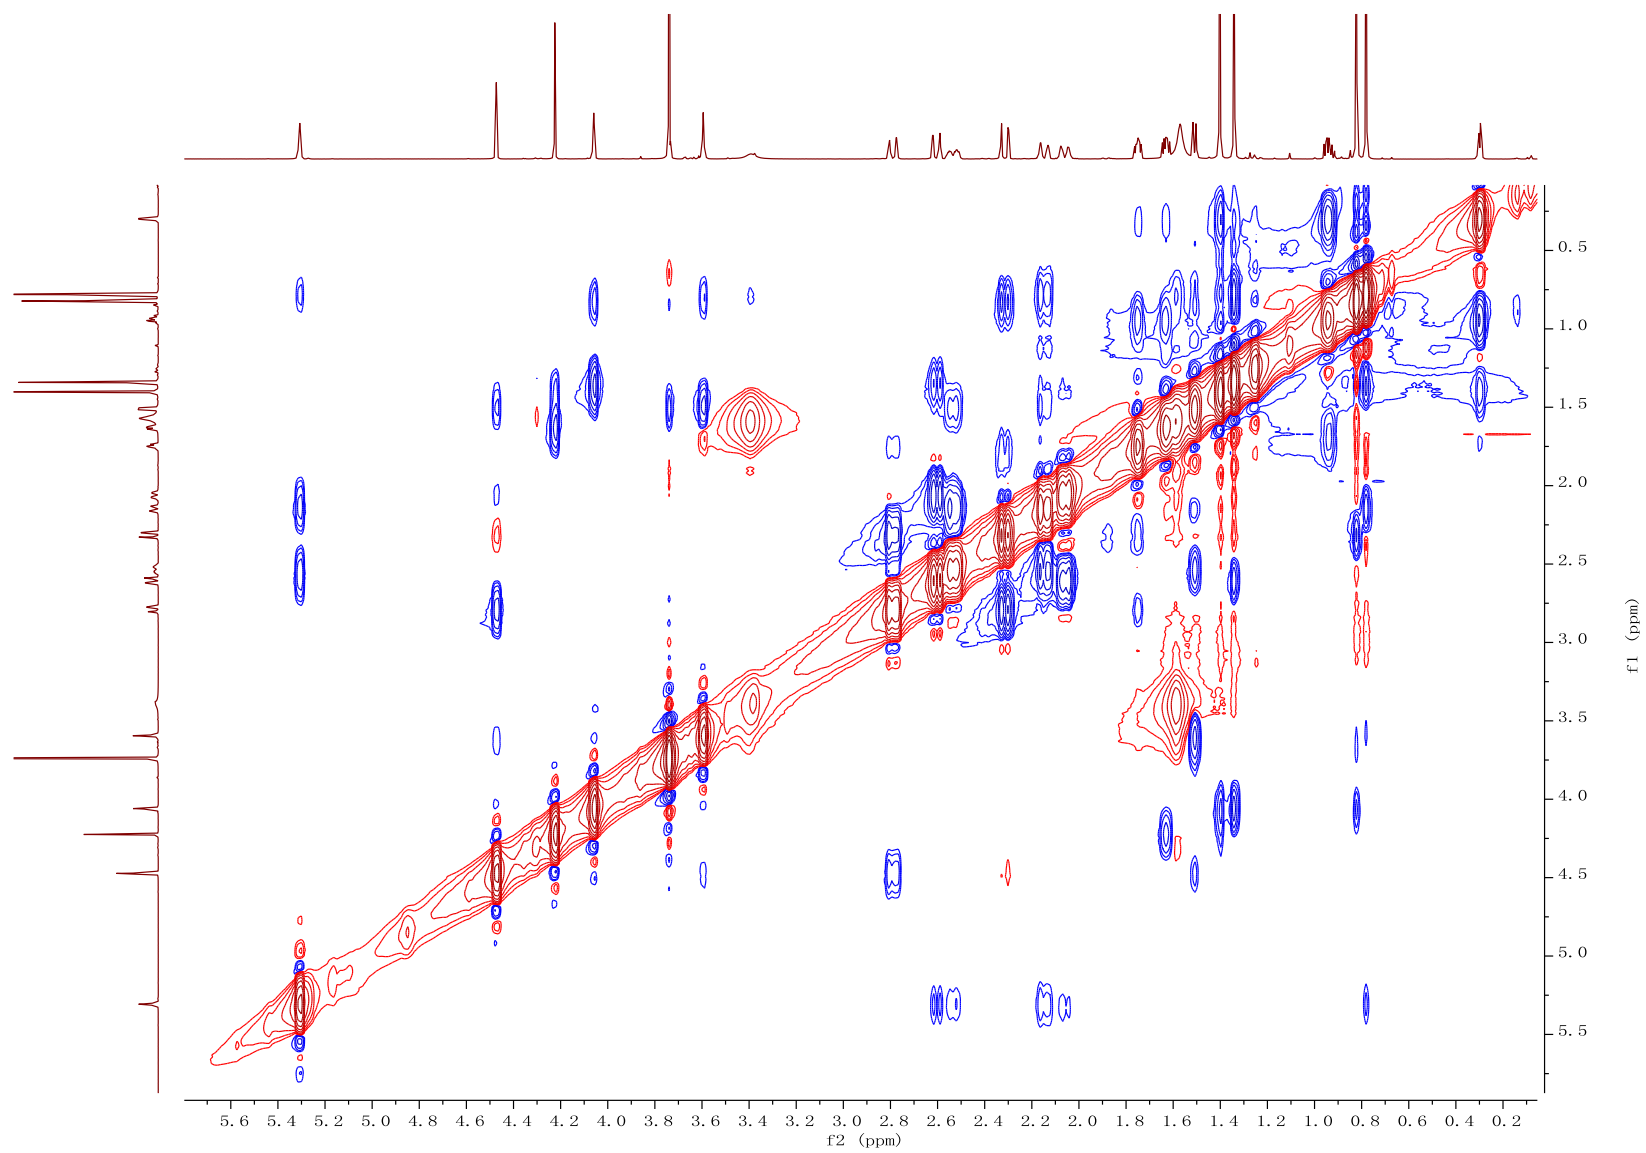



Figure S44. (+)-HRESIMS spectrum of chlorahupetone E (5)

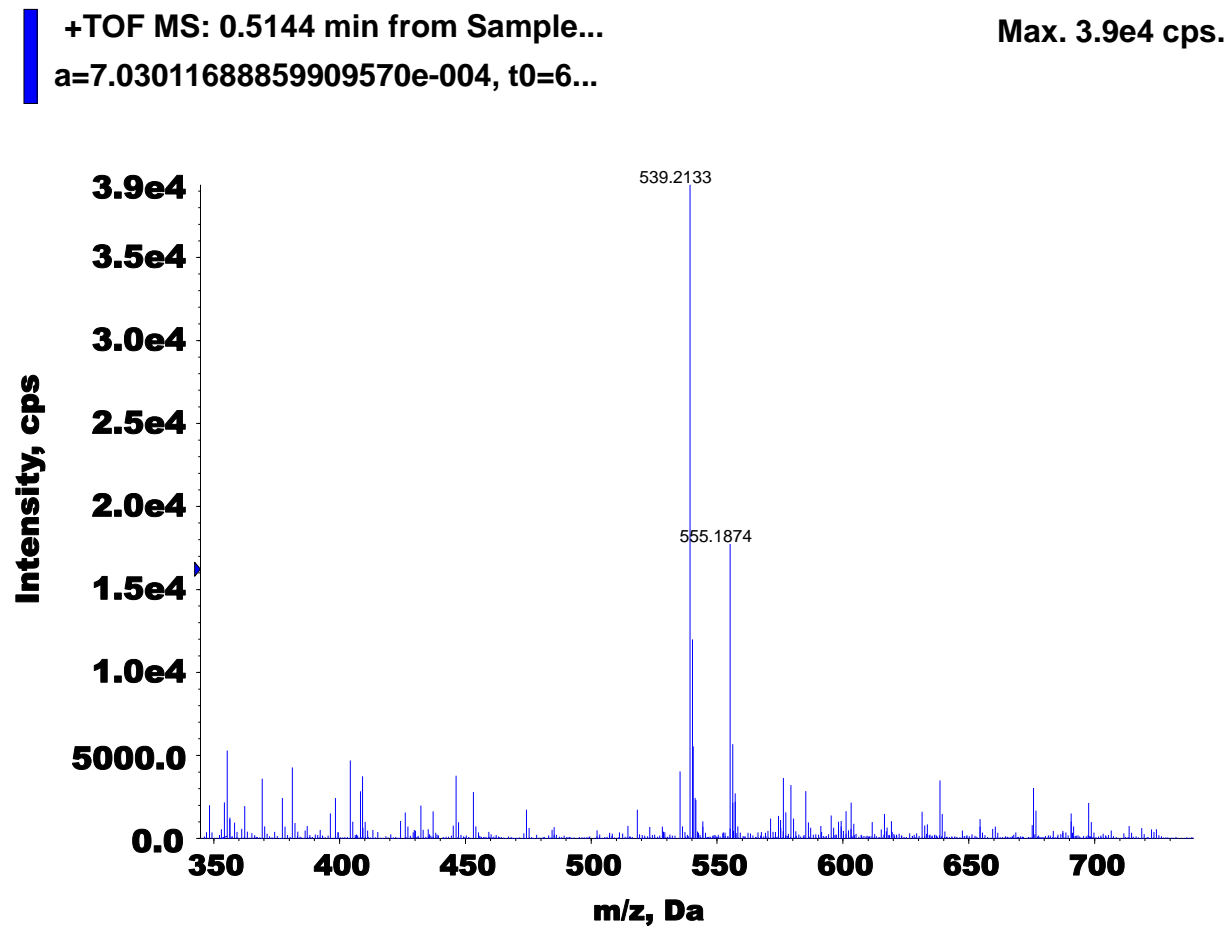

Figure S45. IR spectrum of chlorahupetone E (5)

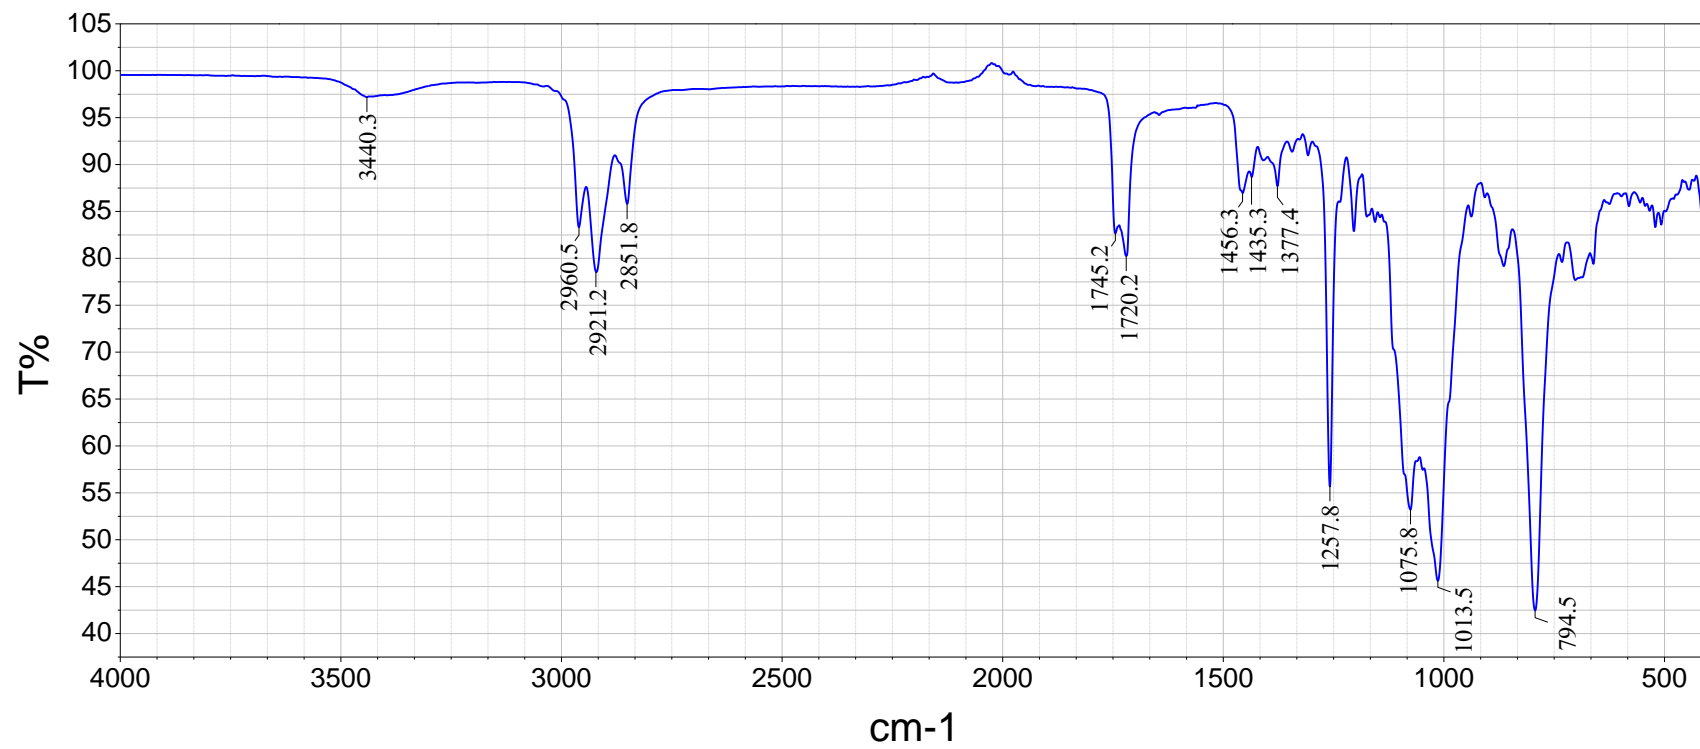

Figure S46. <sup>1</sup>H NMR spectrum of chlorahupetone F (6) in CDCl<sub>3</sub>

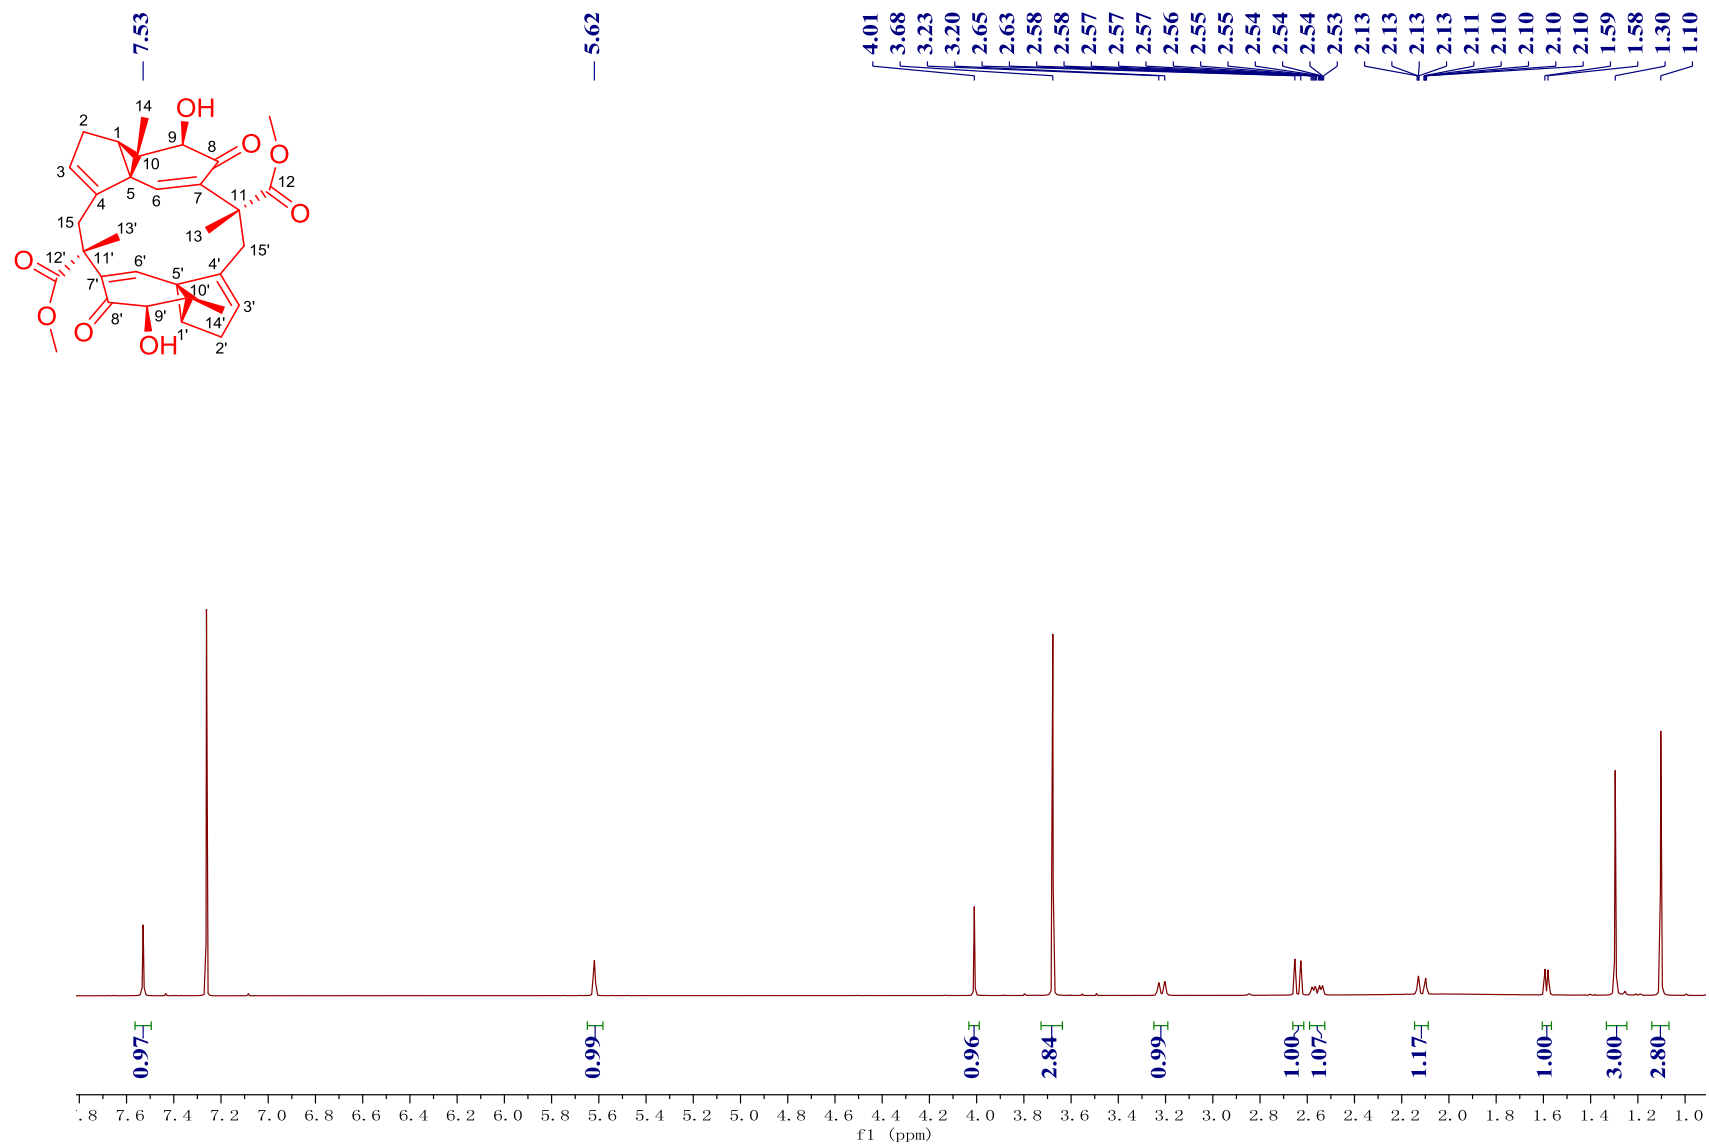

Figure S47.  $^{13}\text{C}$  NMR and DEPT spectrum of chlorahupetone F (6) in  $\text{CDCl}_3$

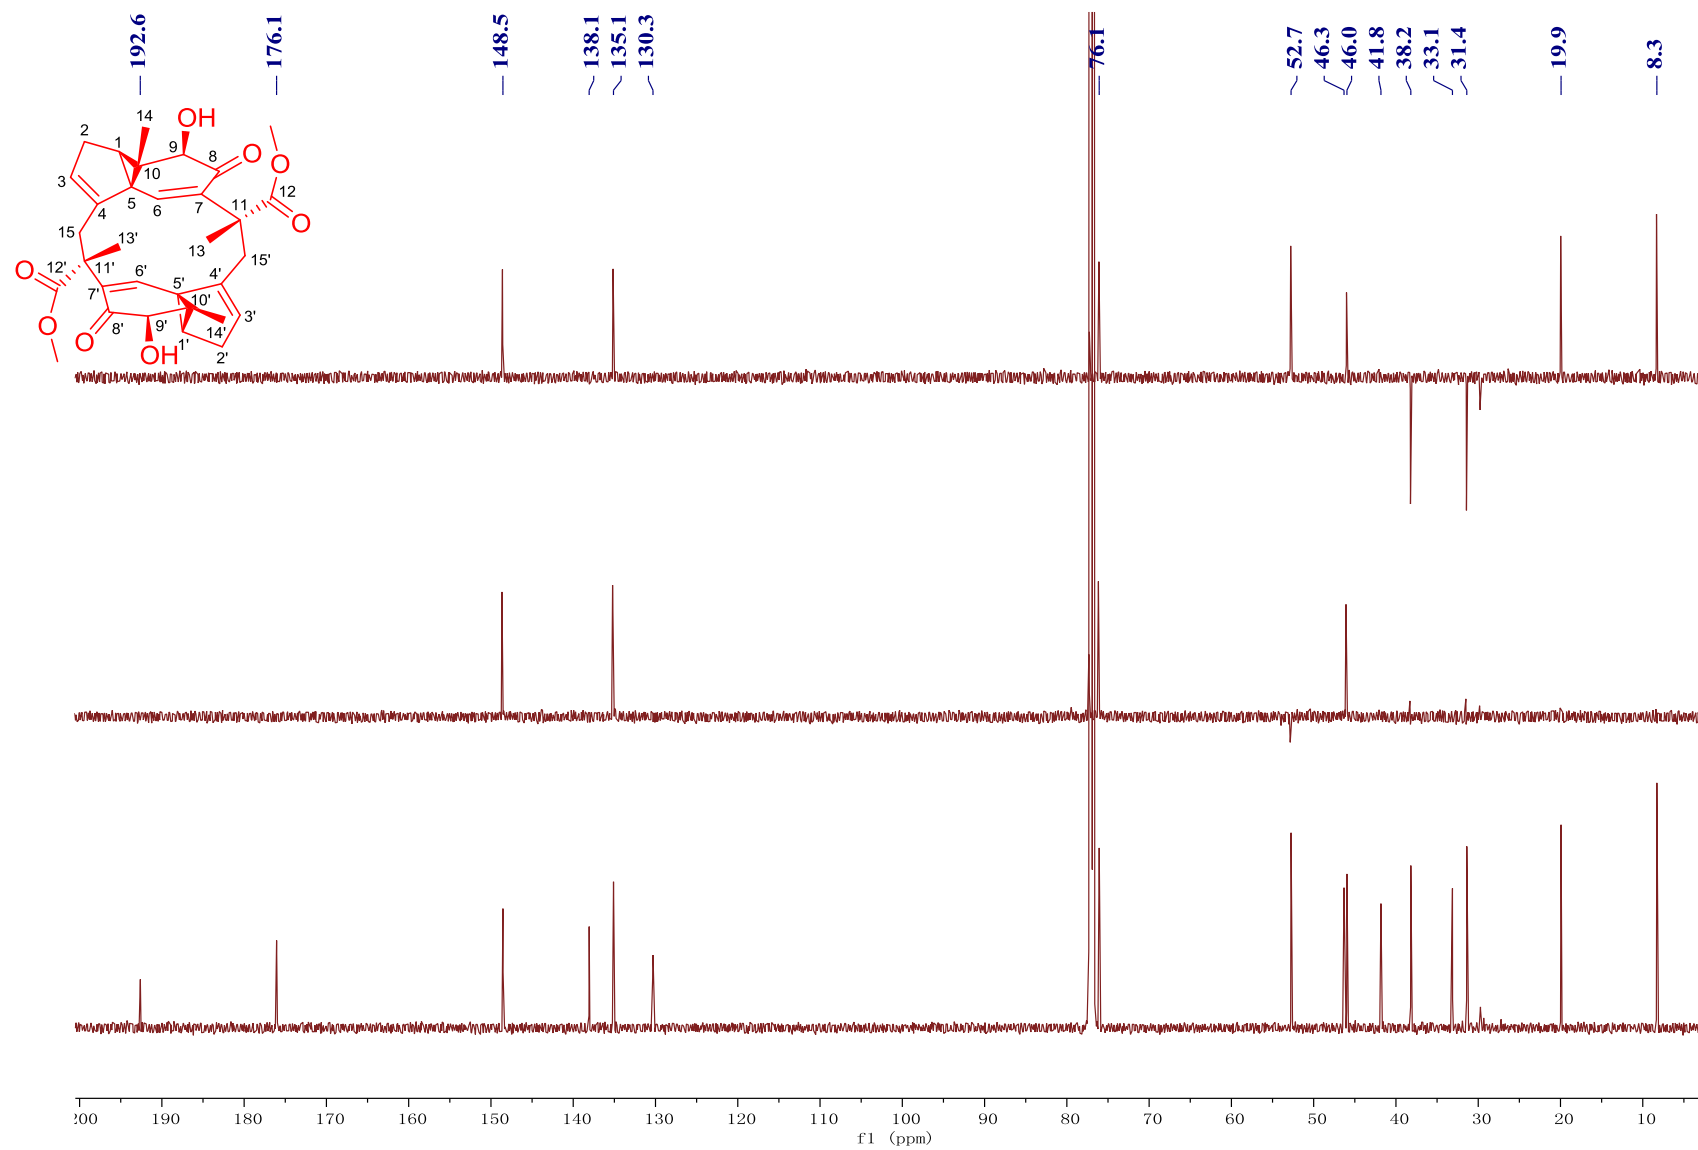

**Figure S48.** HSQC spectrum of chlorahupetone F (**6**) in CDCl<sub>3</sub>

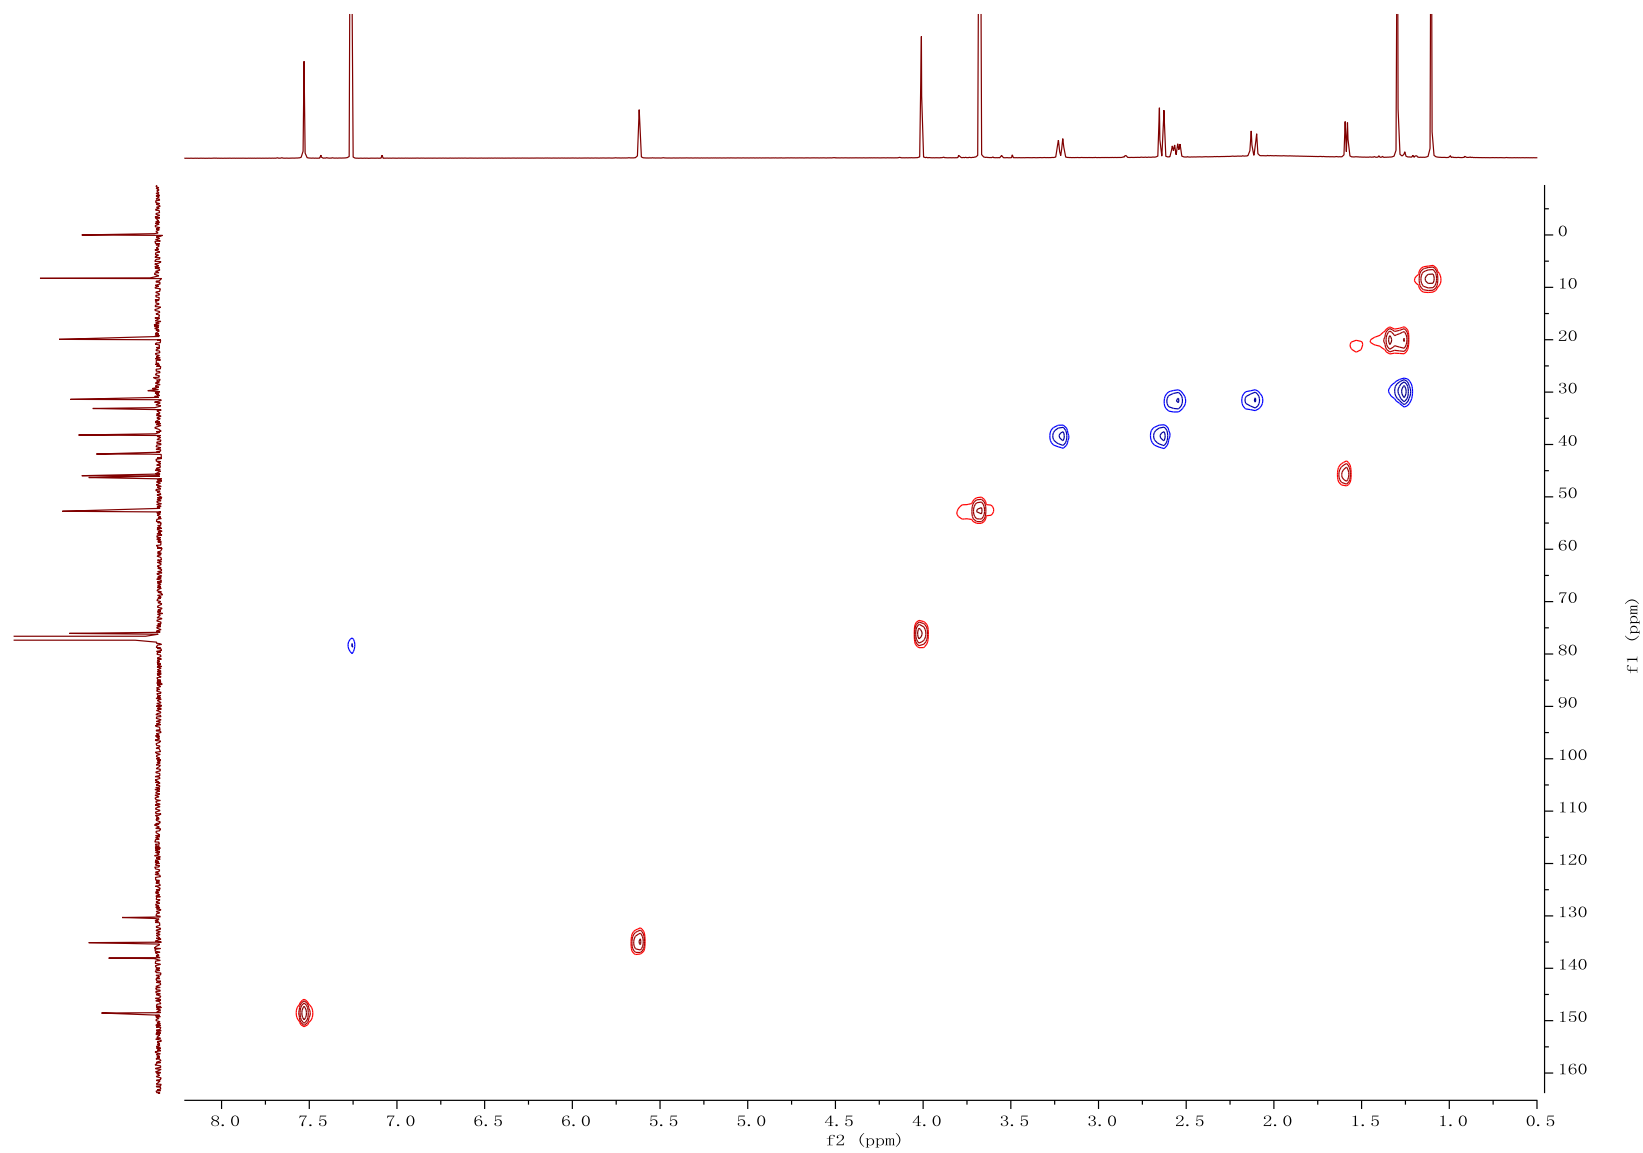

**Figure S49.** HMBC spectrum of chlorahupetone F (**6**) in CDCl<sub>3</sub>

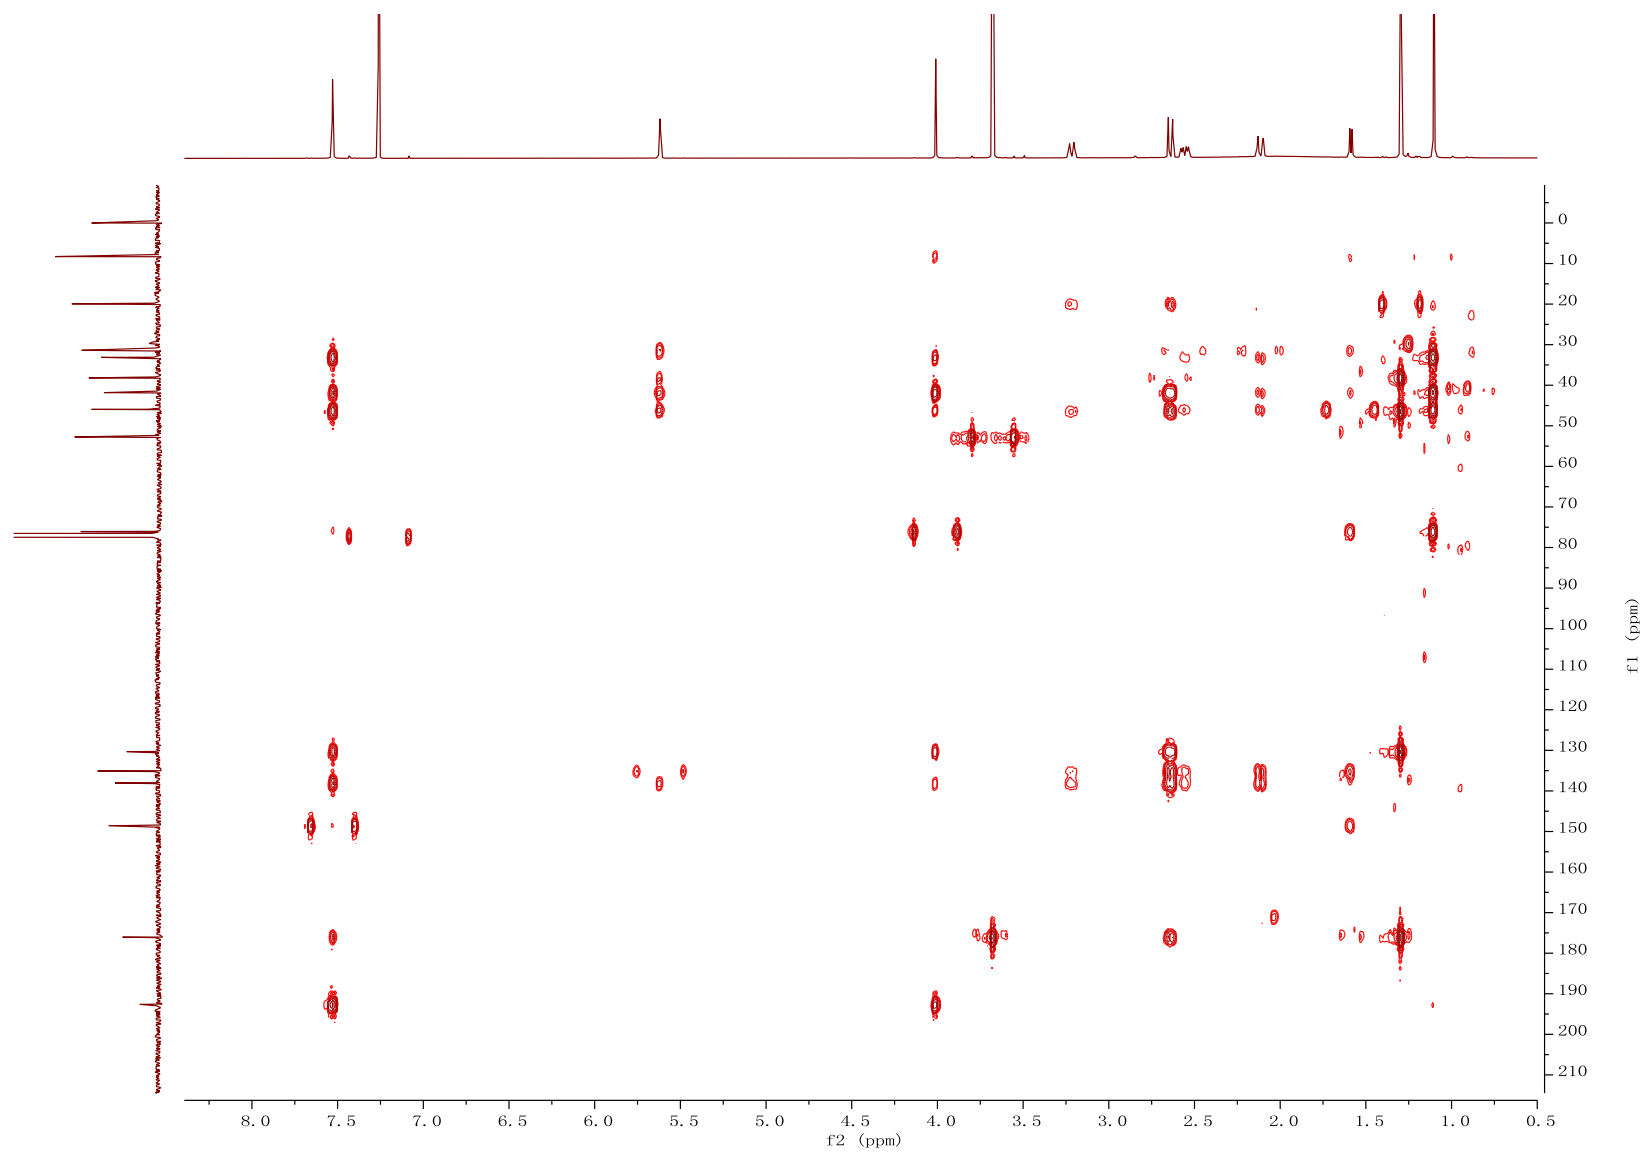

**Figure S50.**  $^1\text{H}$ - $^1\text{H}$  COSY spectrum of chlorahupetone F (**6**) in  $\text{CDCl}_3$

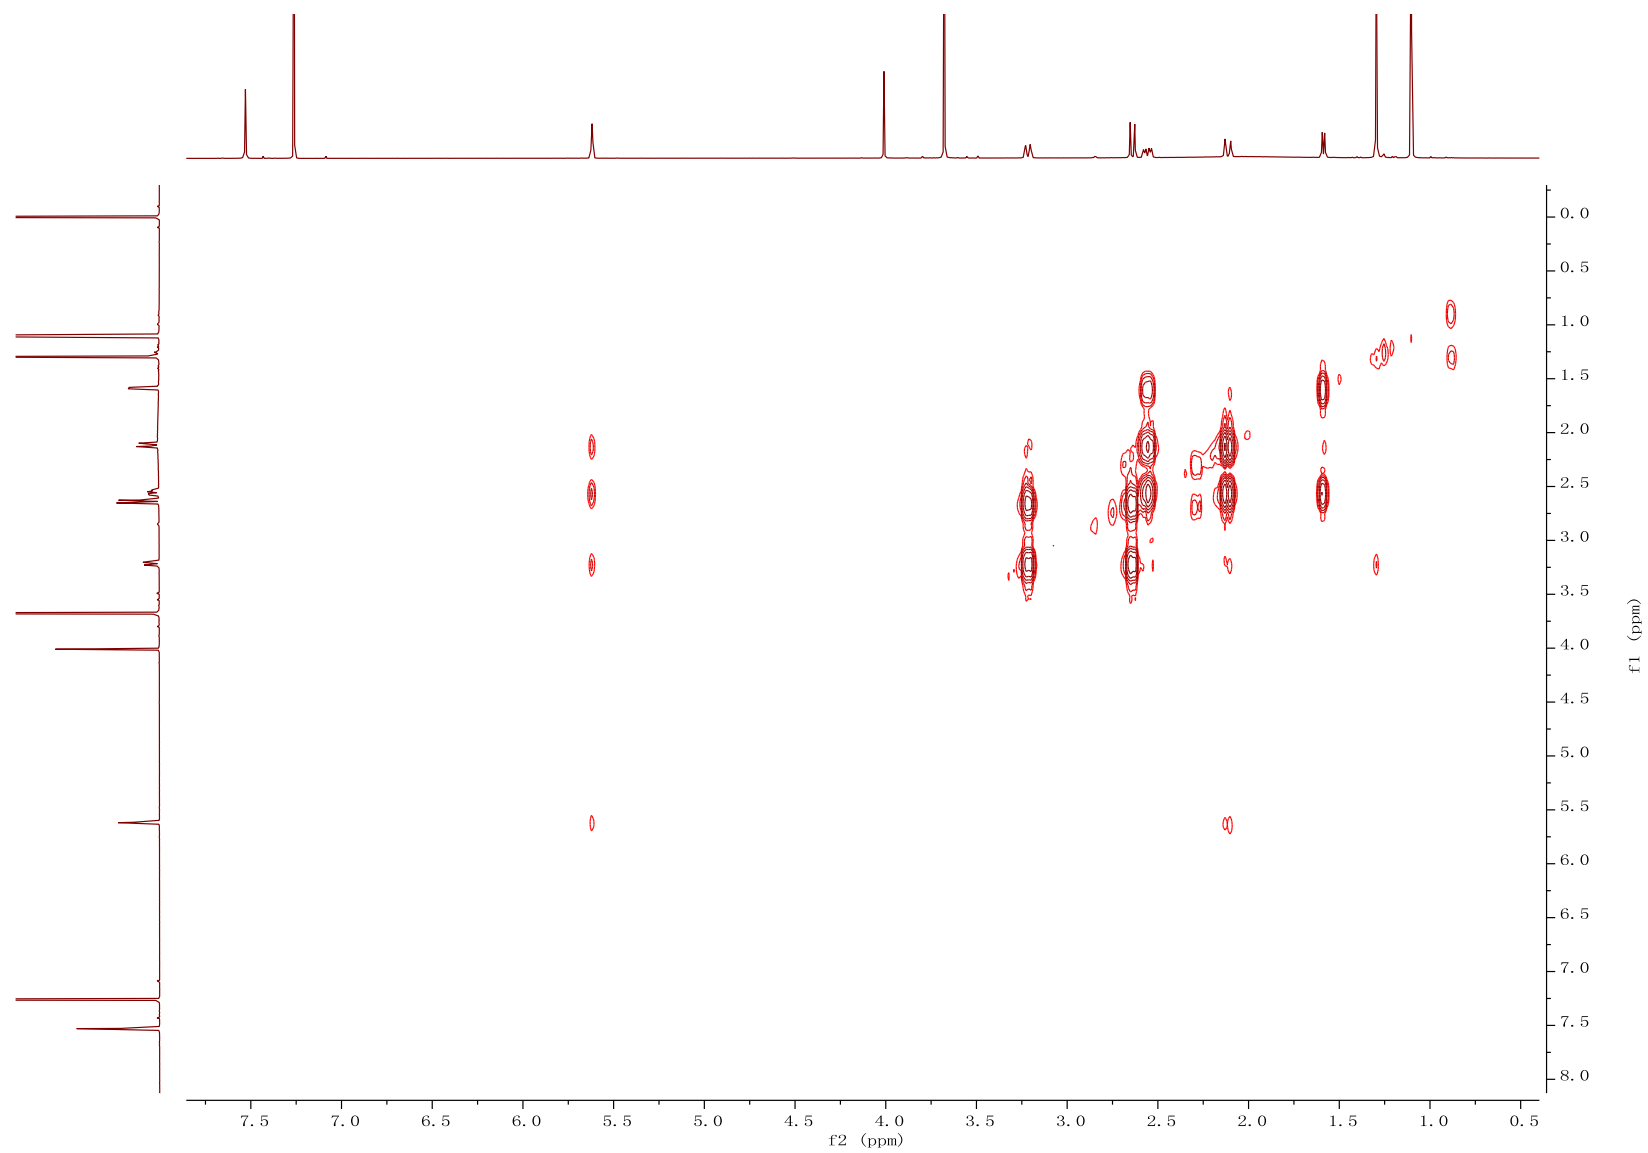

**Figure S51.** NOESY spectrum of chlorahupetone F (**6**) in CDCl<sub>3</sub>

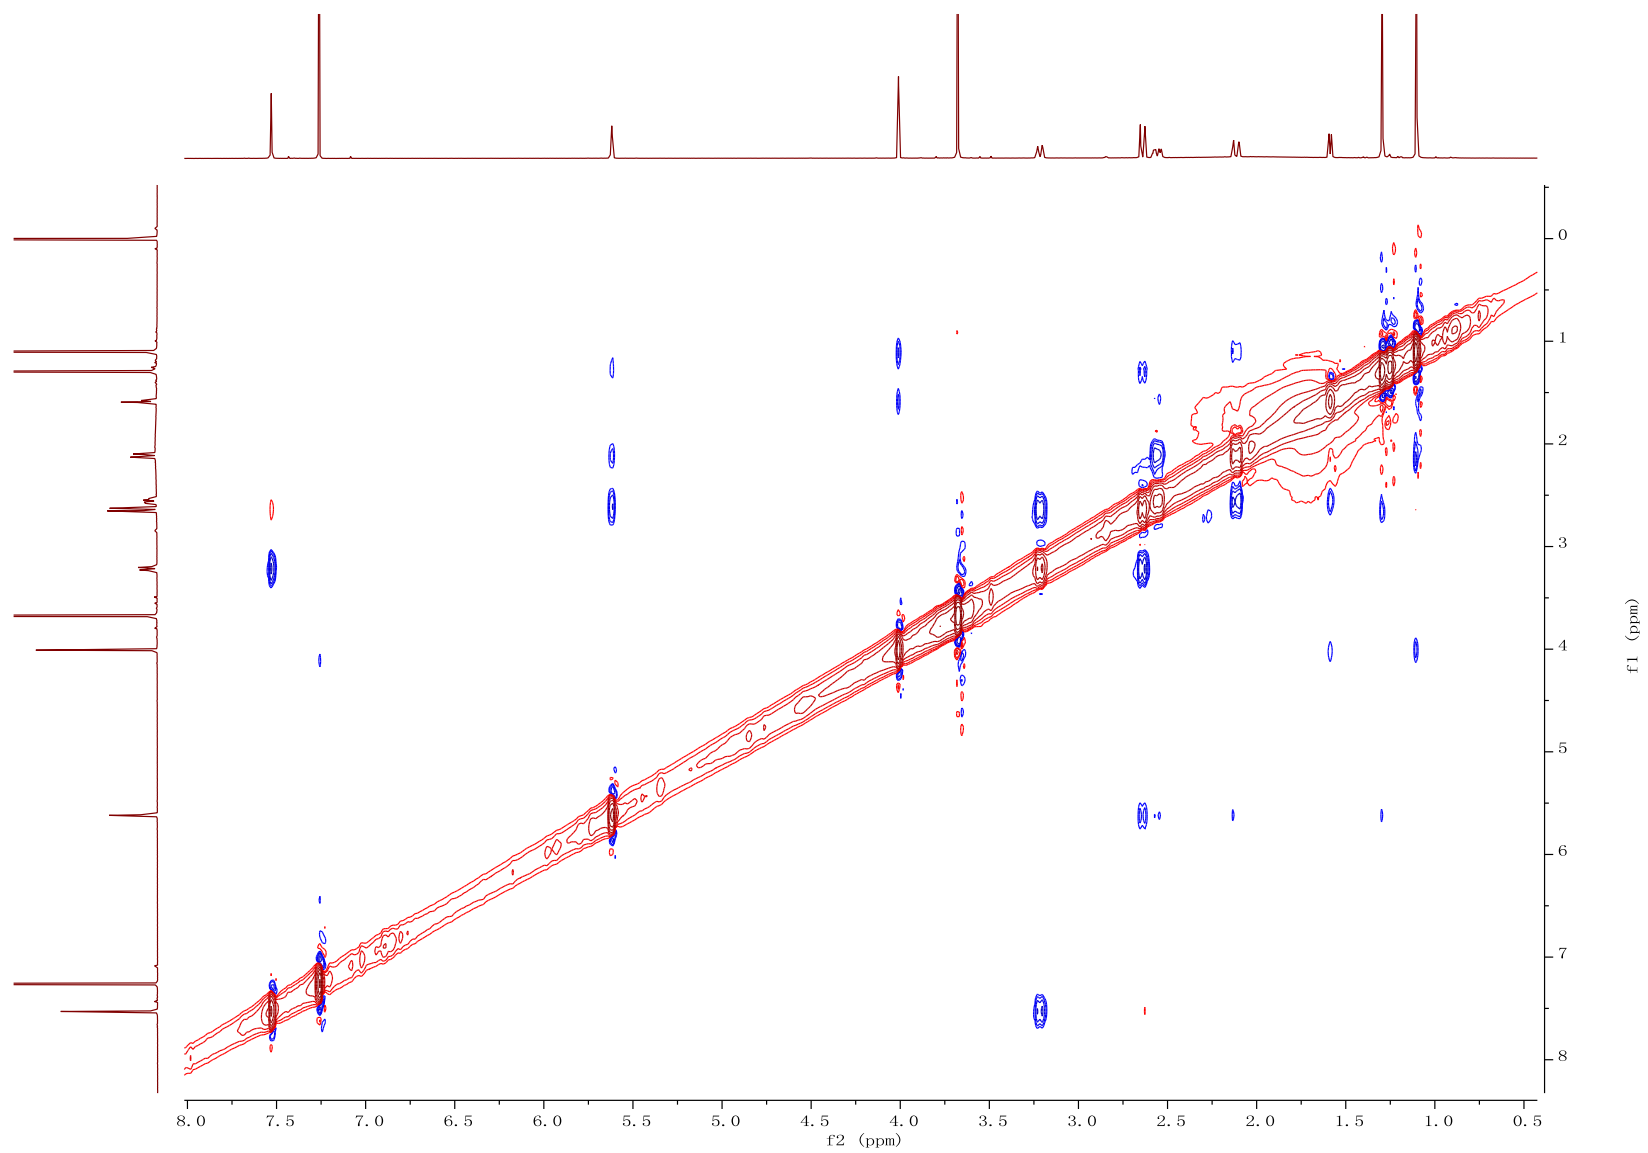



Figure S52. (+)-HRESIMS spectrum of chlorahupetone F (6)

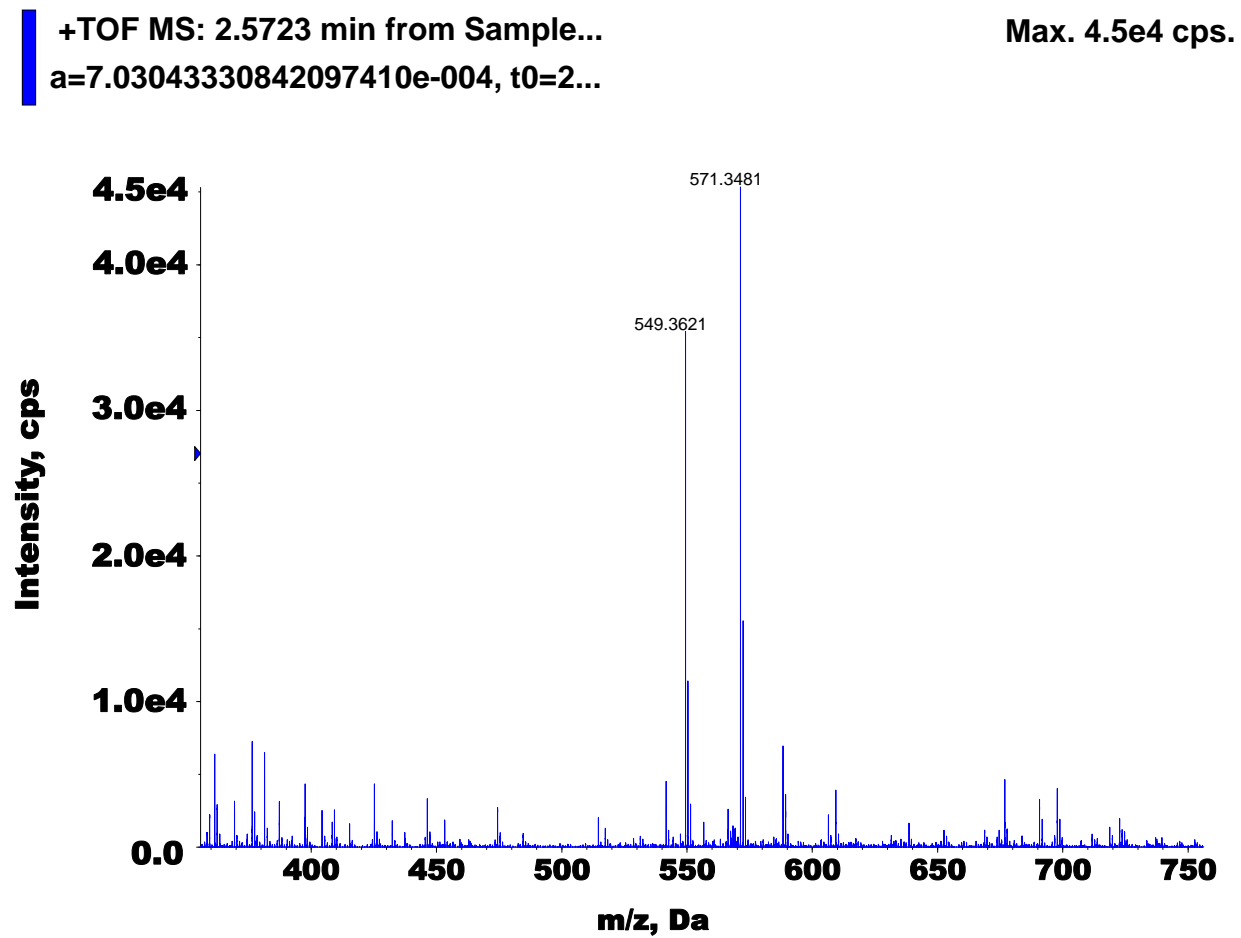

Figure S53. IR spectrum of chlorahupetone F (6)

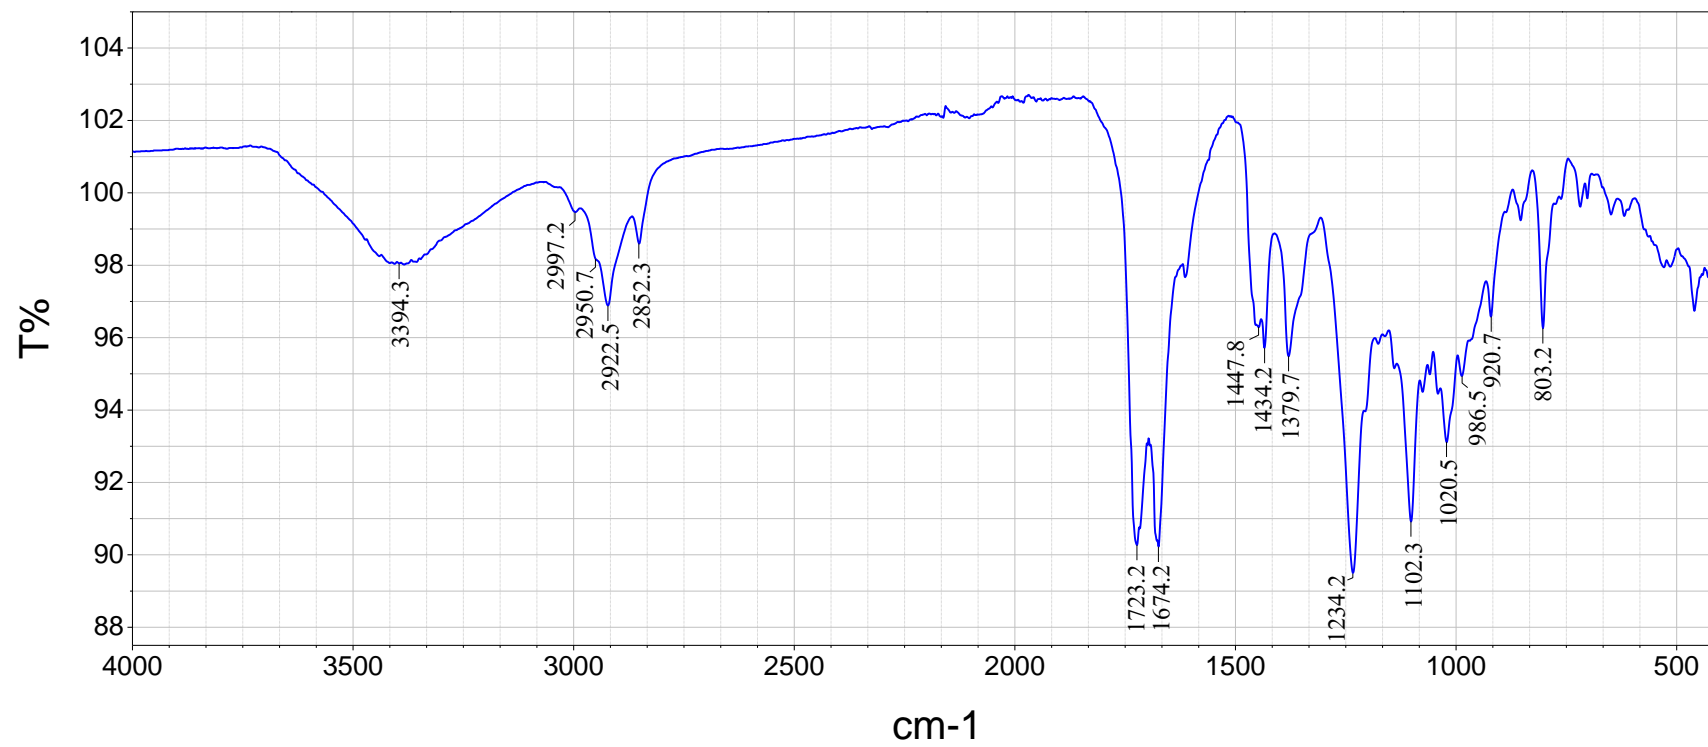

Figure S54. <sup>1</sup>H NMR spectrum of chlorahupetone G (7) in CDCl<sub>3</sub>

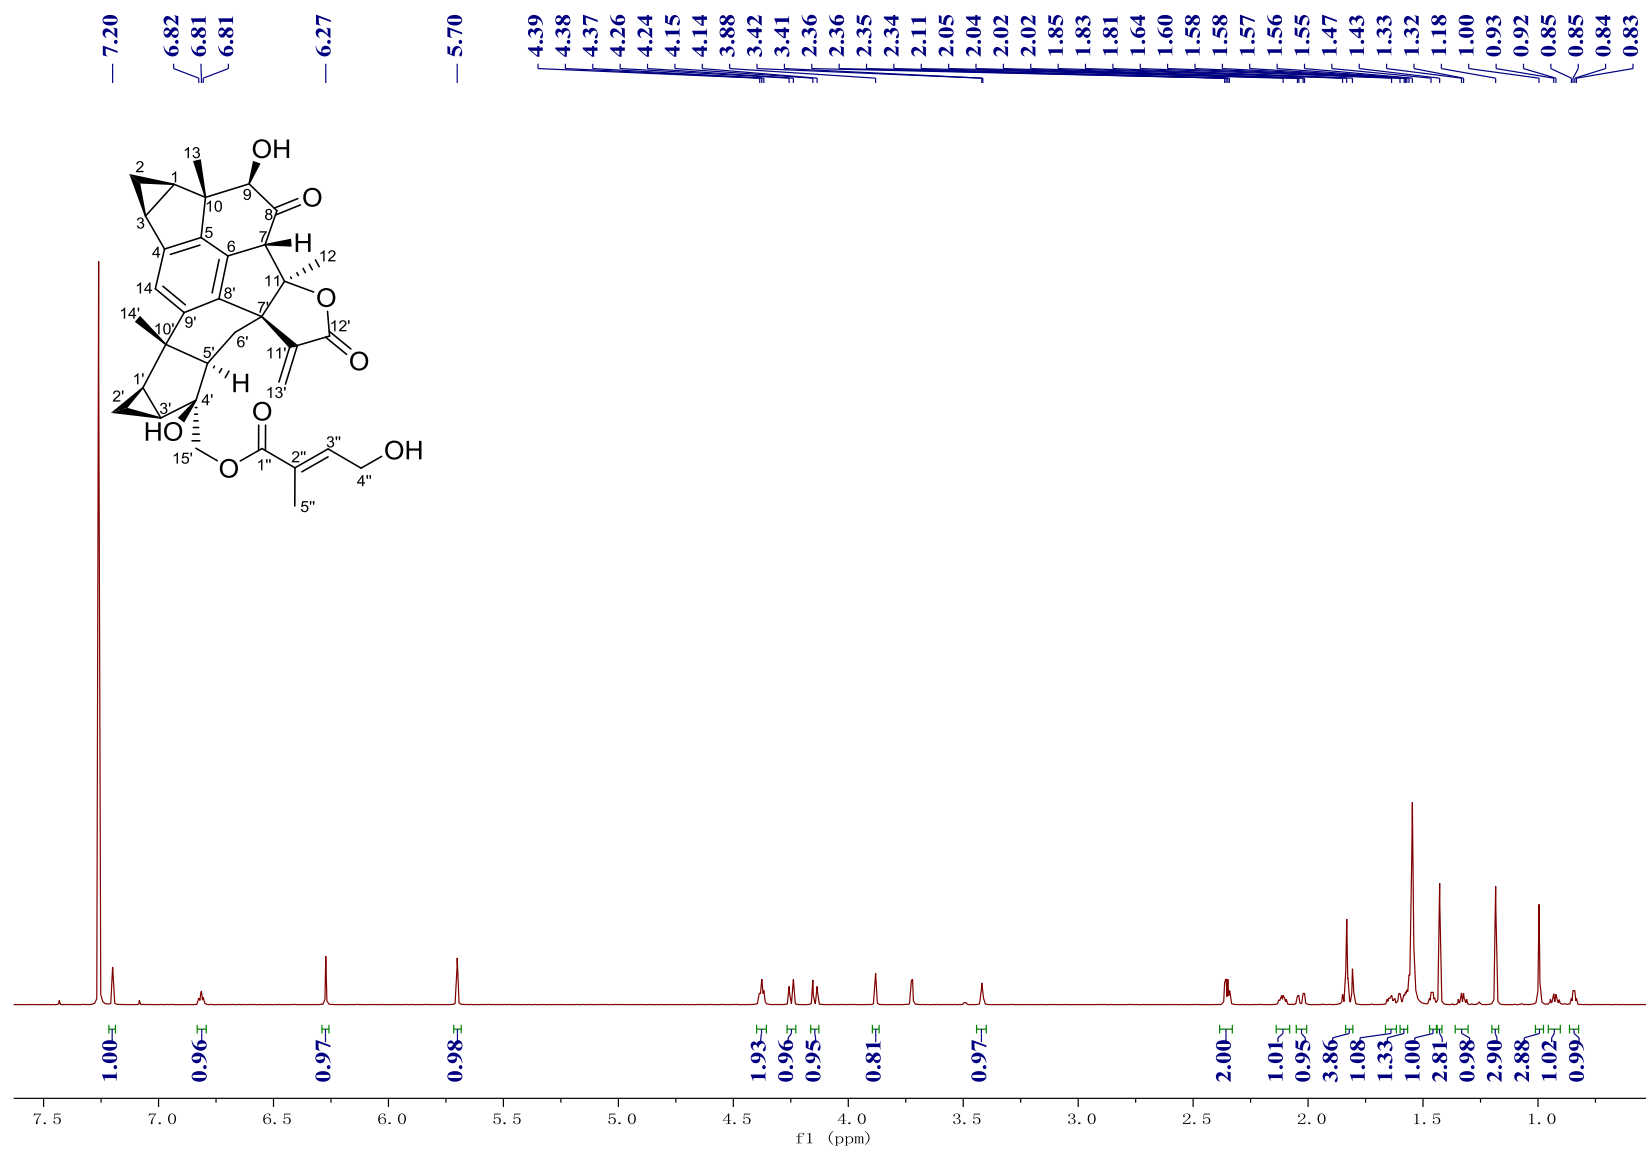

Figure S55.  $^{13}\text{C}$  NMR and DEPT spectrum of chlorahupetone G (7) in  $\text{CDCl}_3$

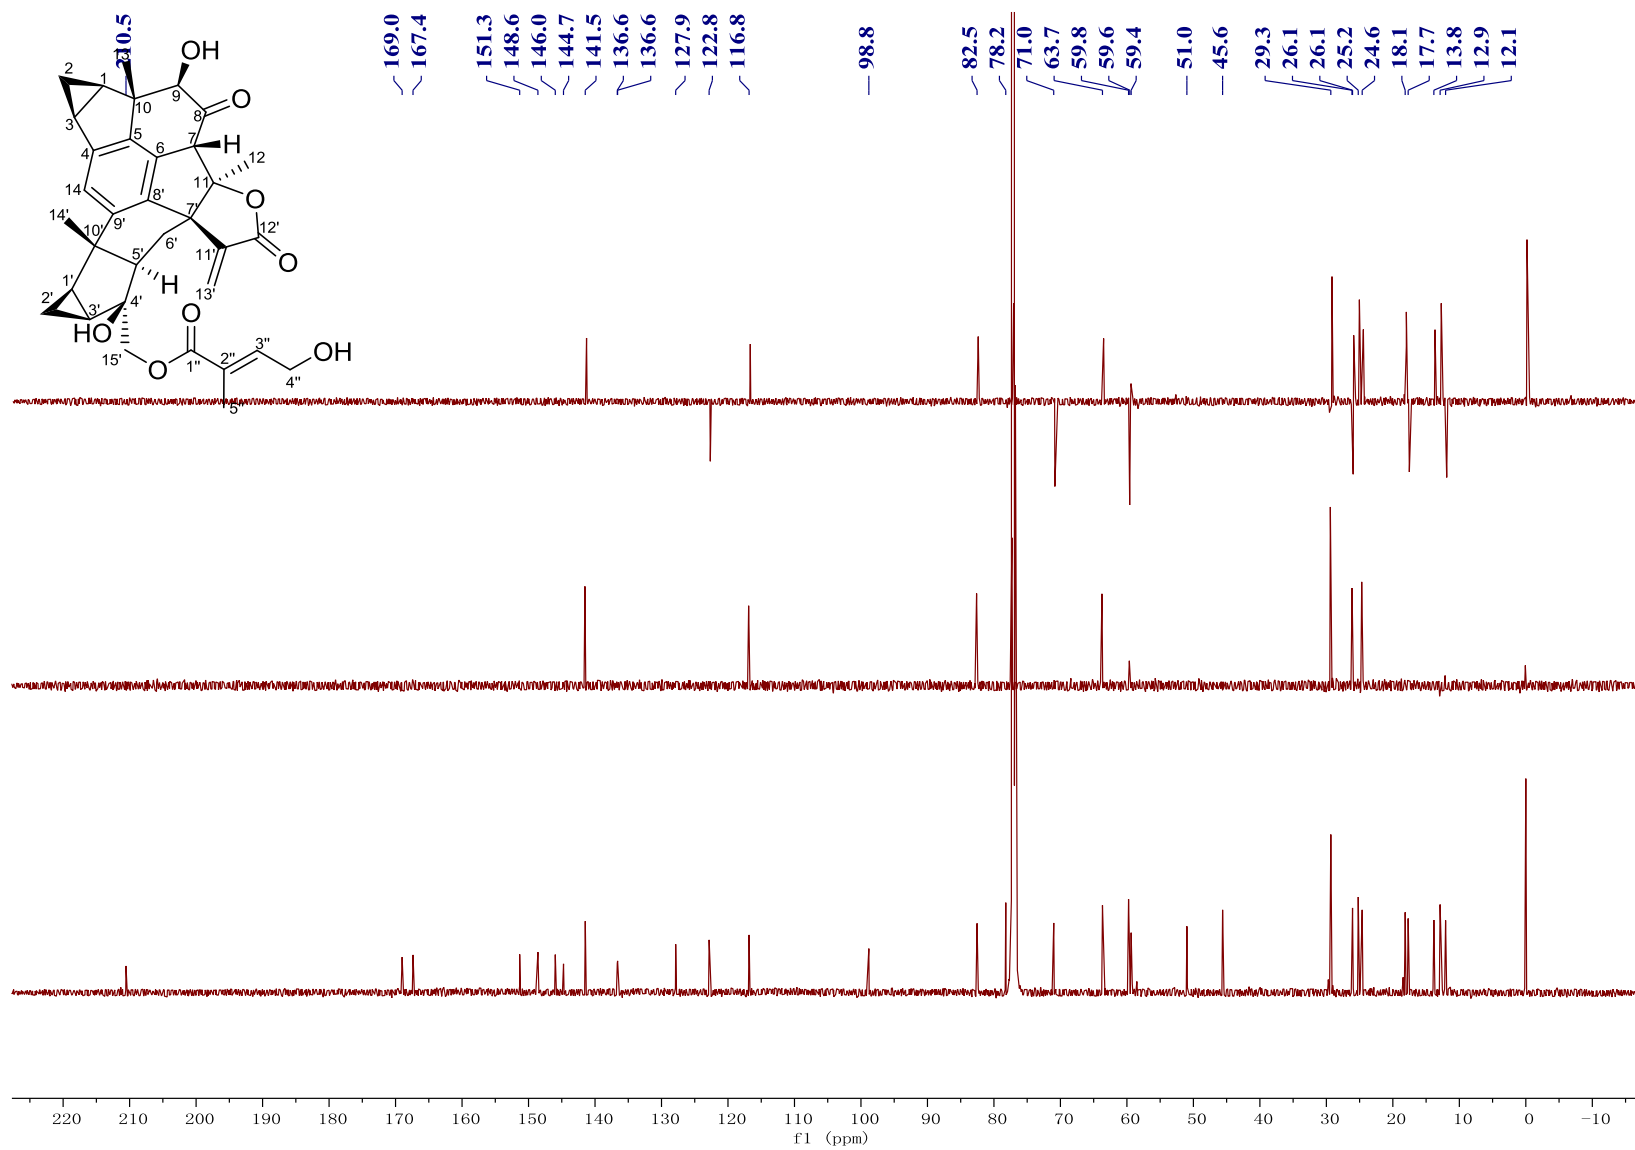

**Figure S56.** HSQC spectrum of chlorahupetone G (**7**) in CDCl<sub>3</sub>

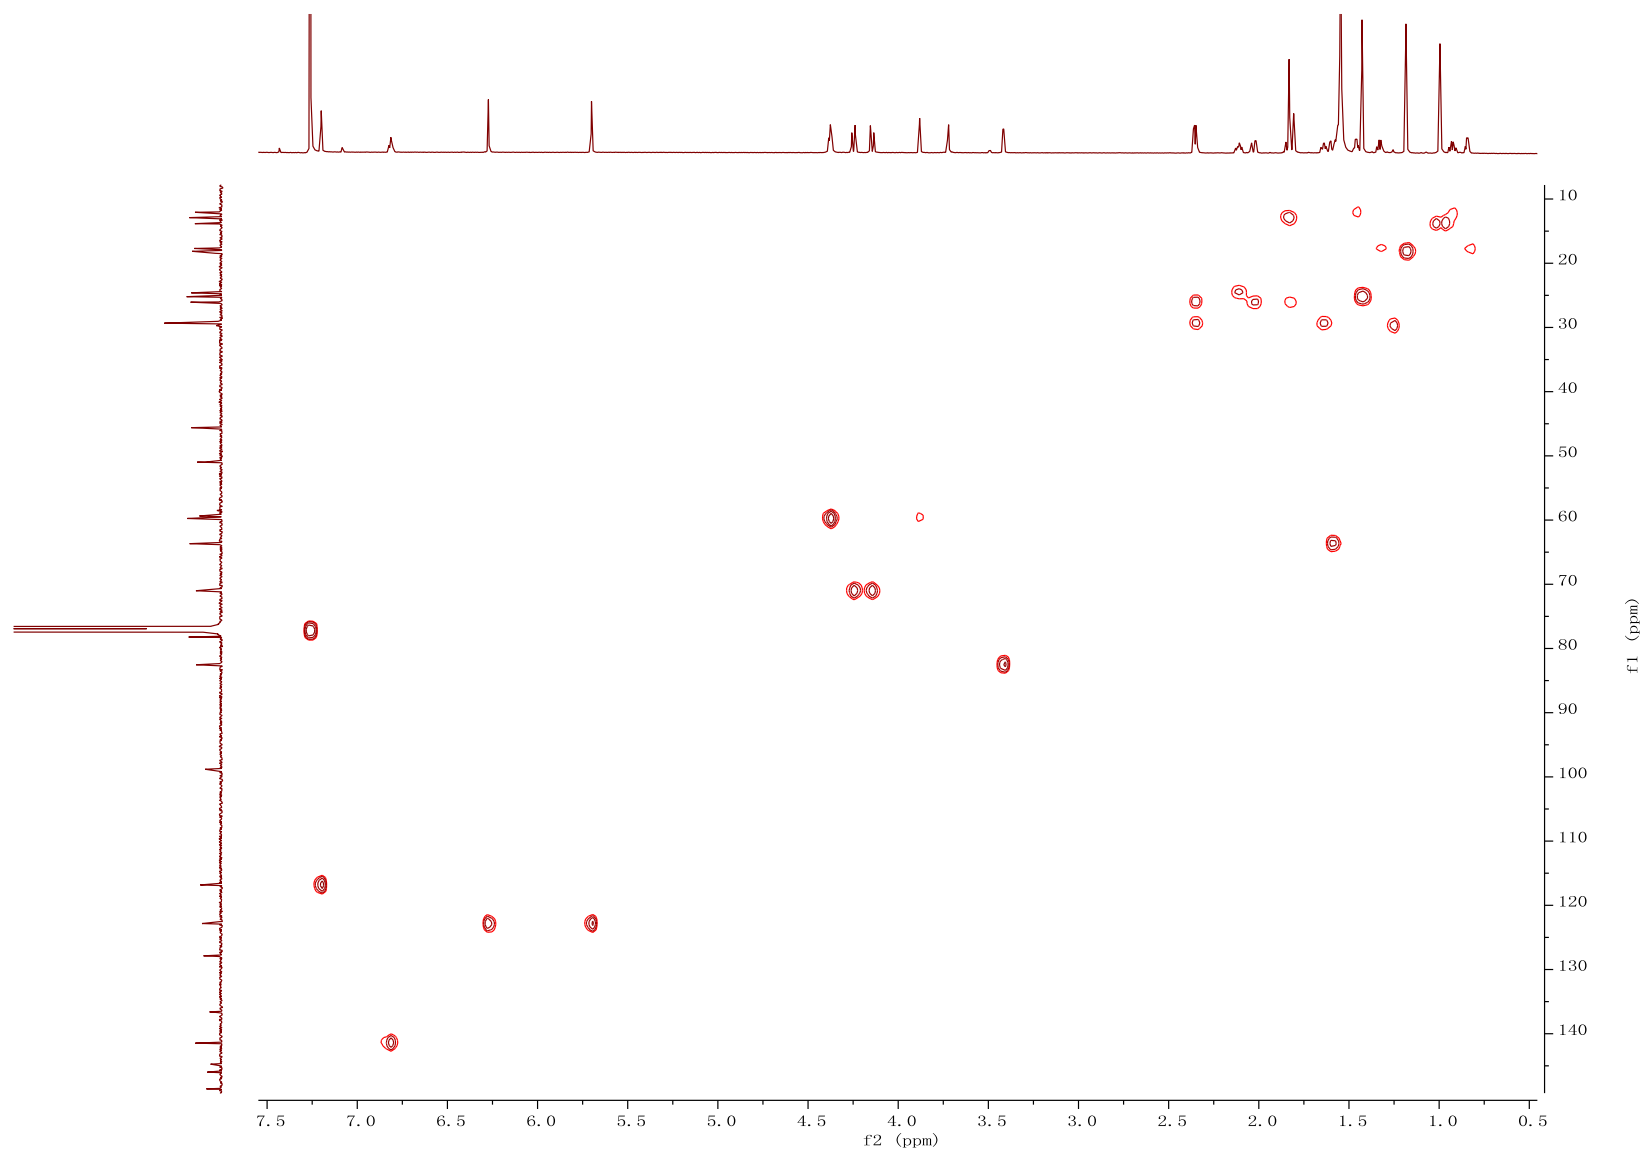

Figure S57. HMBC spectrum of chlorahupetone G (7) in CDCl<sub>3</sub>

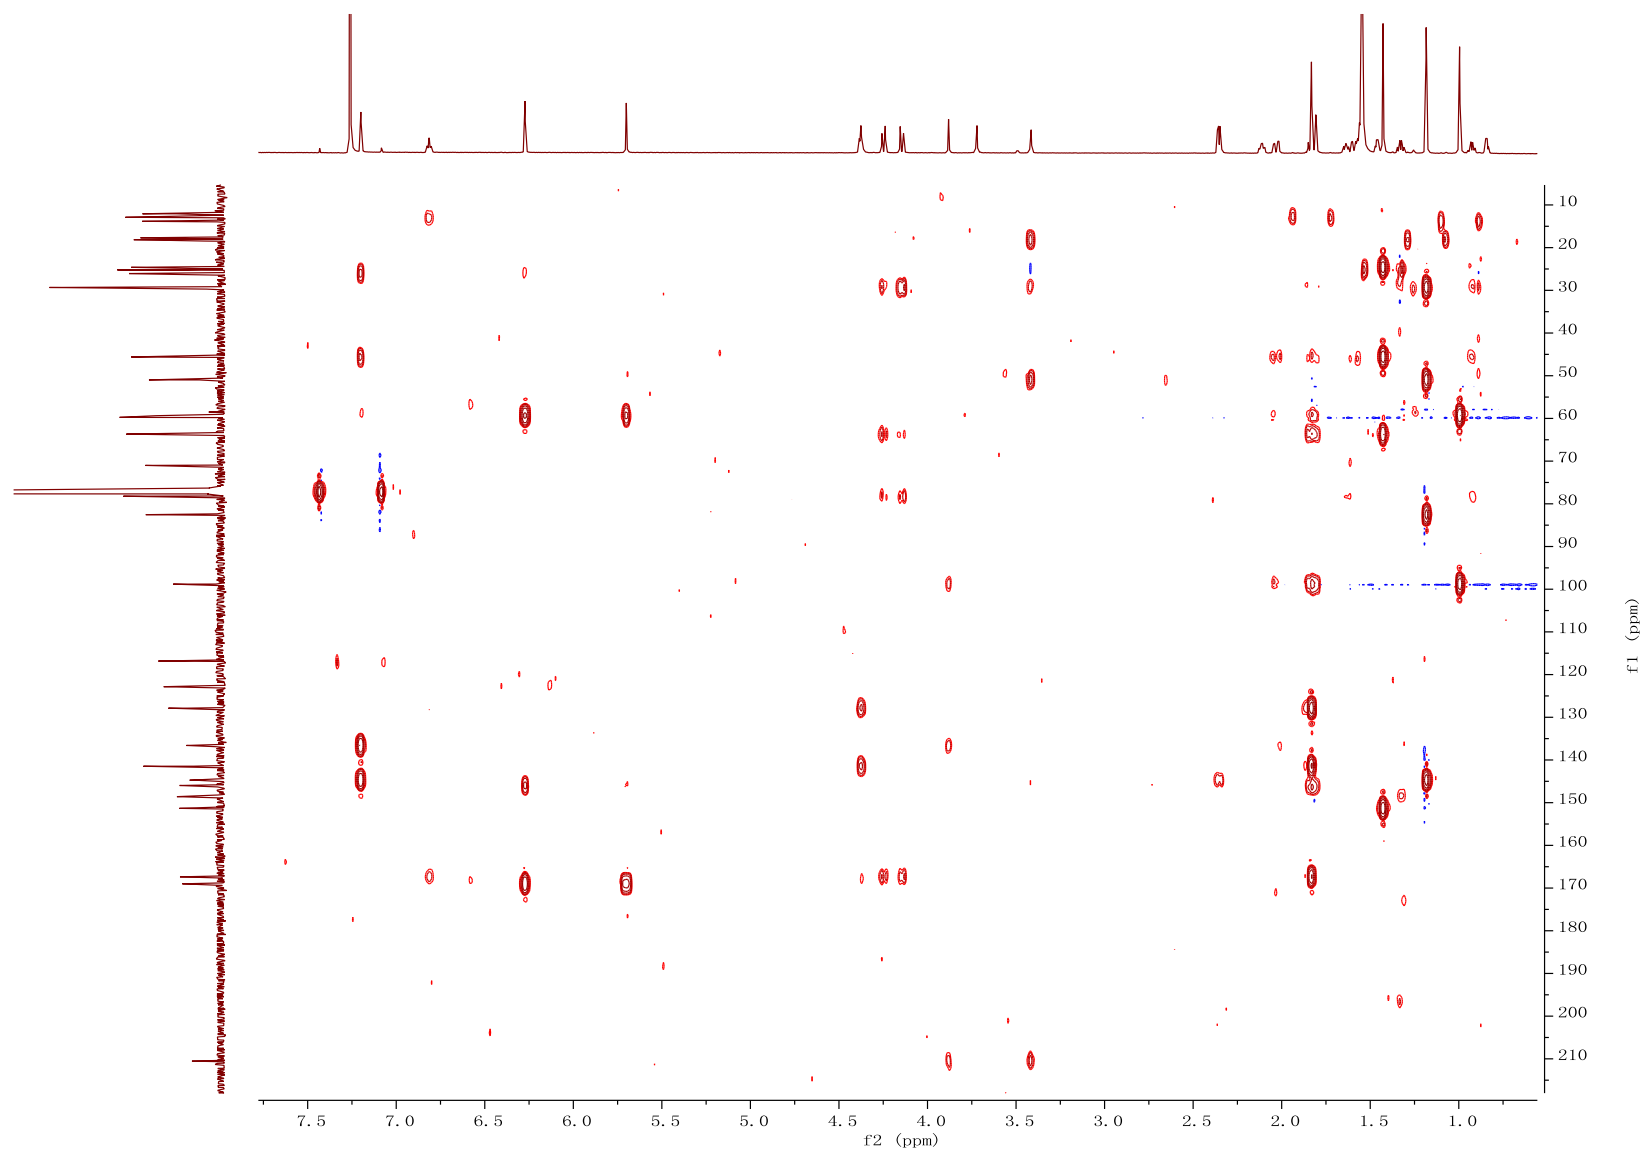

**Figure S58.**  $^1\text{H}$ - $^1\text{H}$  COSY spectrum of chlorahupetone G (7) in  $\text{CDCl}_3$

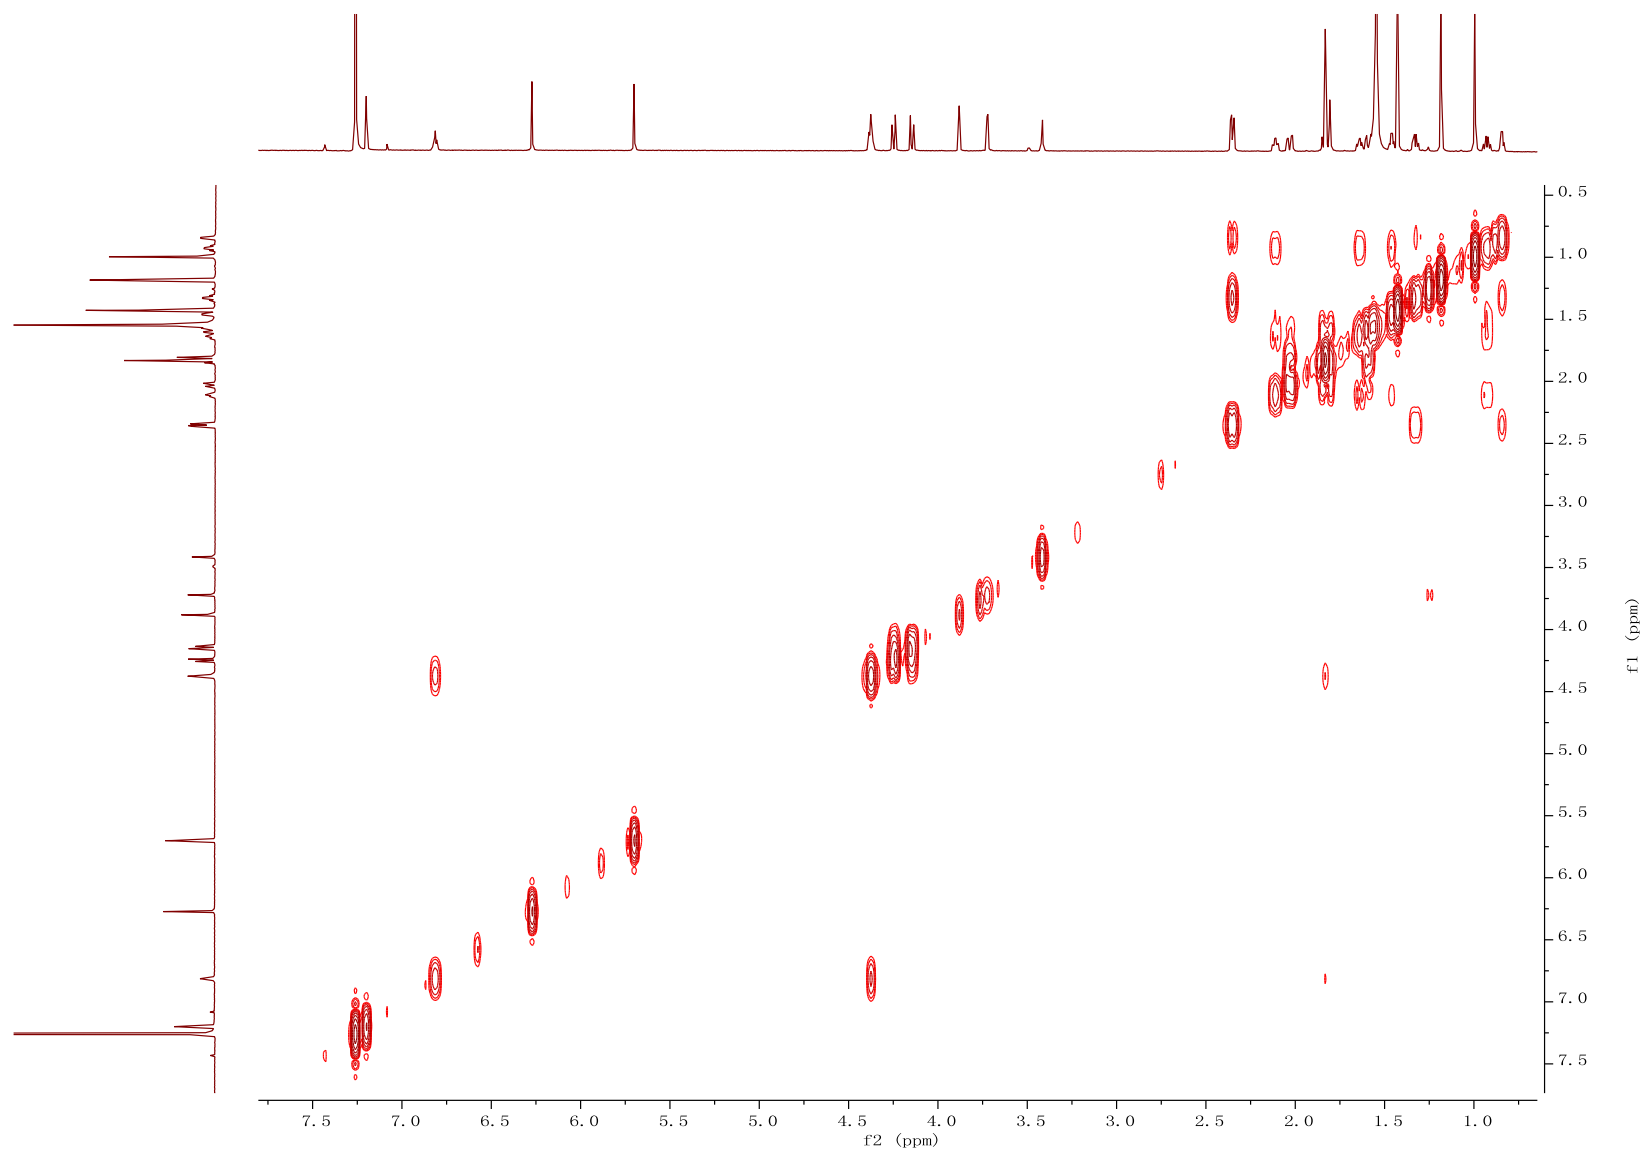

**Figure S59.** NOESY spectrum of chlorahupetone G (7) in CDCl<sub>3</sub>

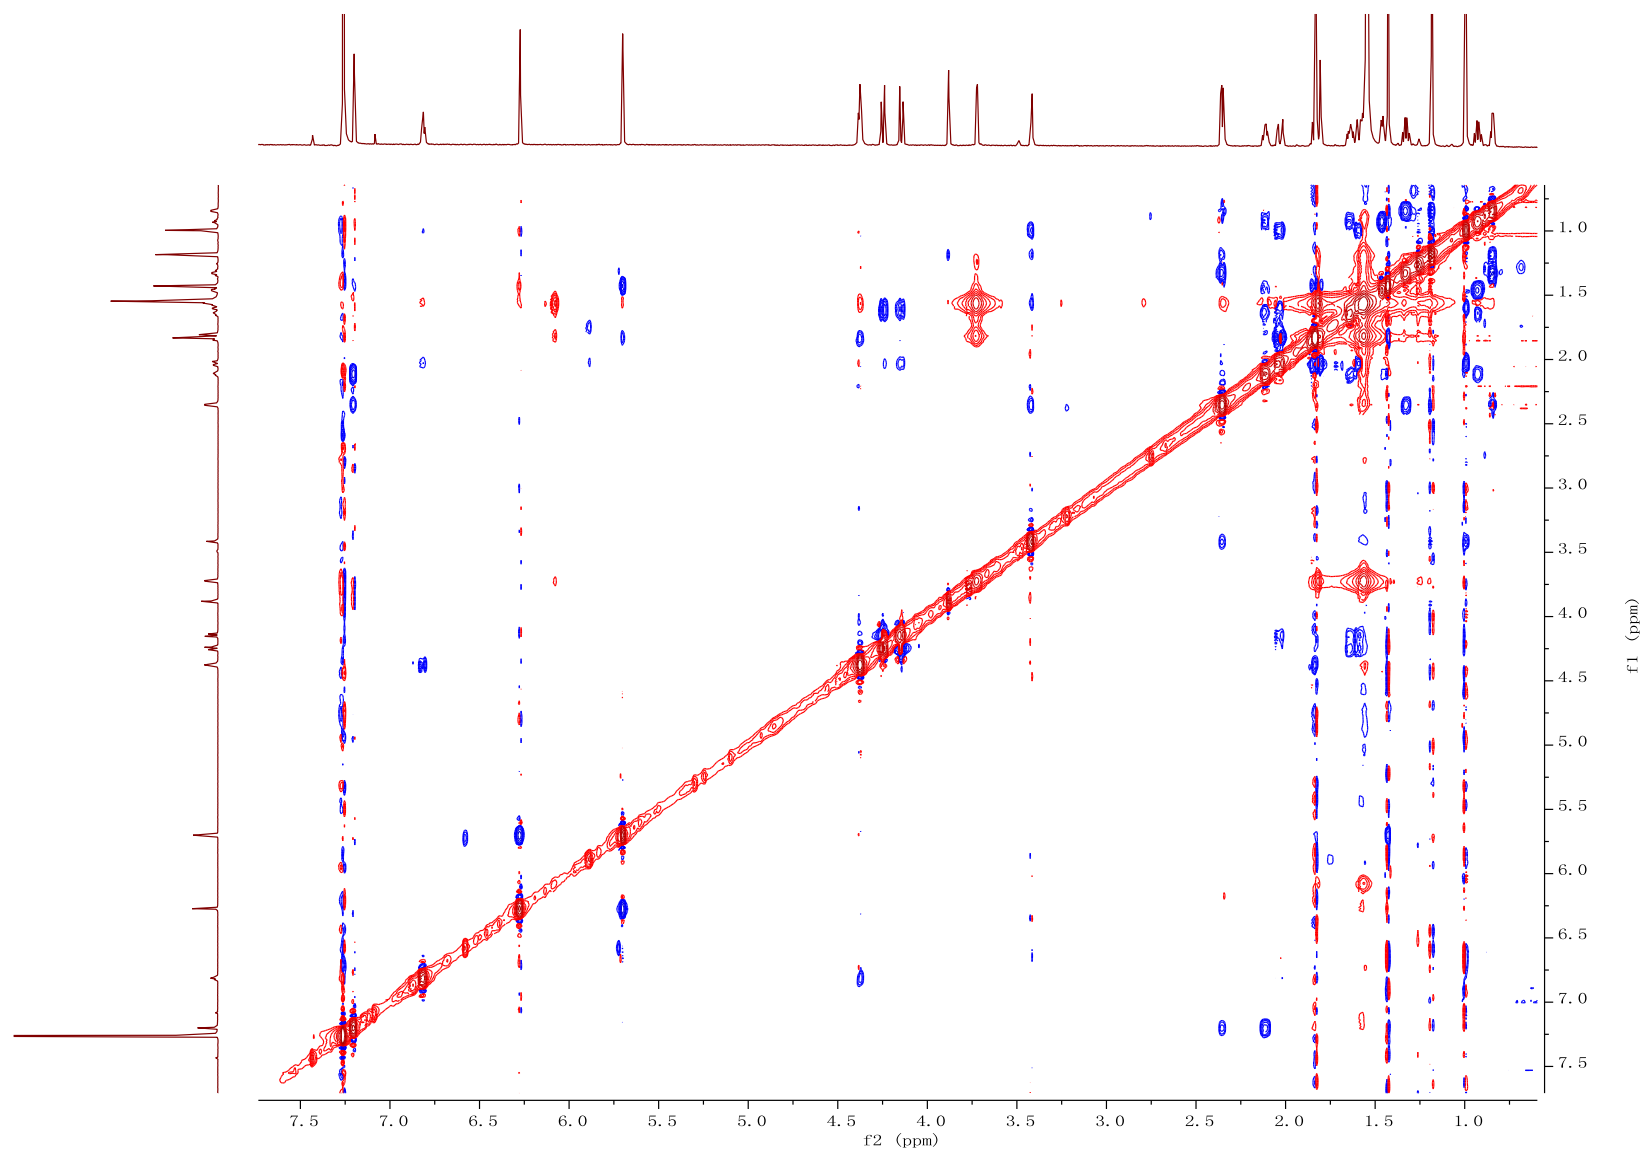



Figure S60. (-)-HRESIMS spectrum of chlorahupetone G (7)

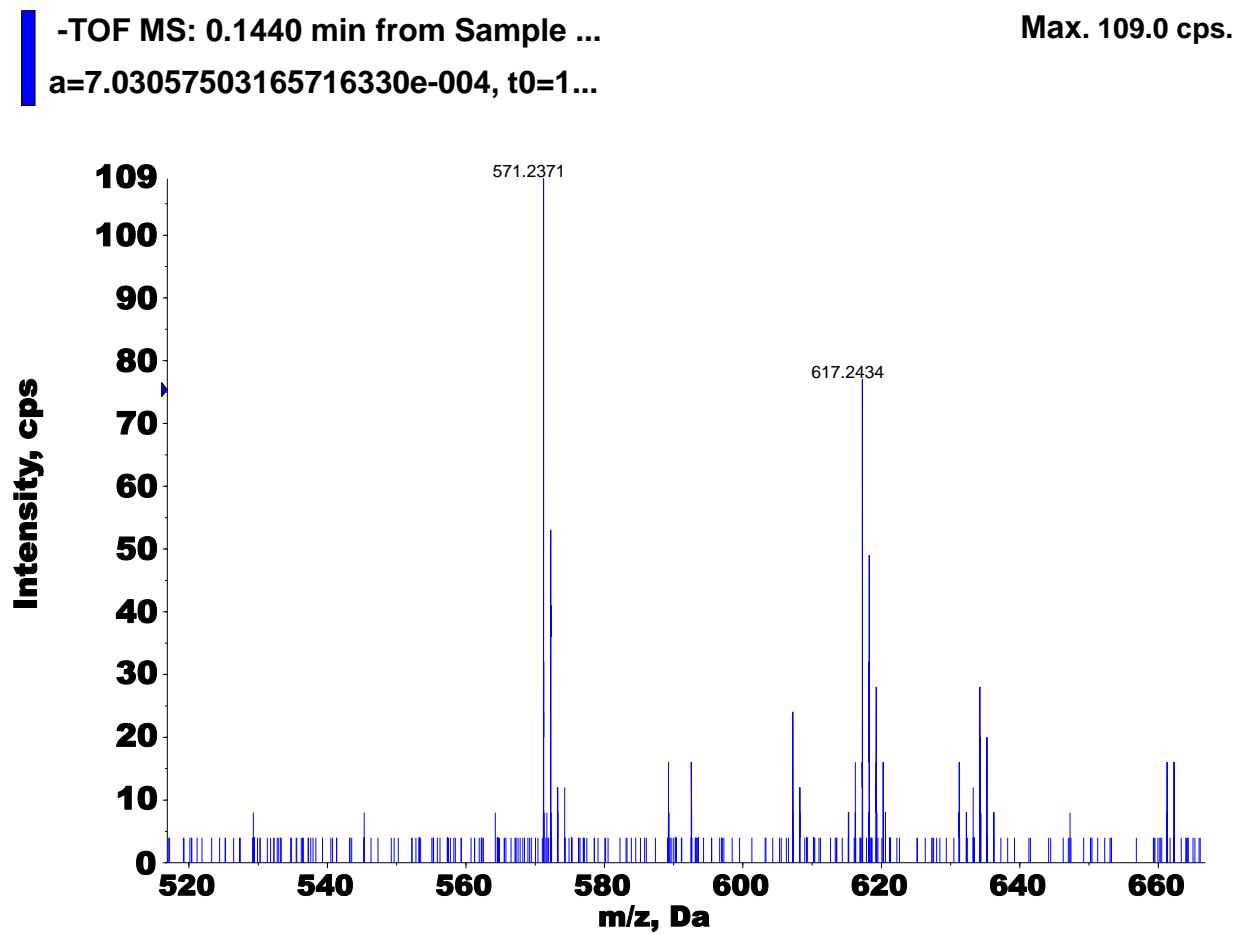

Figure S61. IR spectrum of chlorahupetone G (7)

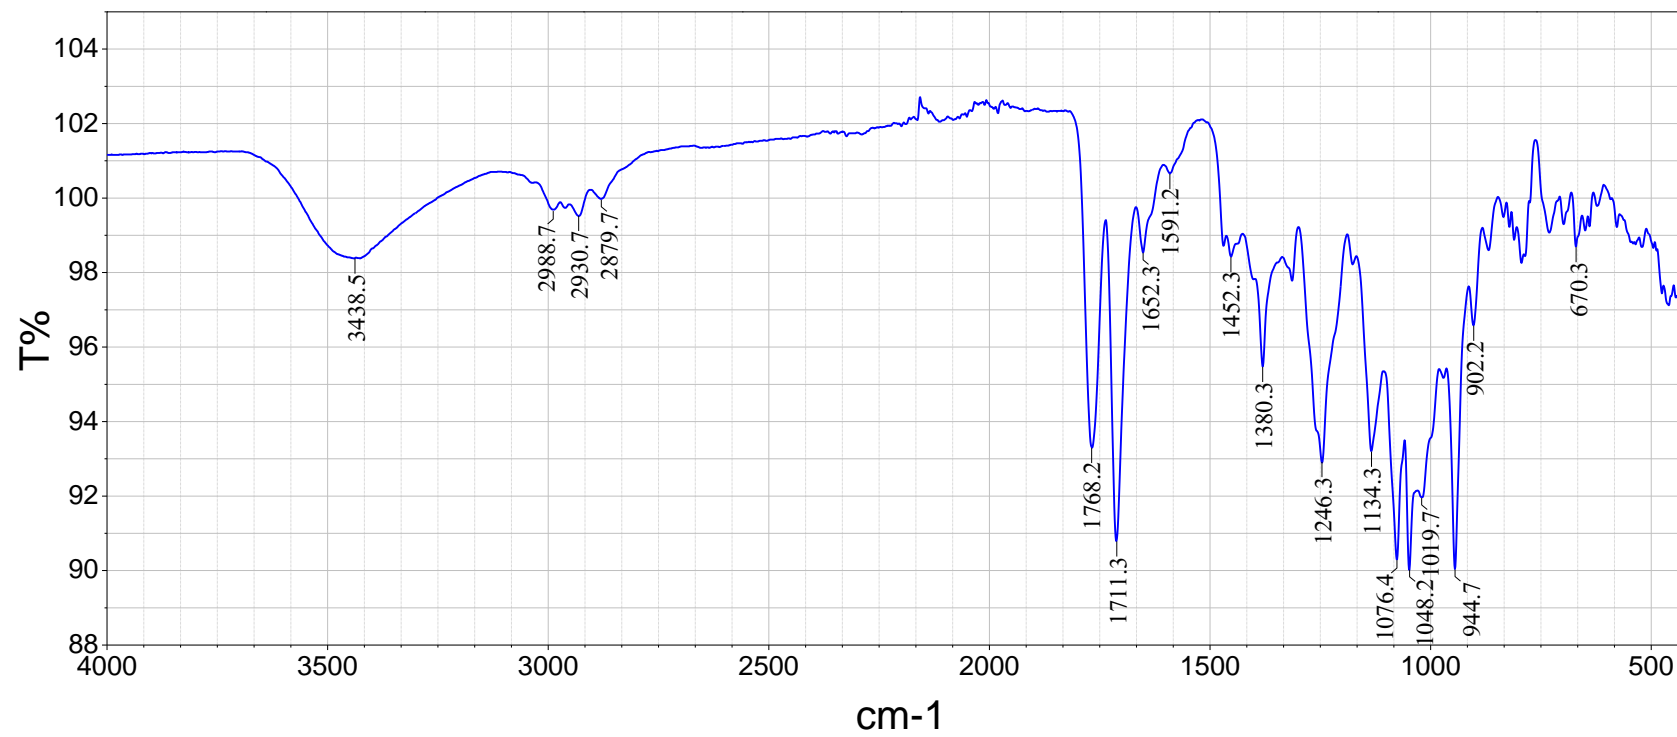

Figure S62. <sup>1</sup>H NMR spectrum of chlorahupetone H (8) in CDCl<sub>3</sub>

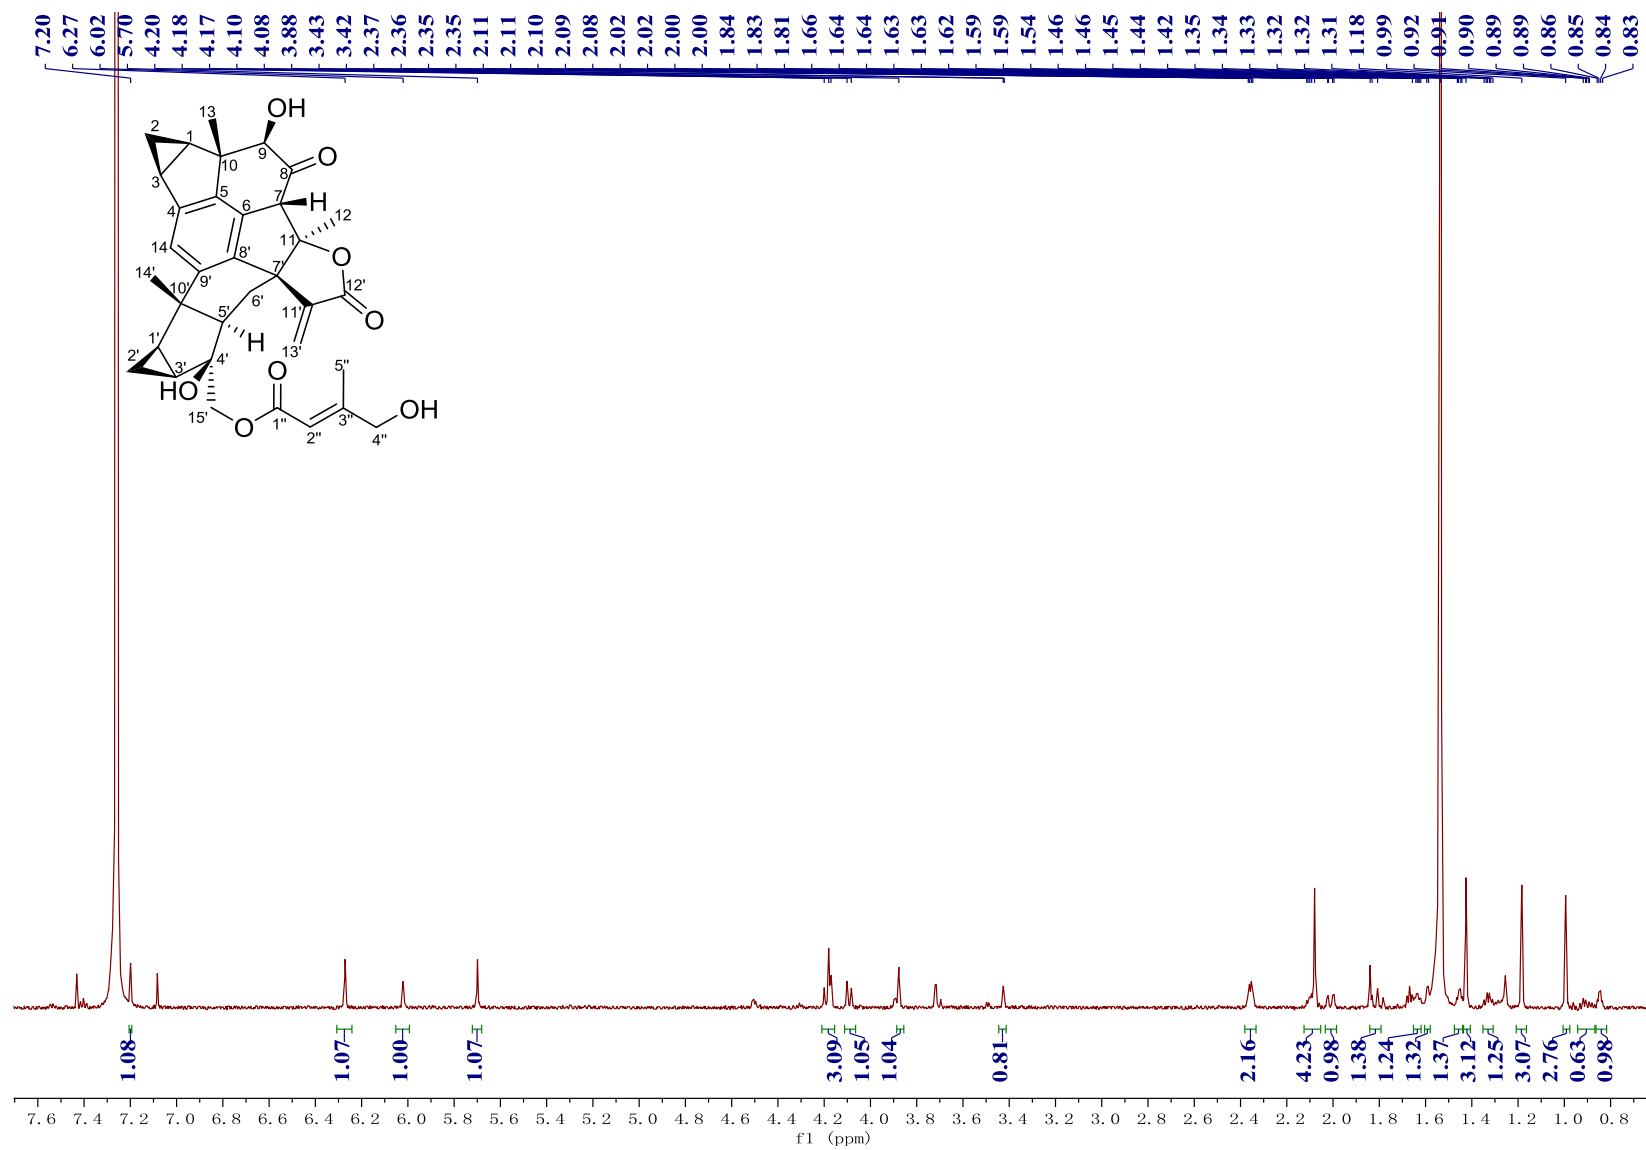

Figure S63.  $^{13}\text{C}$  NMR and DEPT spectrum of chlorahupetone H (**8**) in  $\text{CDCl}_3$

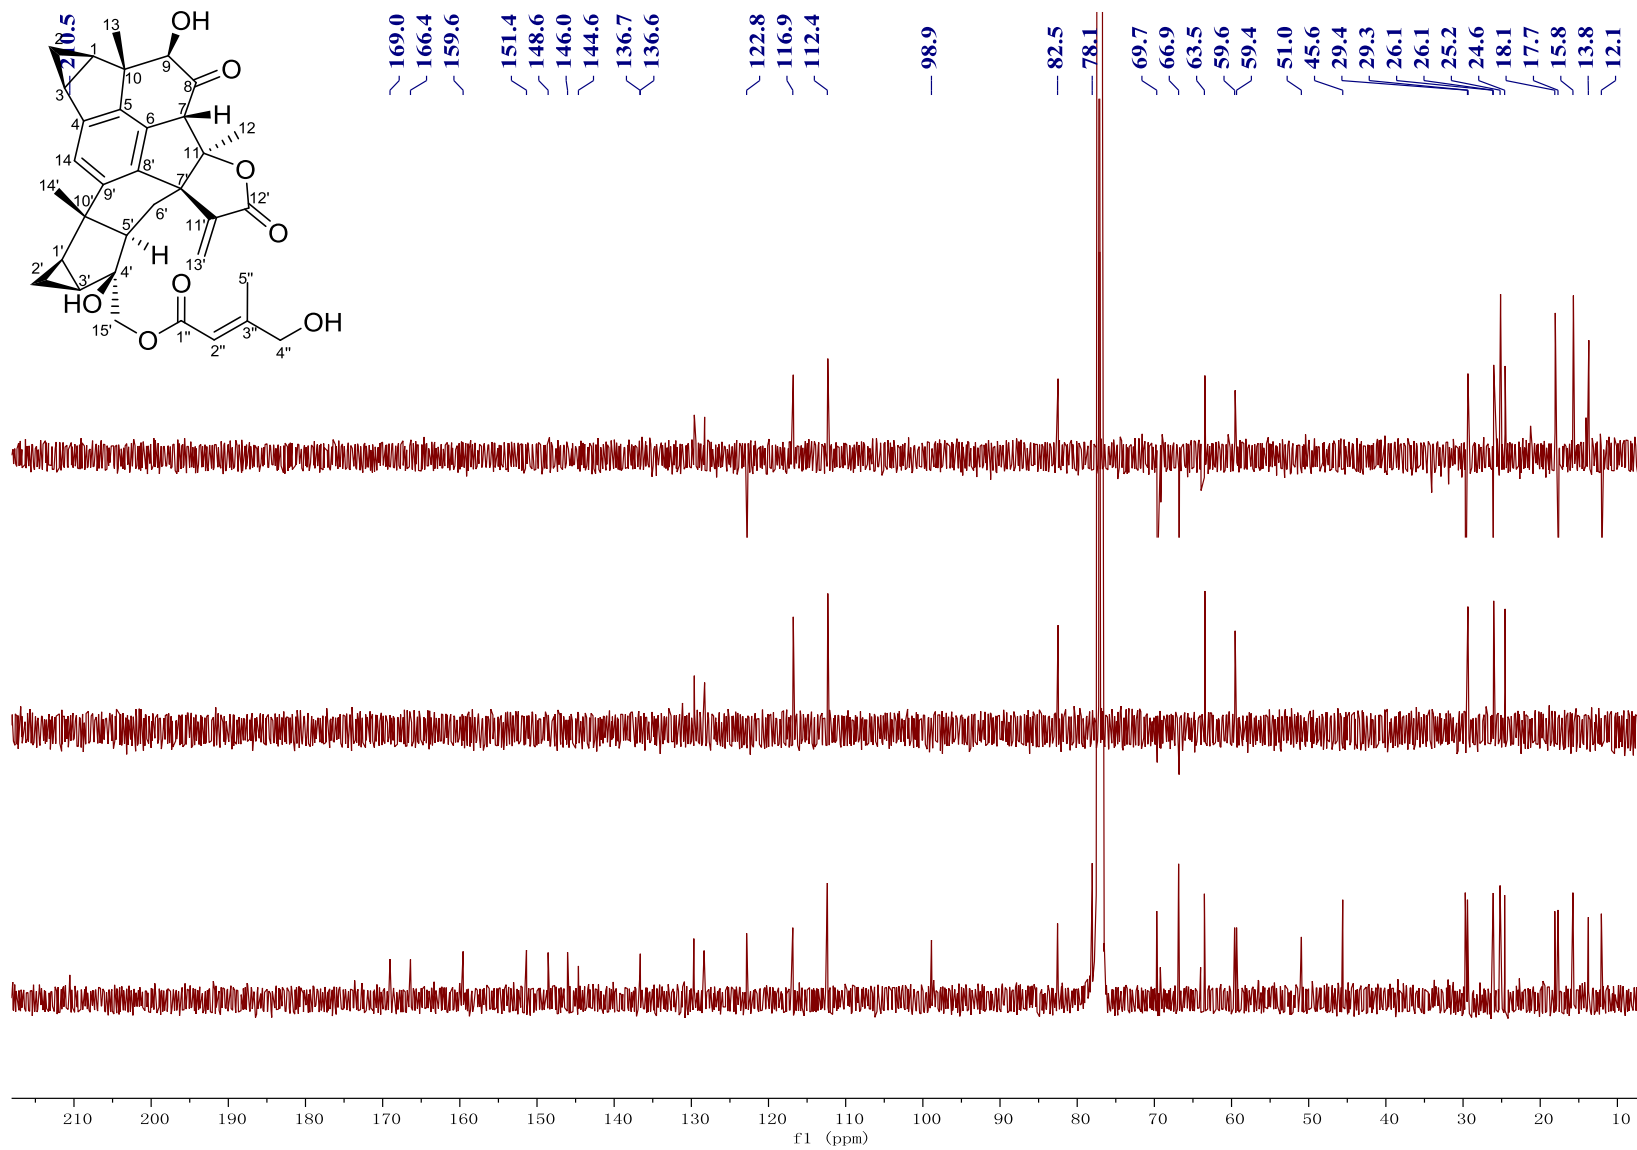

**Figure S64.** HSQC spectrum of chlorahupetone H (**8**) in CDCl<sub>3</sub>

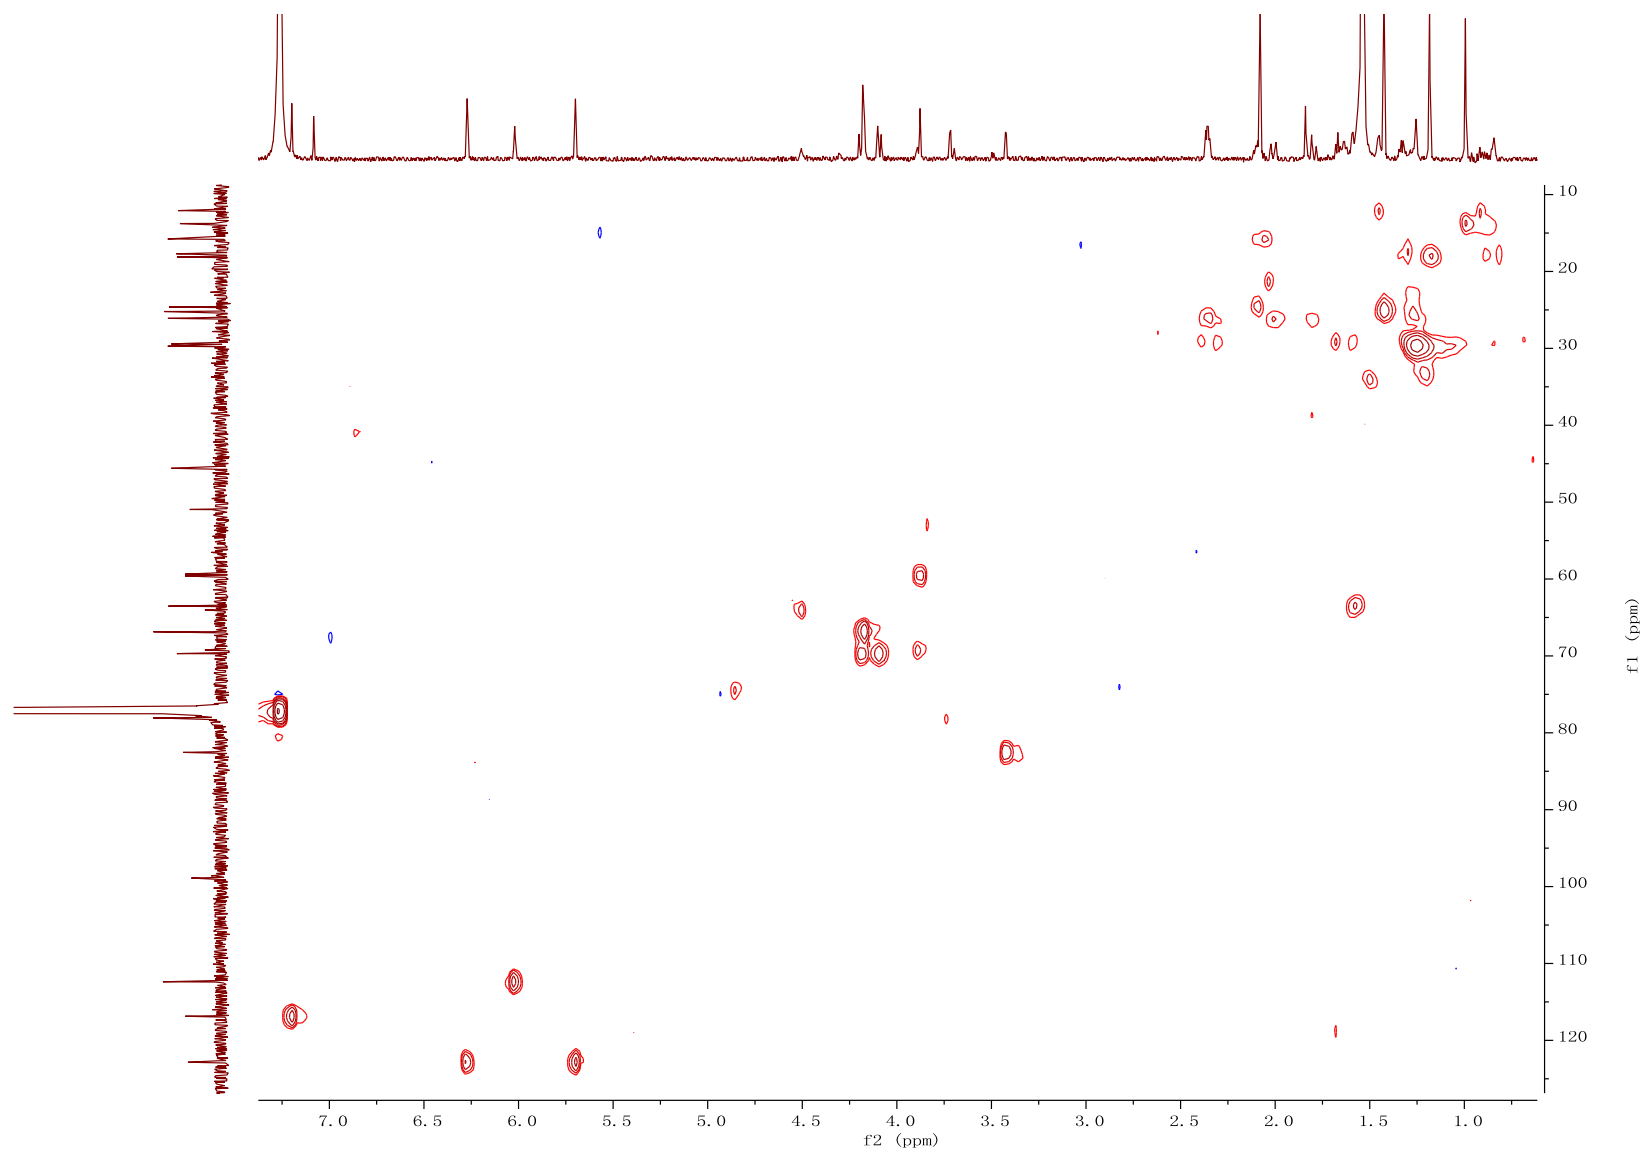

Figure S65. HMBC spectrum of chlorahupetone H (8) in CDCl<sub>3</sub>

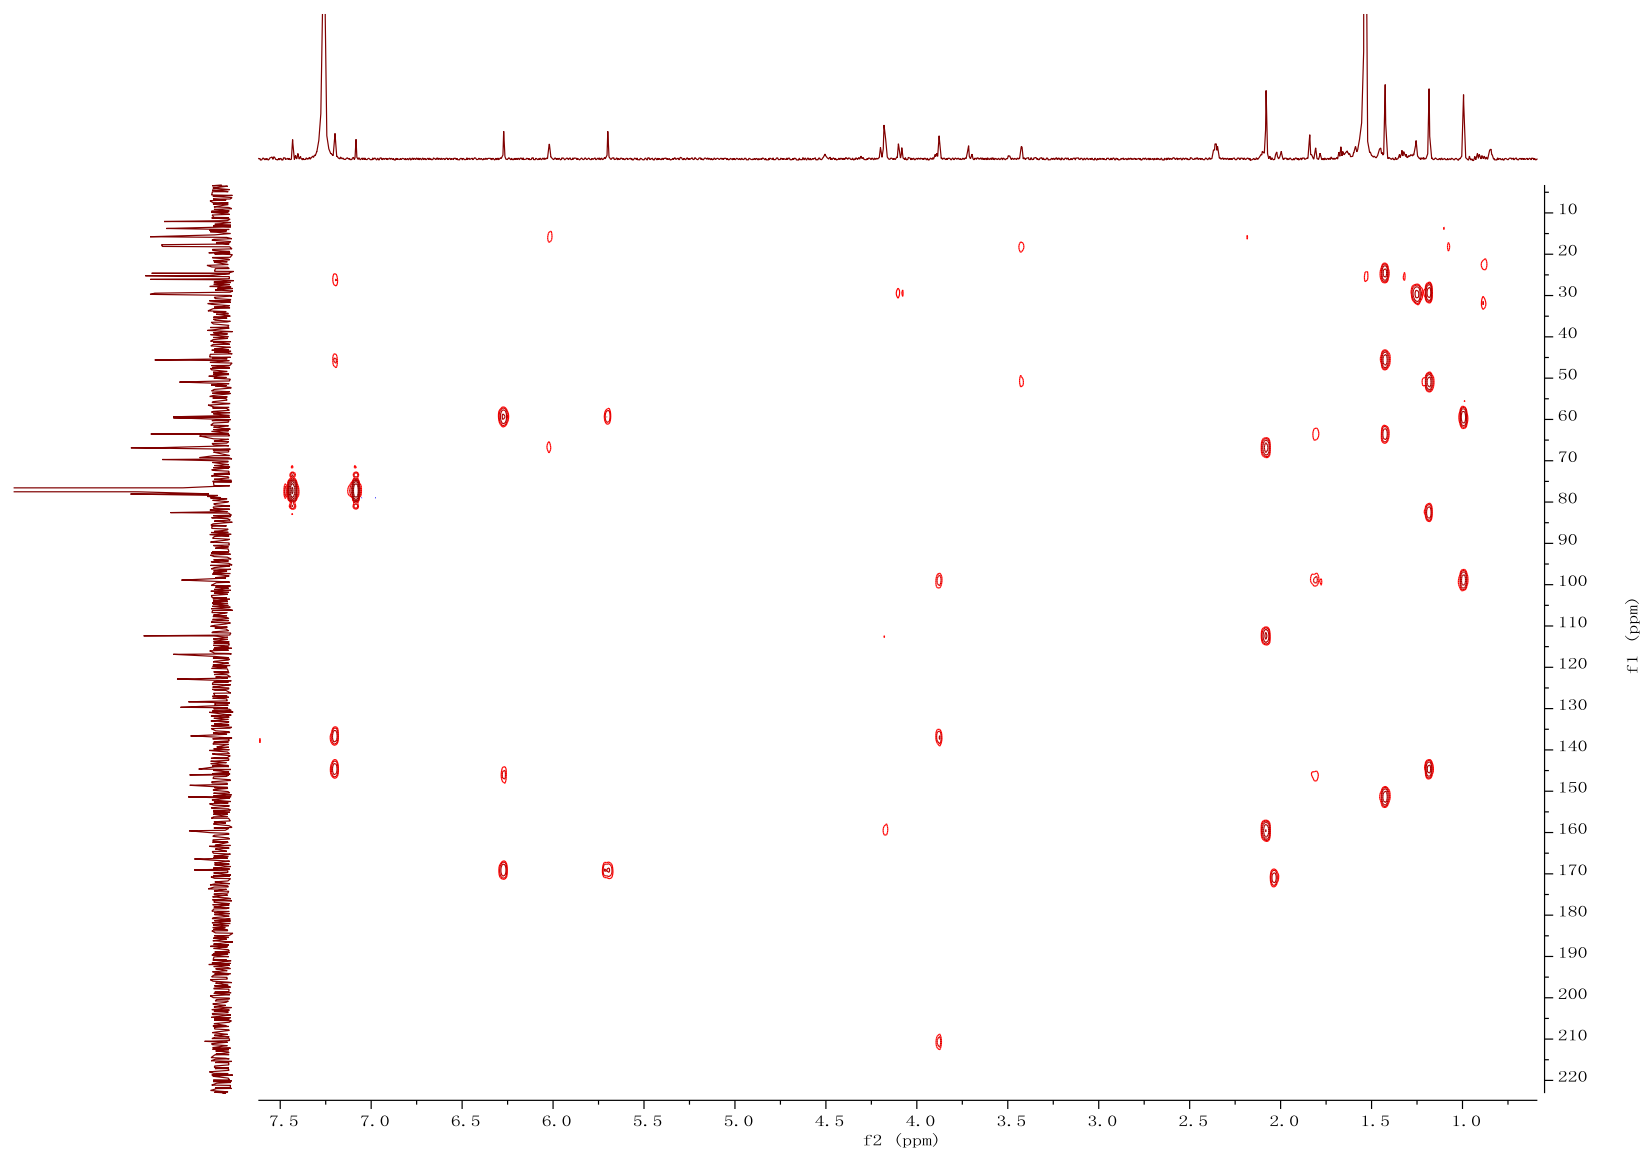

**Figure S66.**  $^1\text{H}$ - $^1\text{H}$  COSY spectrum of chlorahupetone H (**8**) in  $\text{CDCl}_3$

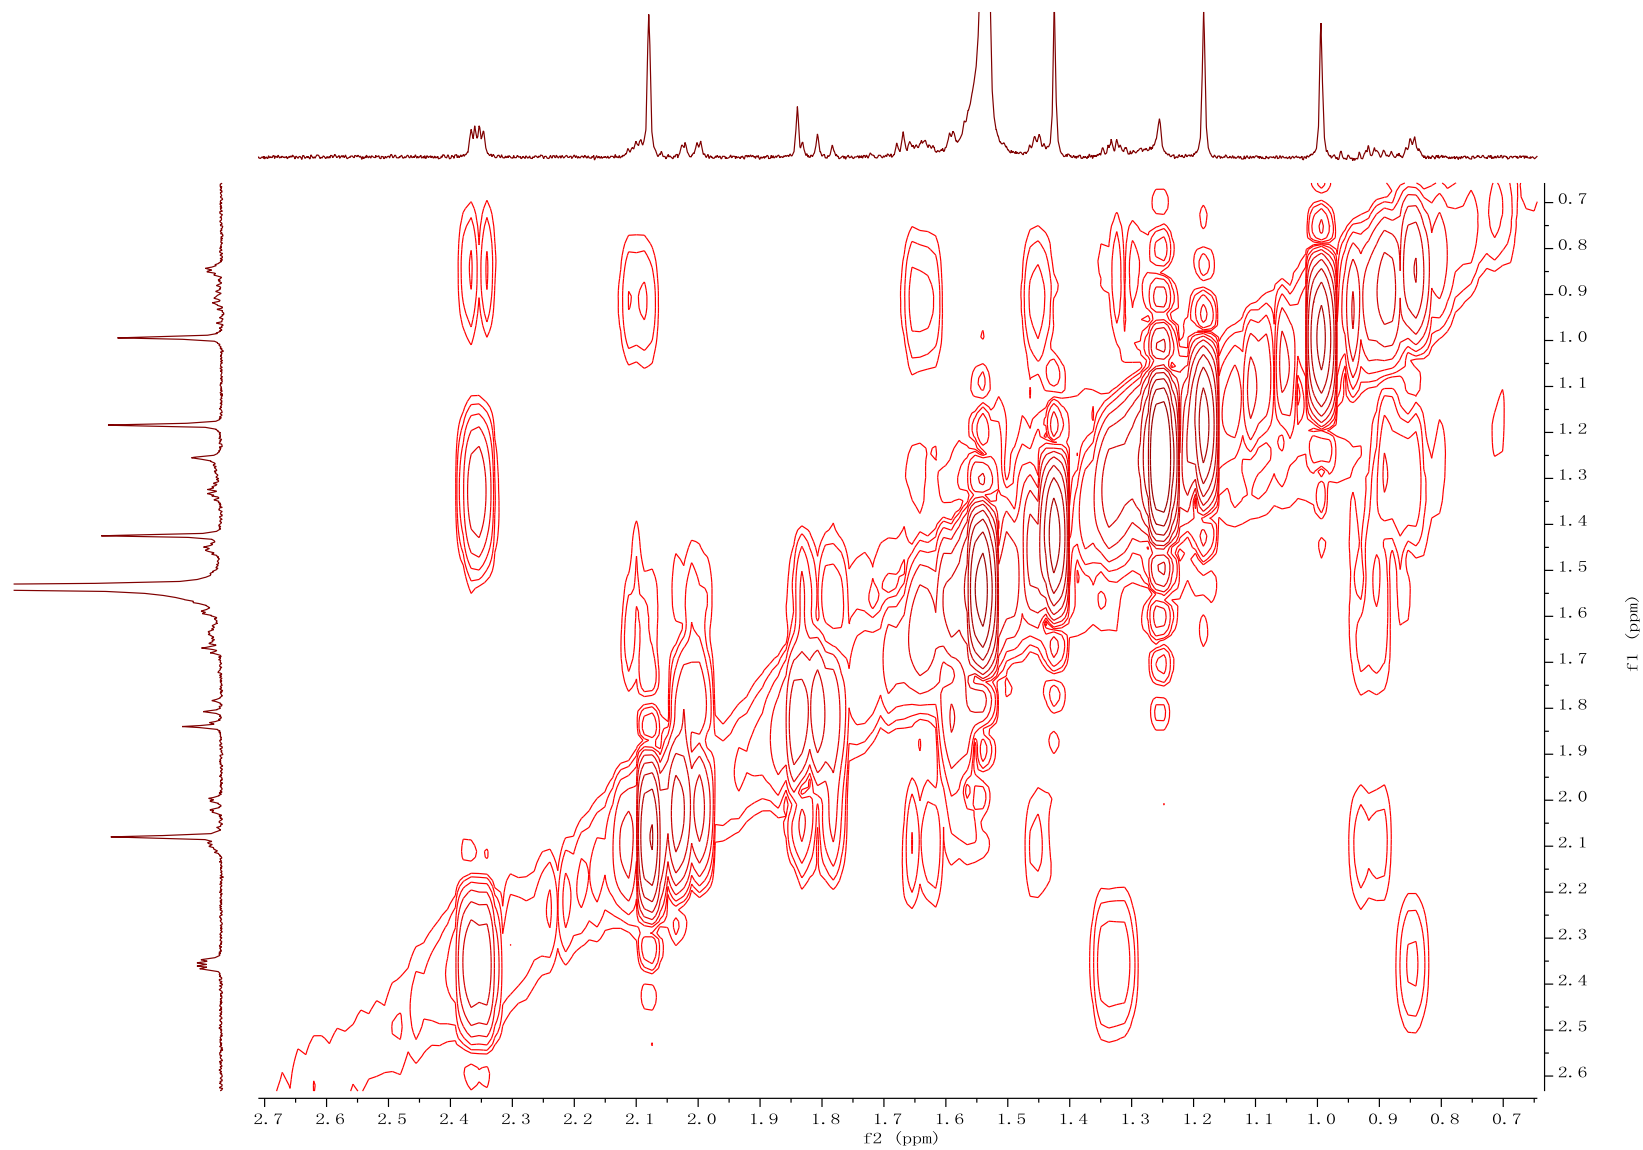

Figure S67. NOESY spectrum of chlorahupetone H (**8**) in CDCl<sub>3</sub>

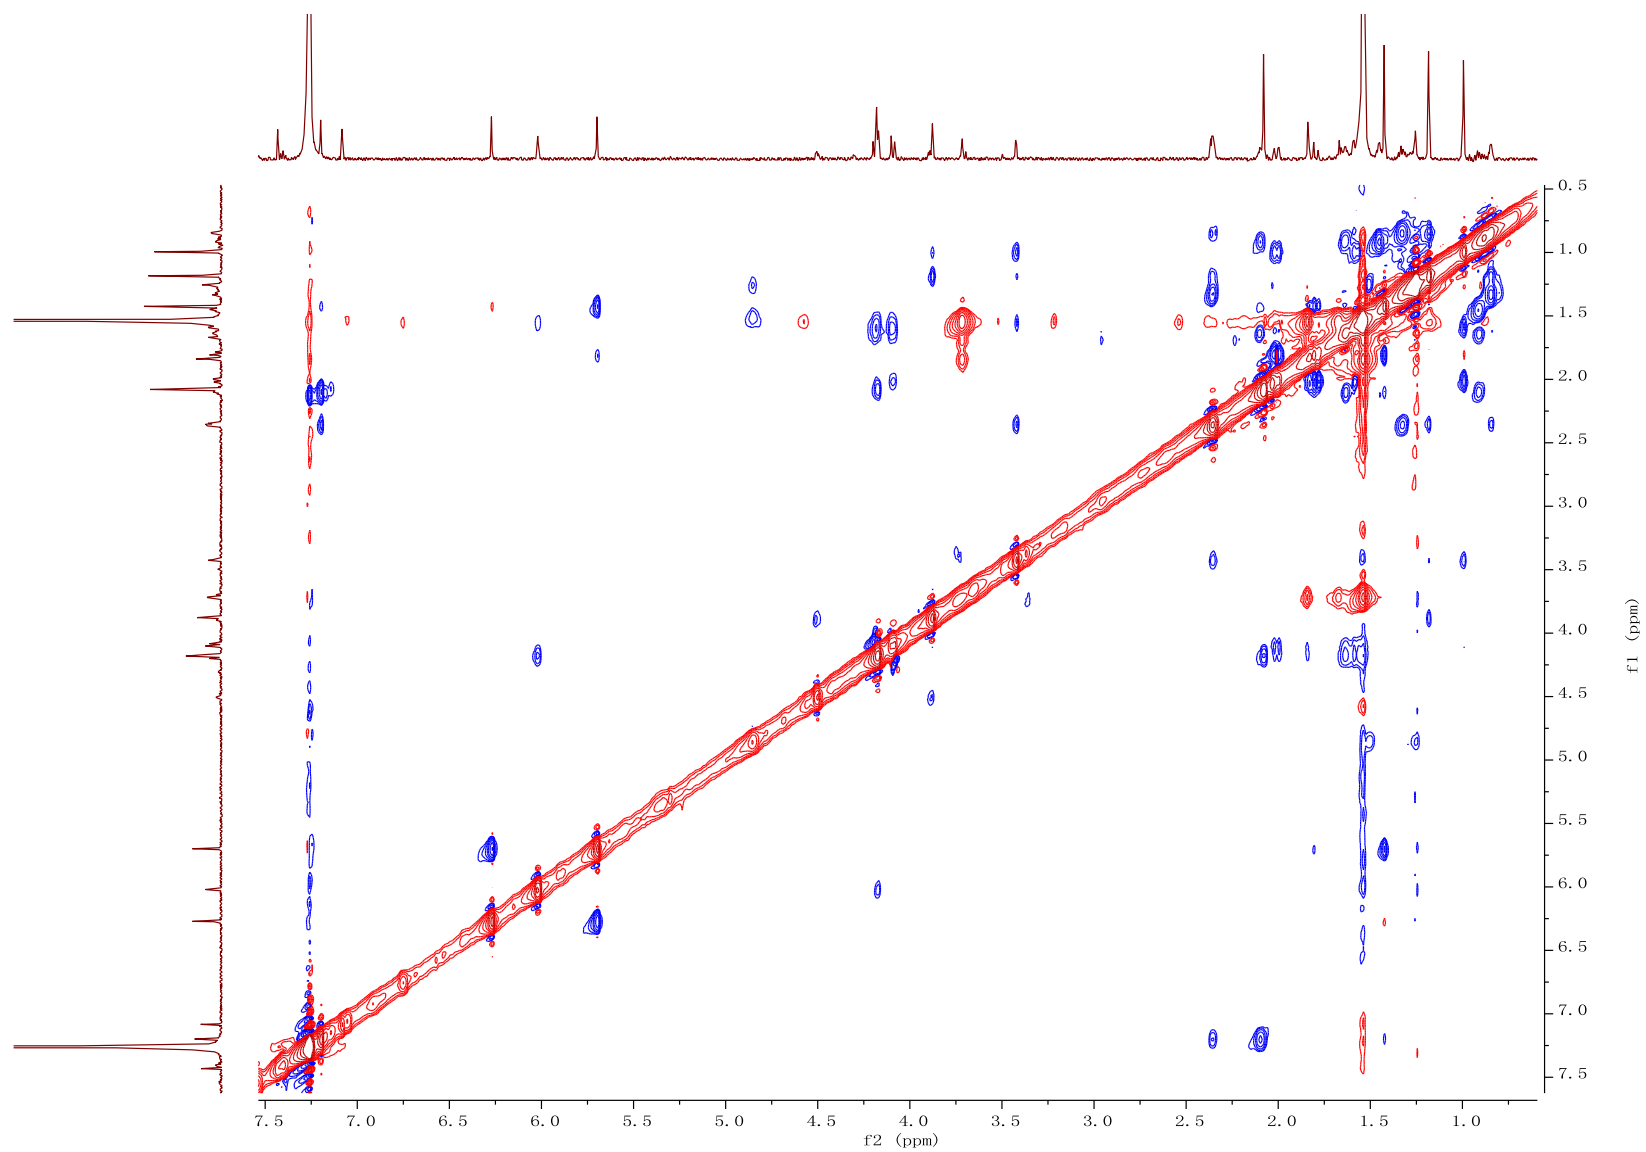



Figure S68. (+)-HRESIMS spectrum of chlorahupetone H (8)

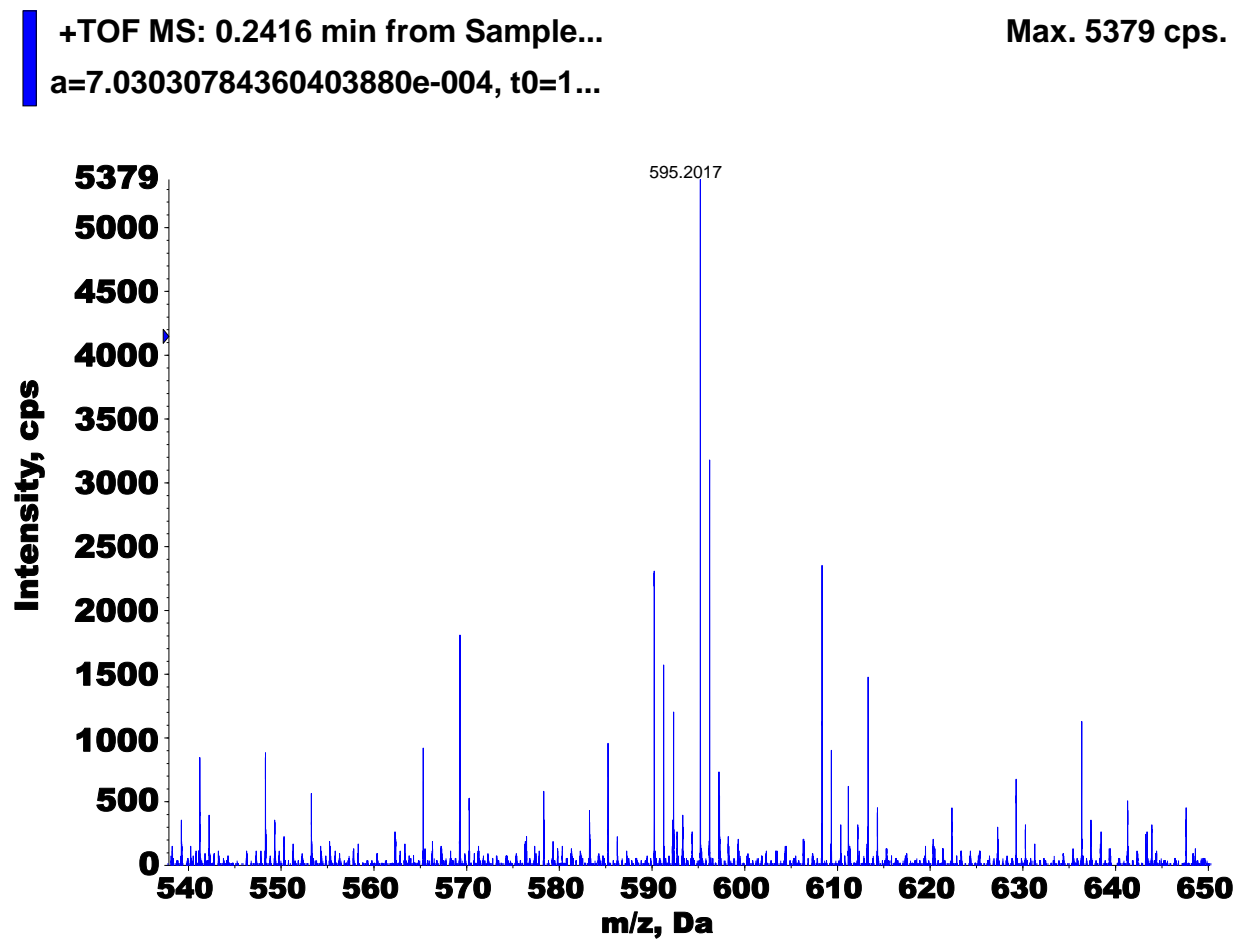

Figure S69. IR spectrum of chlorahupetone H (8)

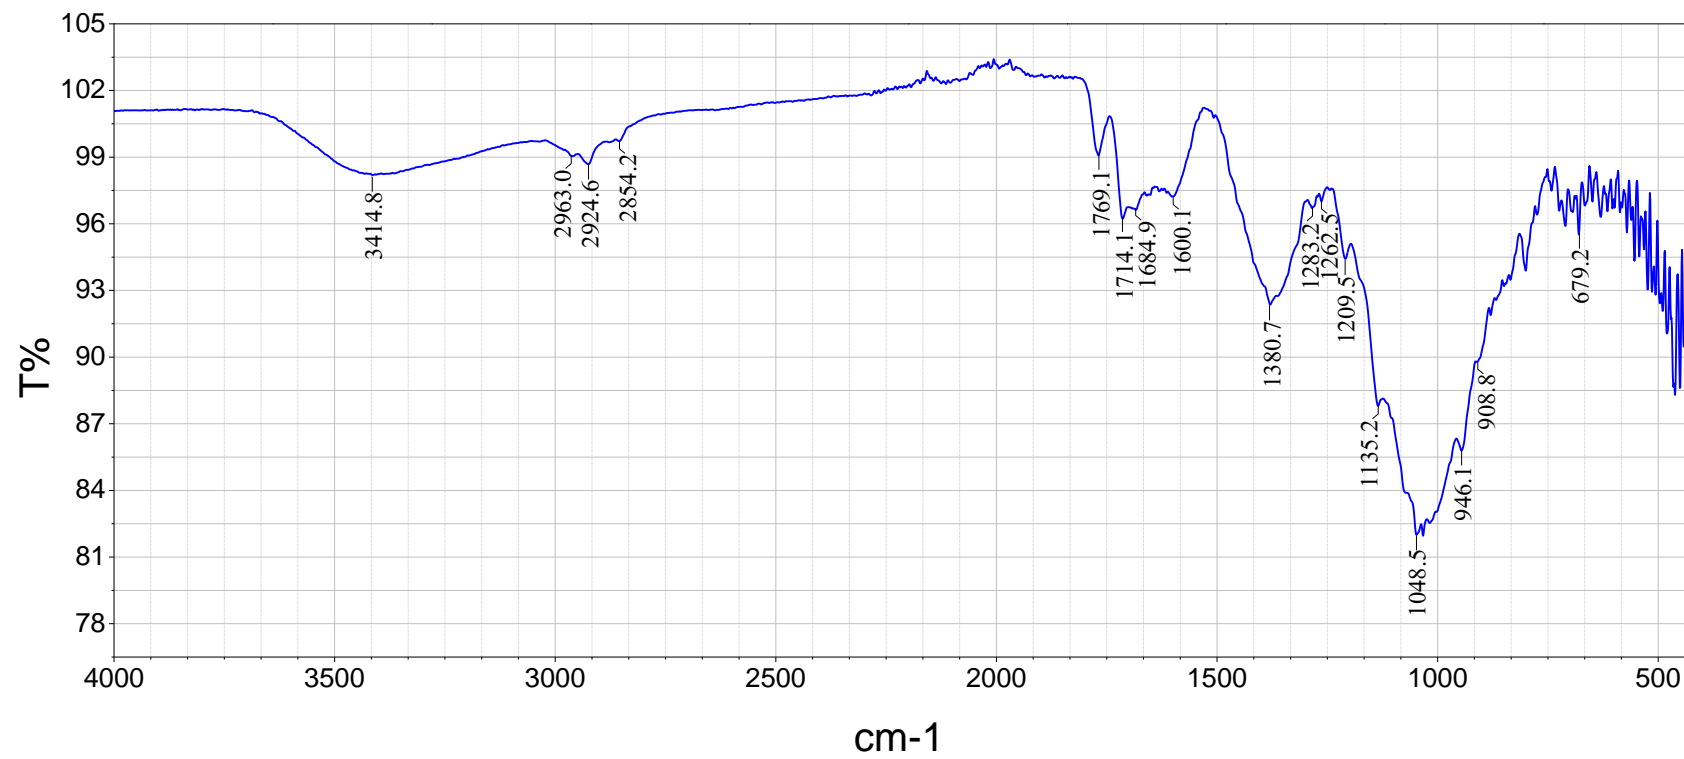

Figure S70. <sup>1</sup>H NMR spectrum of chlorahupetone I (9) in CDCl<sub>3</sub>

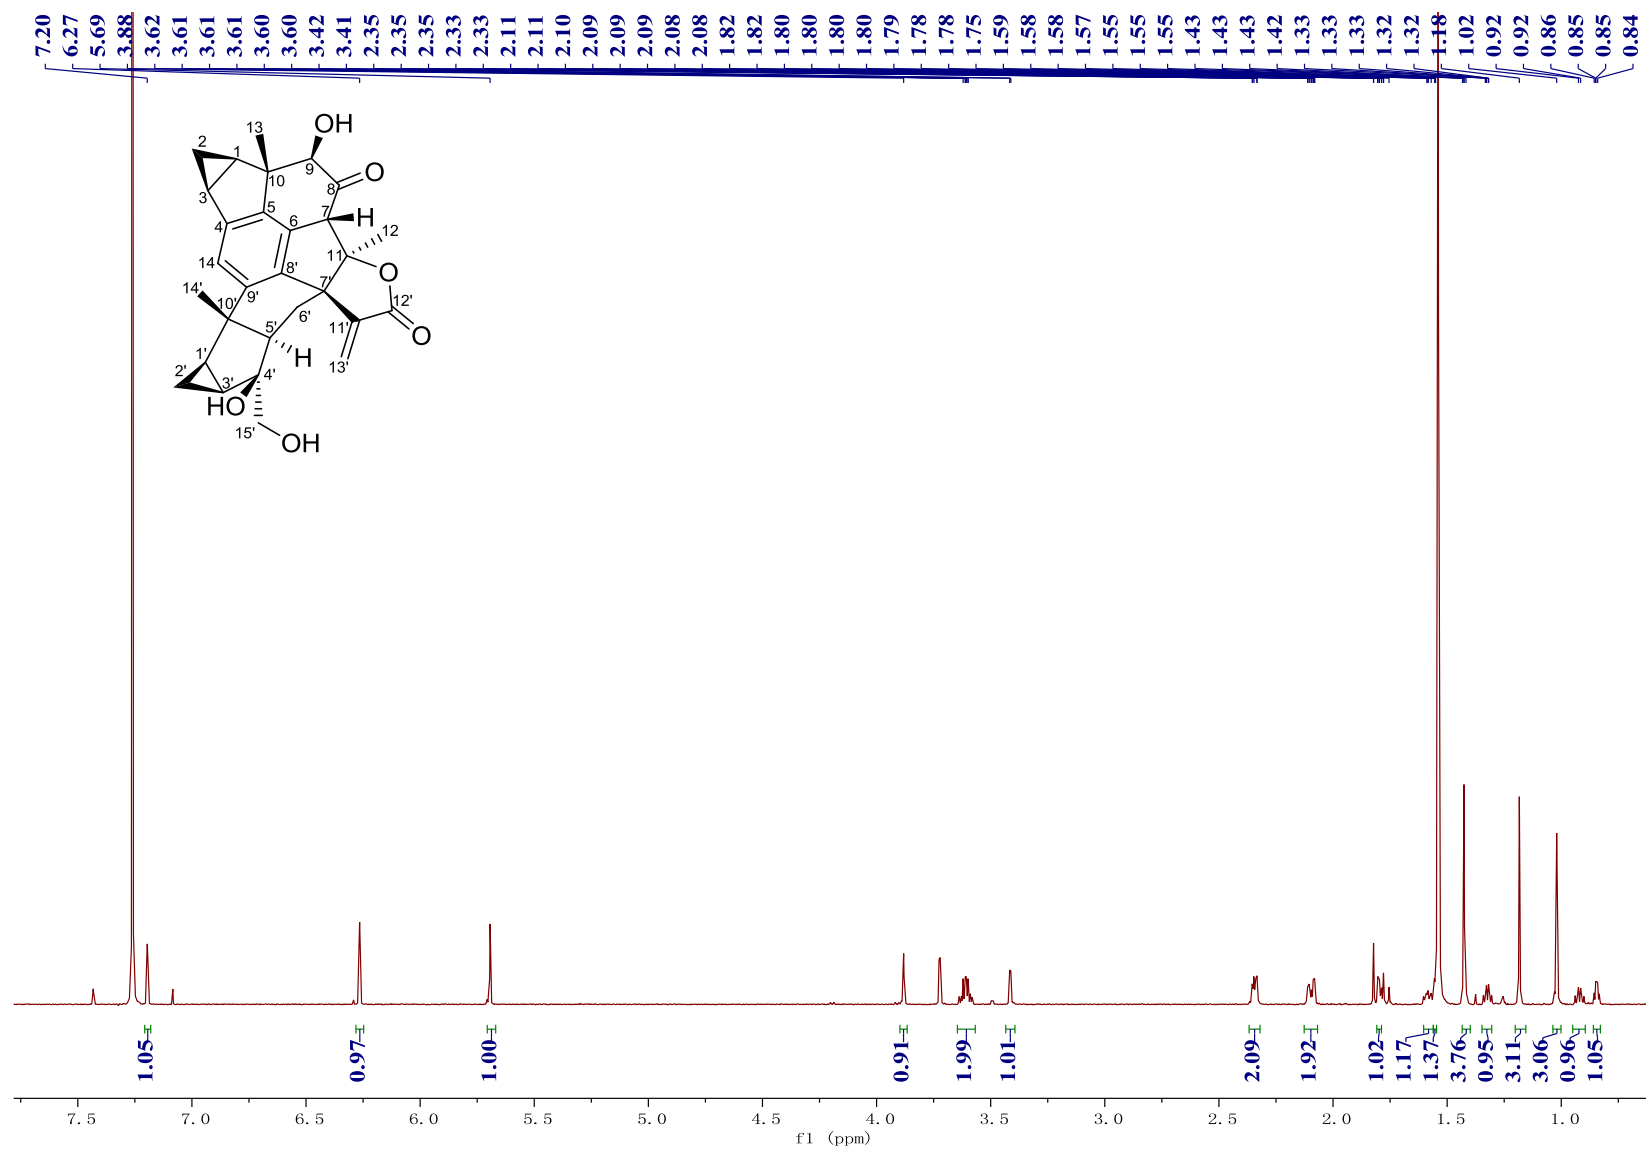

Figure S71.  $^{13}\text{C}$  NMR and DEPT spectrum of chlorahupetone I (**9**) in  $\text{CDCl}_3$

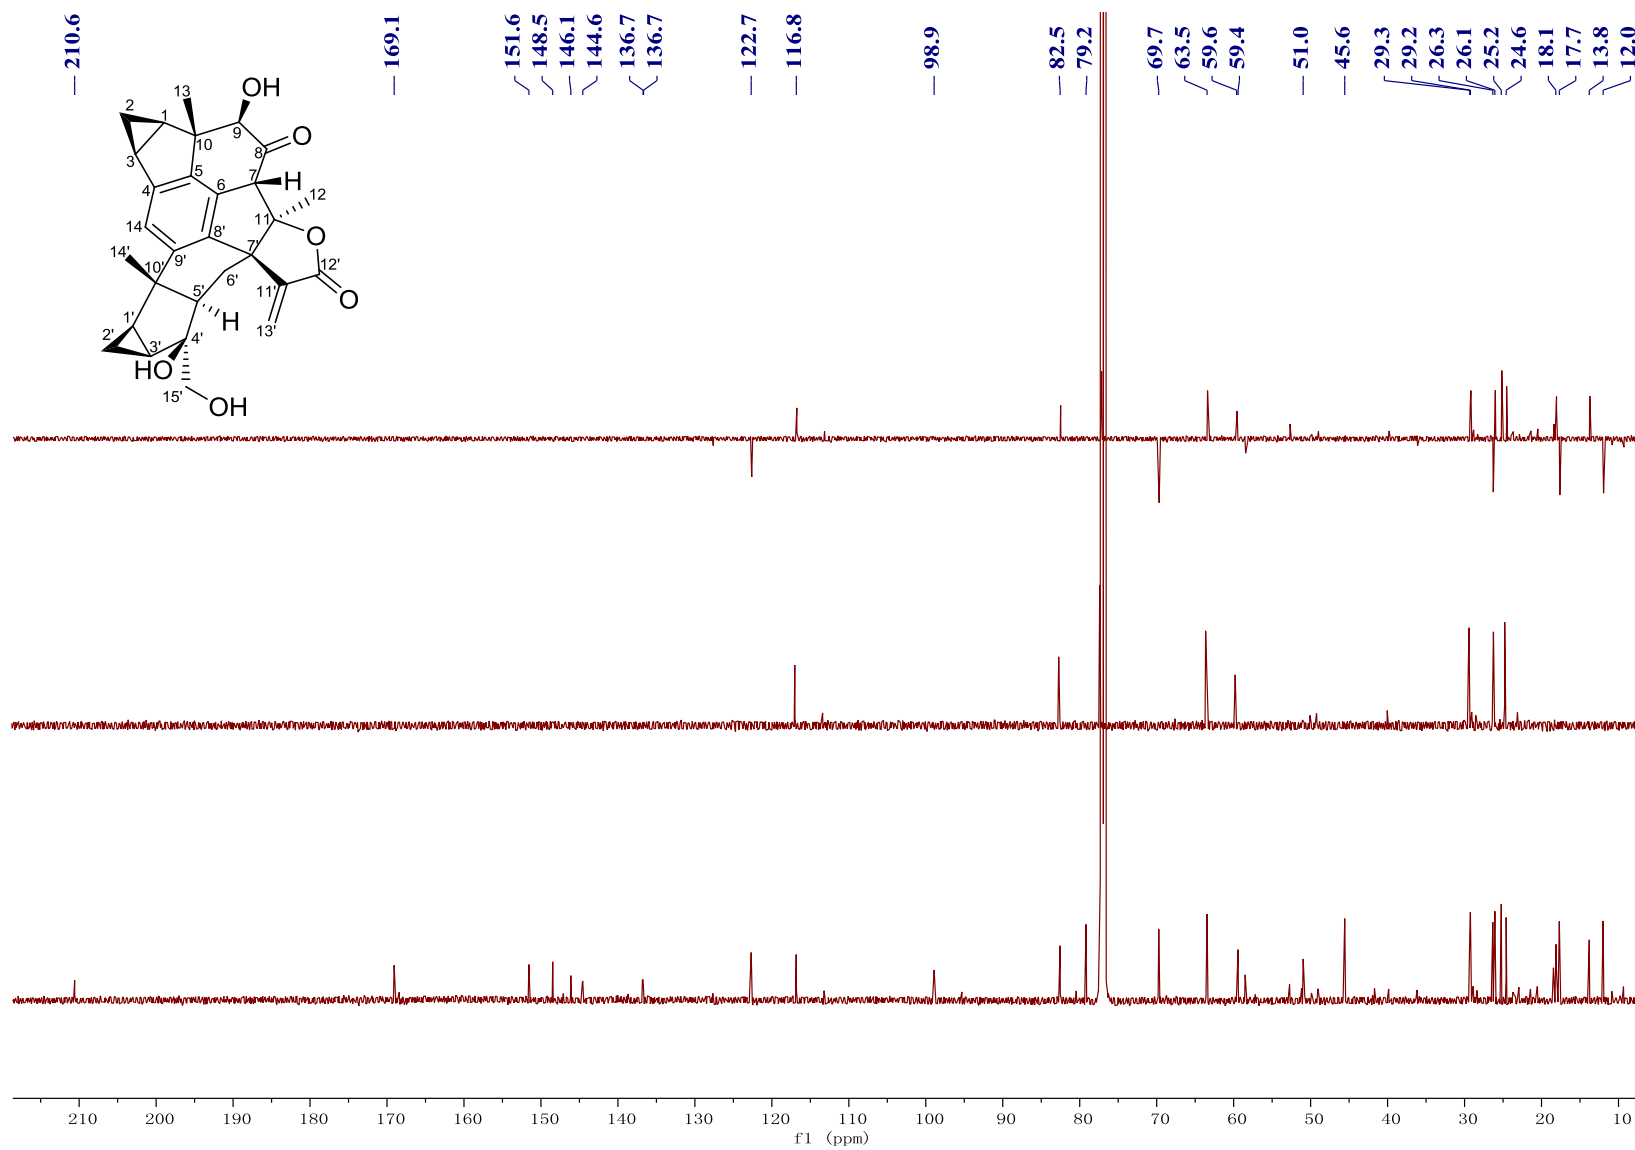

**Figure S72.** HSQC spectrum of chlorahupetone I (**9**) in CDCl<sub>3</sub>

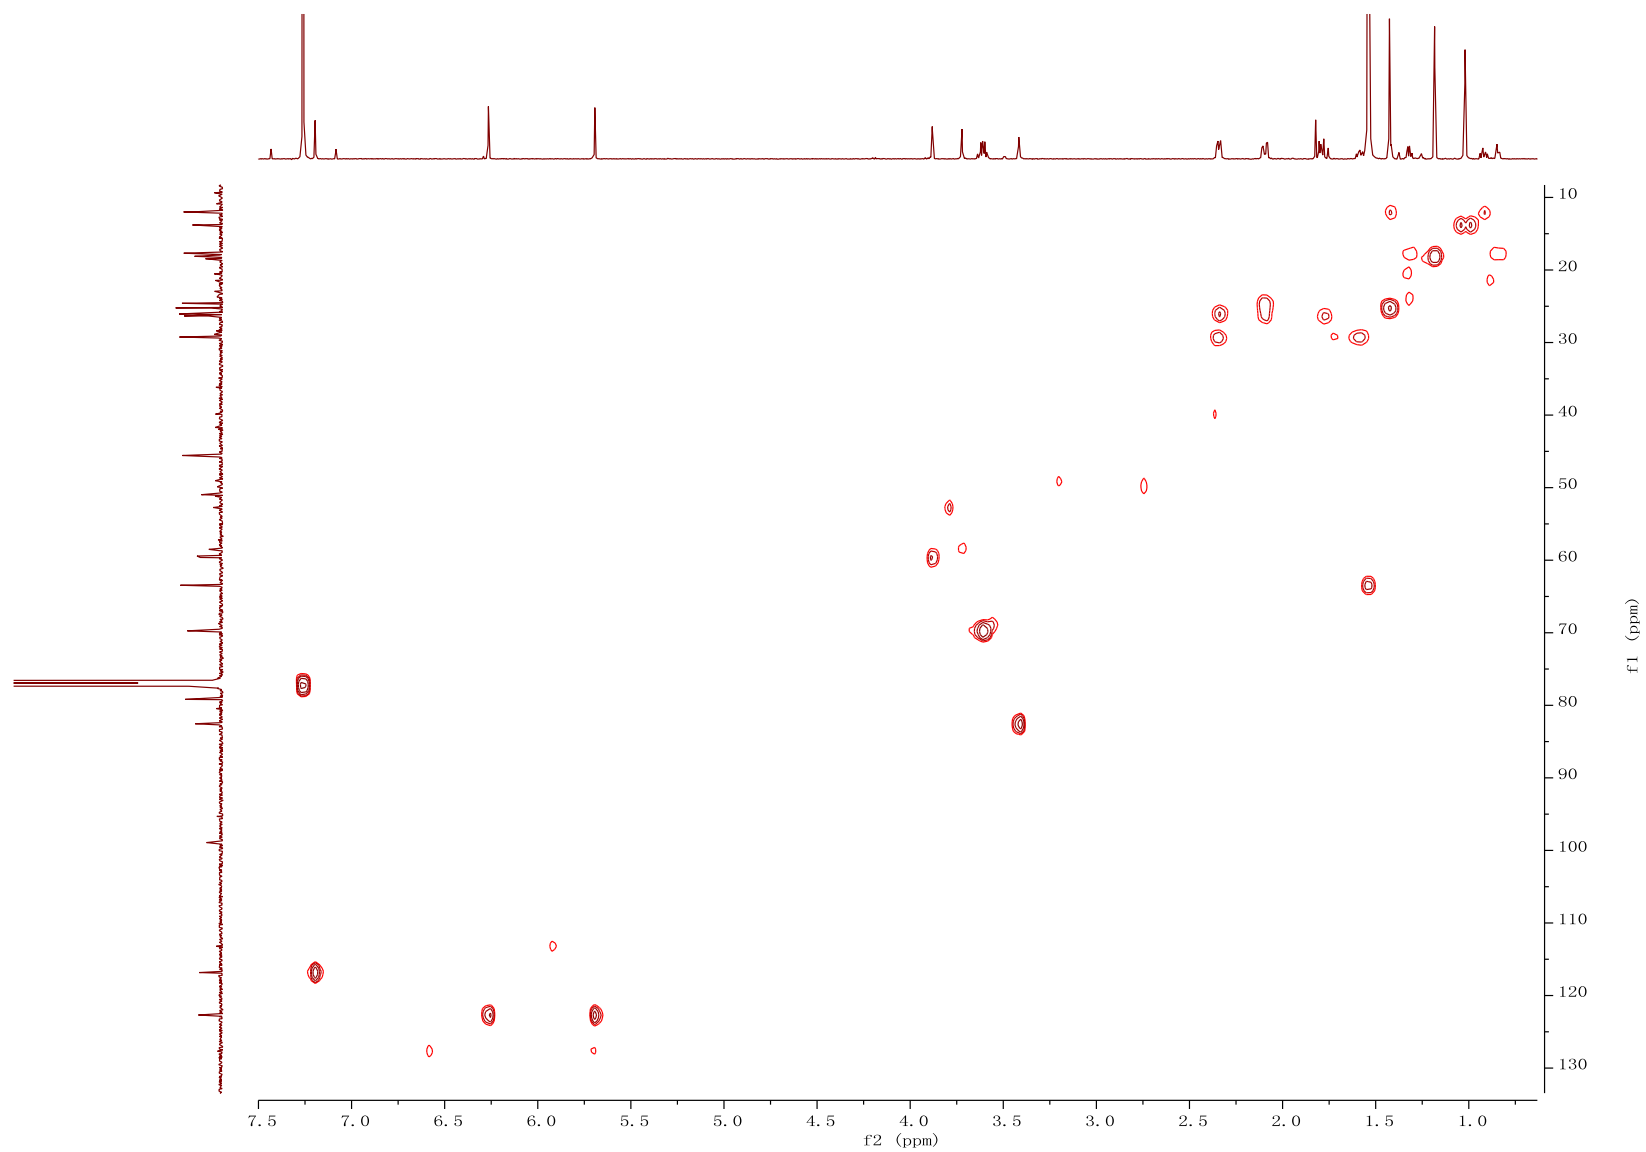

**Figure S73.** HMBC spectrum of chlorahupetone I (**9**) in CDCl<sub>3</sub>

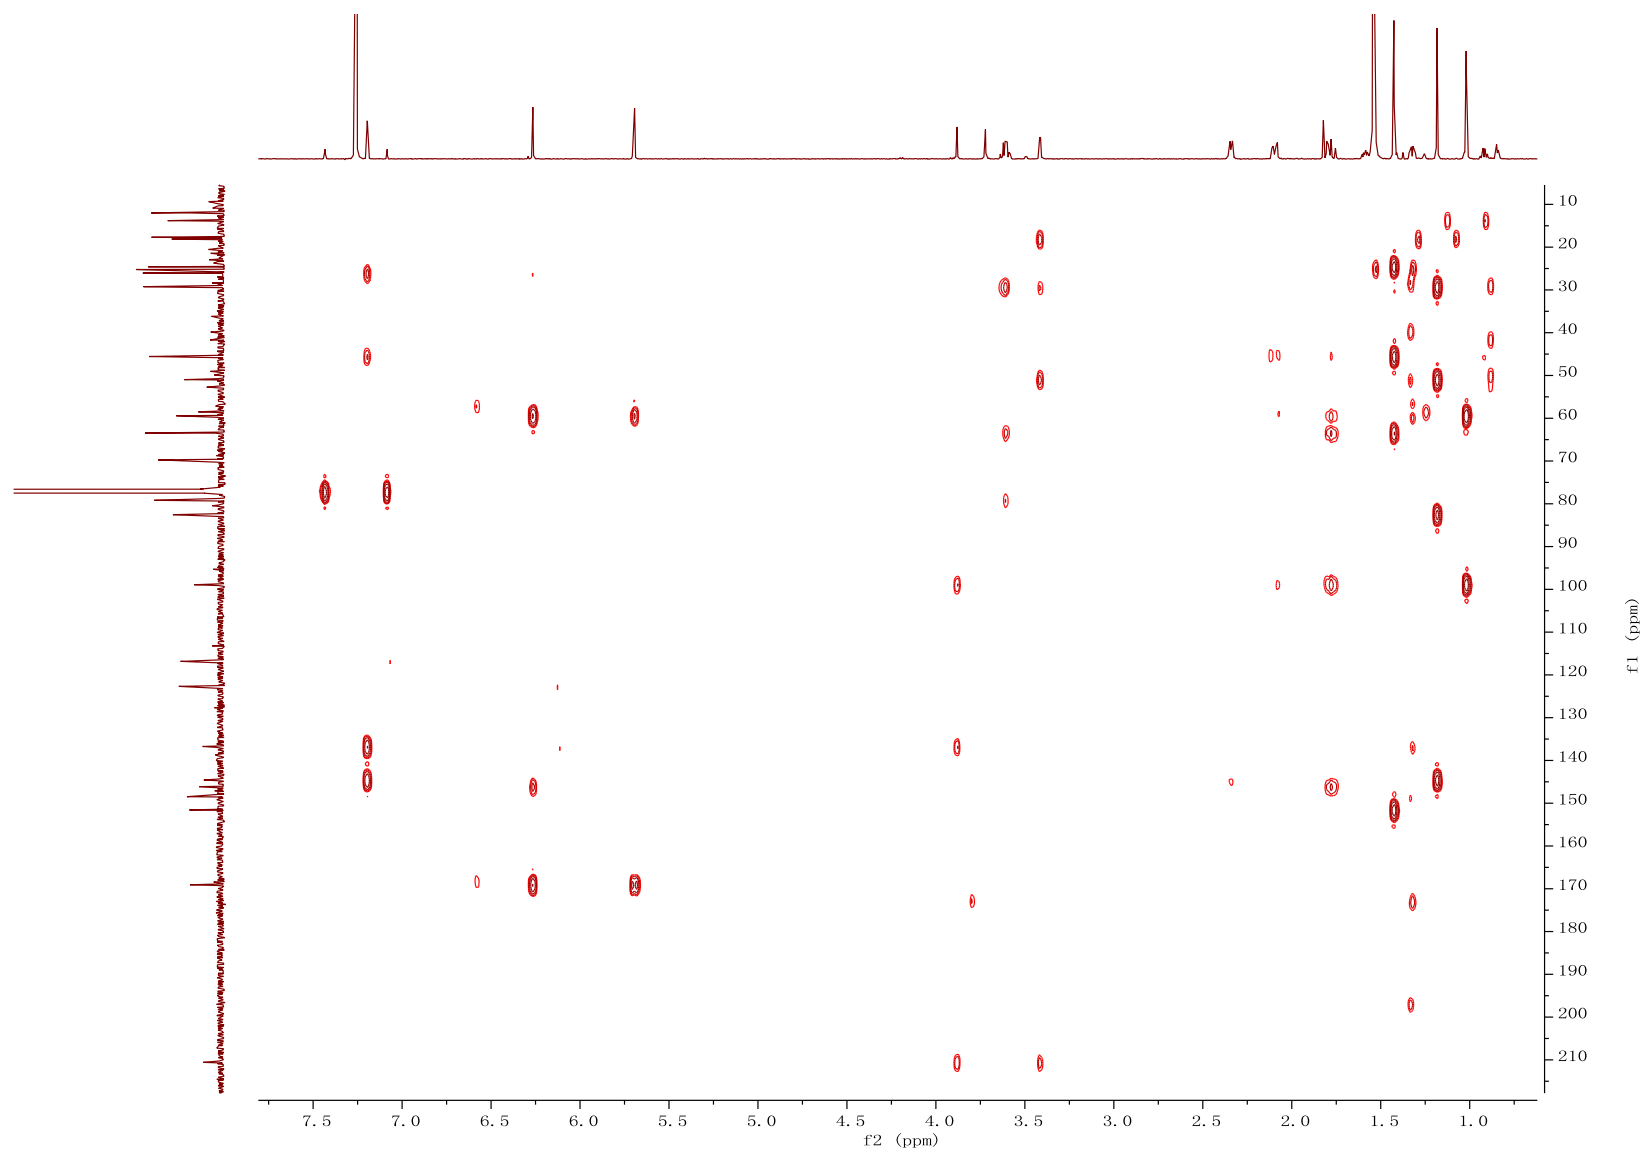

**Figure S74.**  $^1\text{H}$ - $^1\text{H}$  COSY spectrum of chlorahupetone I (**9**) in  $\text{CDCl}_3$

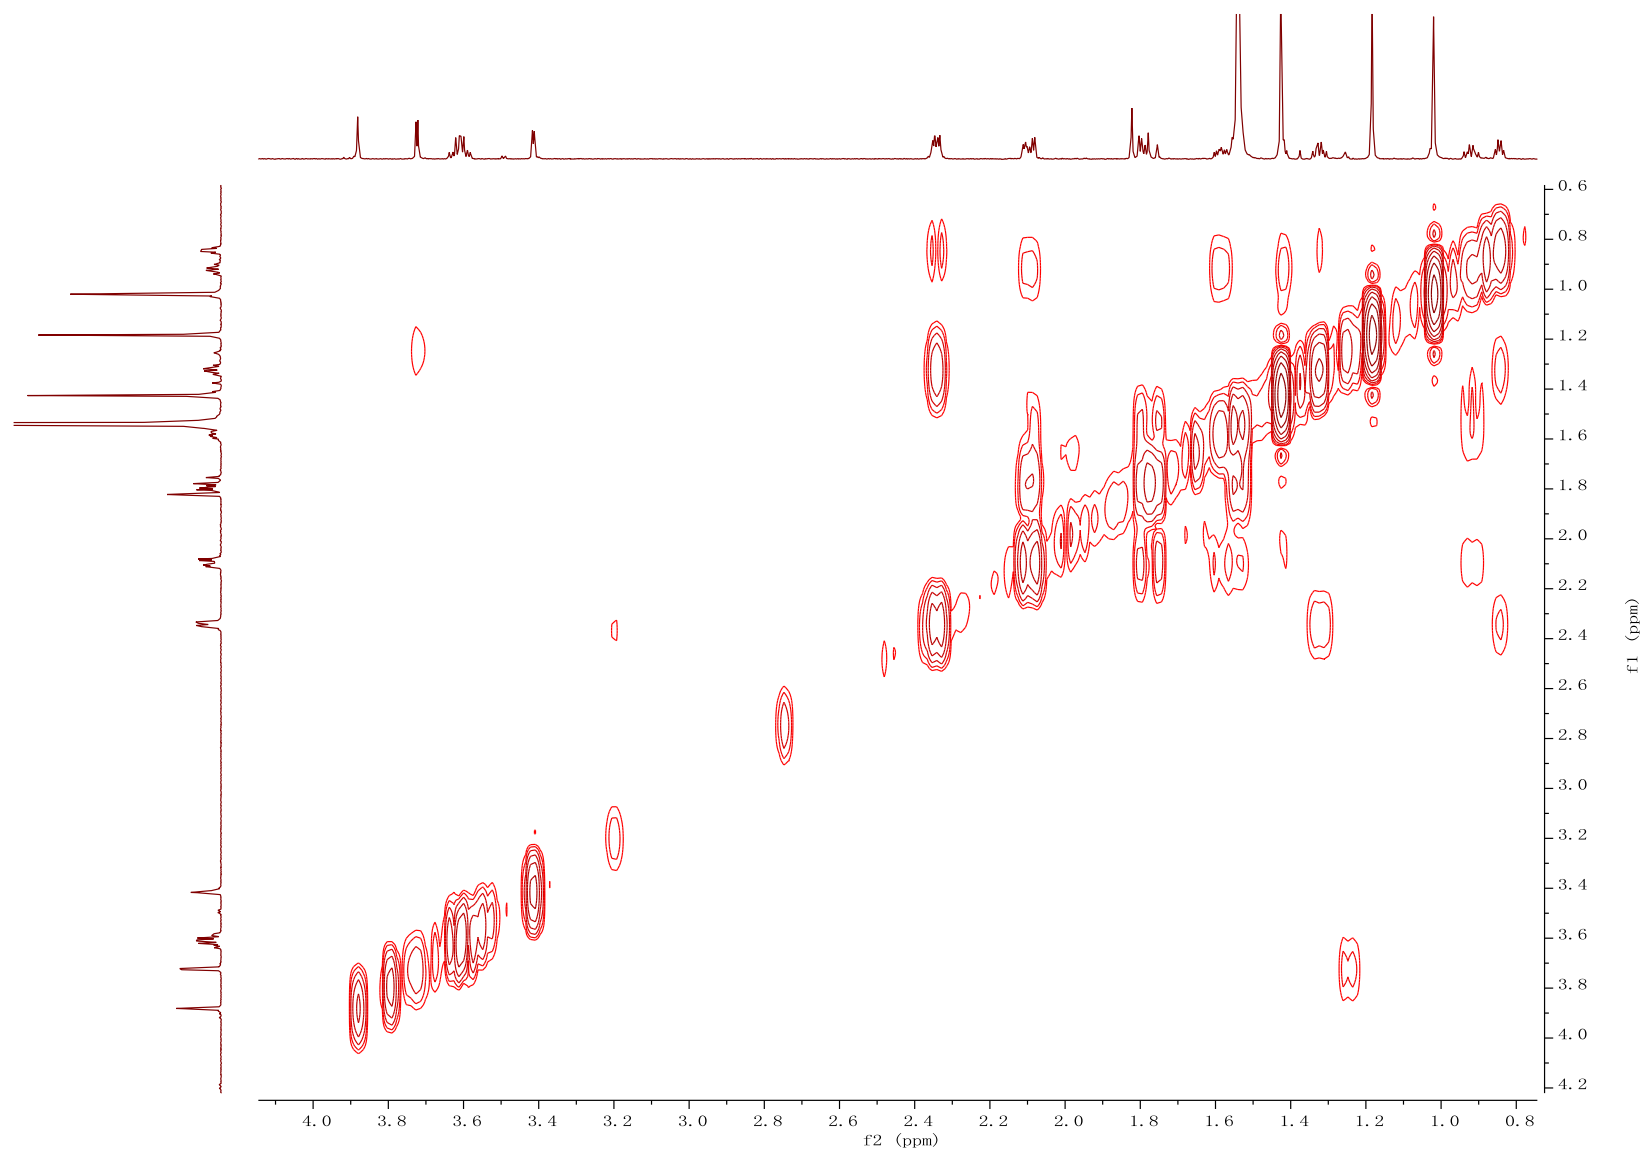

**Figure S75.** NOESY spectrum of chlorahupetone I (**9**) in CDCl<sub>3</sub>

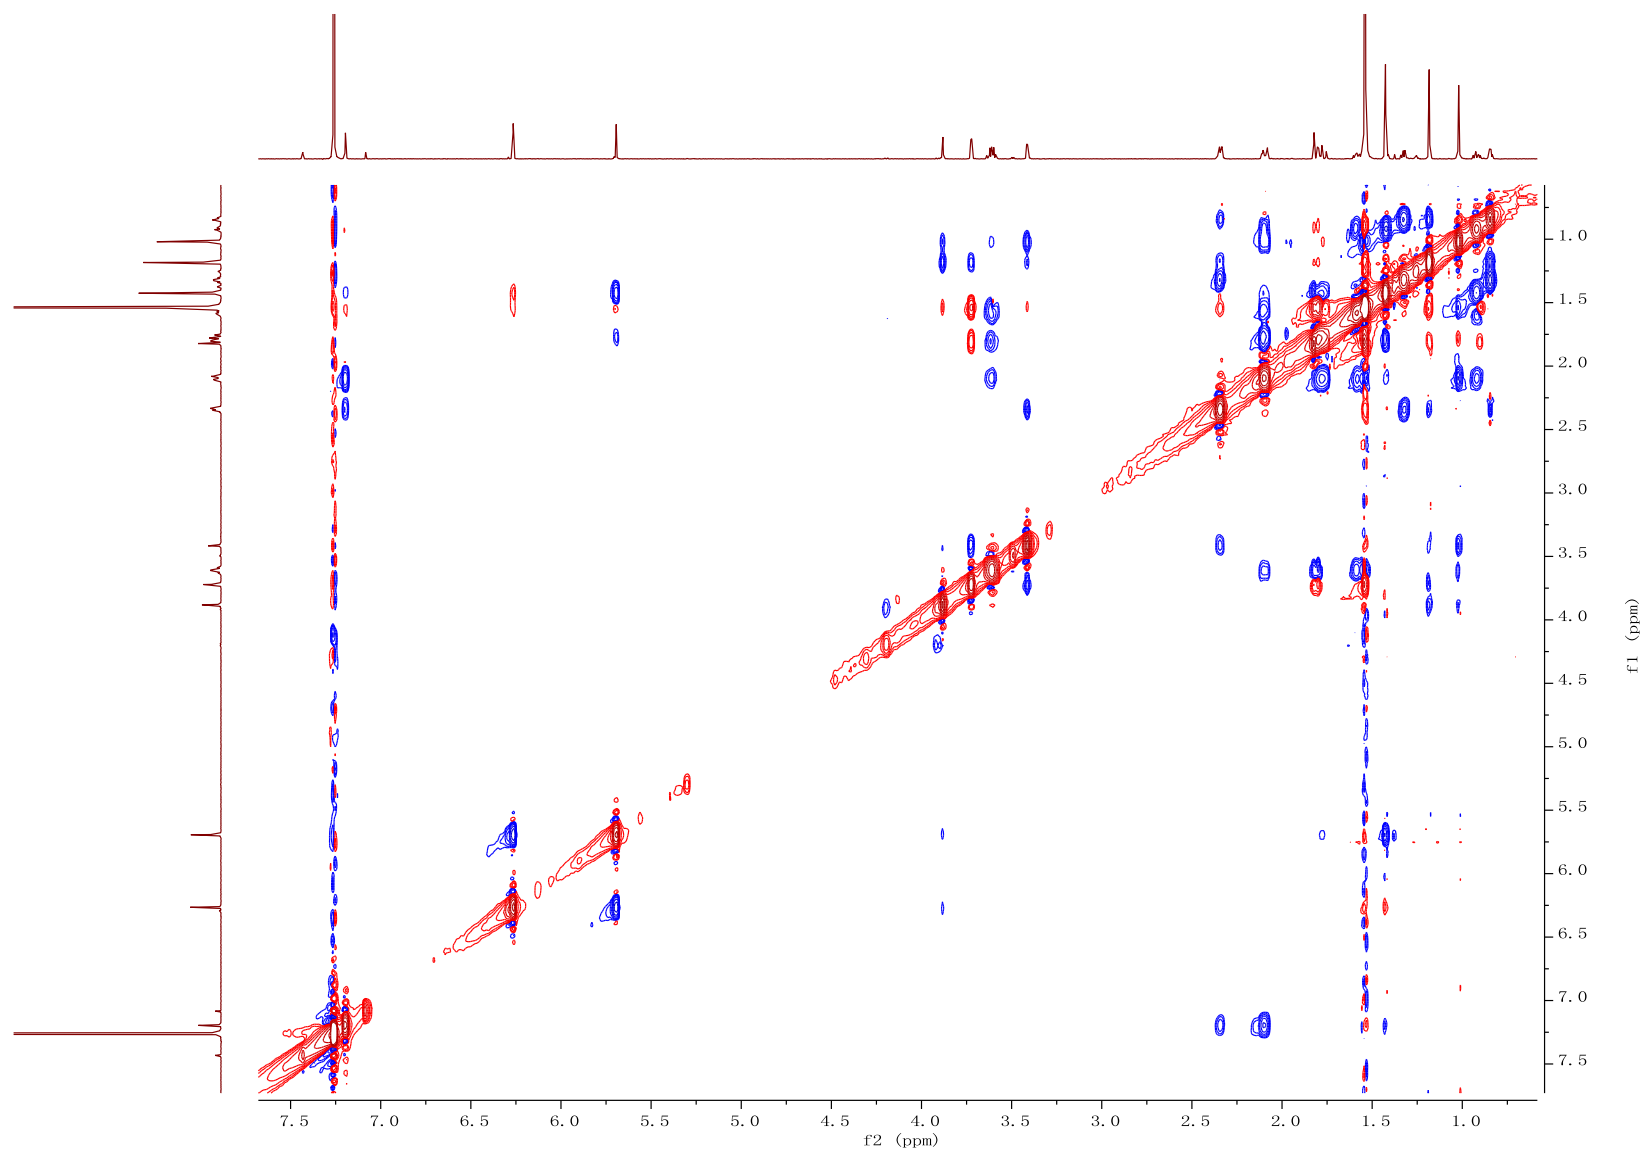



Figure S76. (+)-HRESIMS spectrum of chlorahupetone I (9)

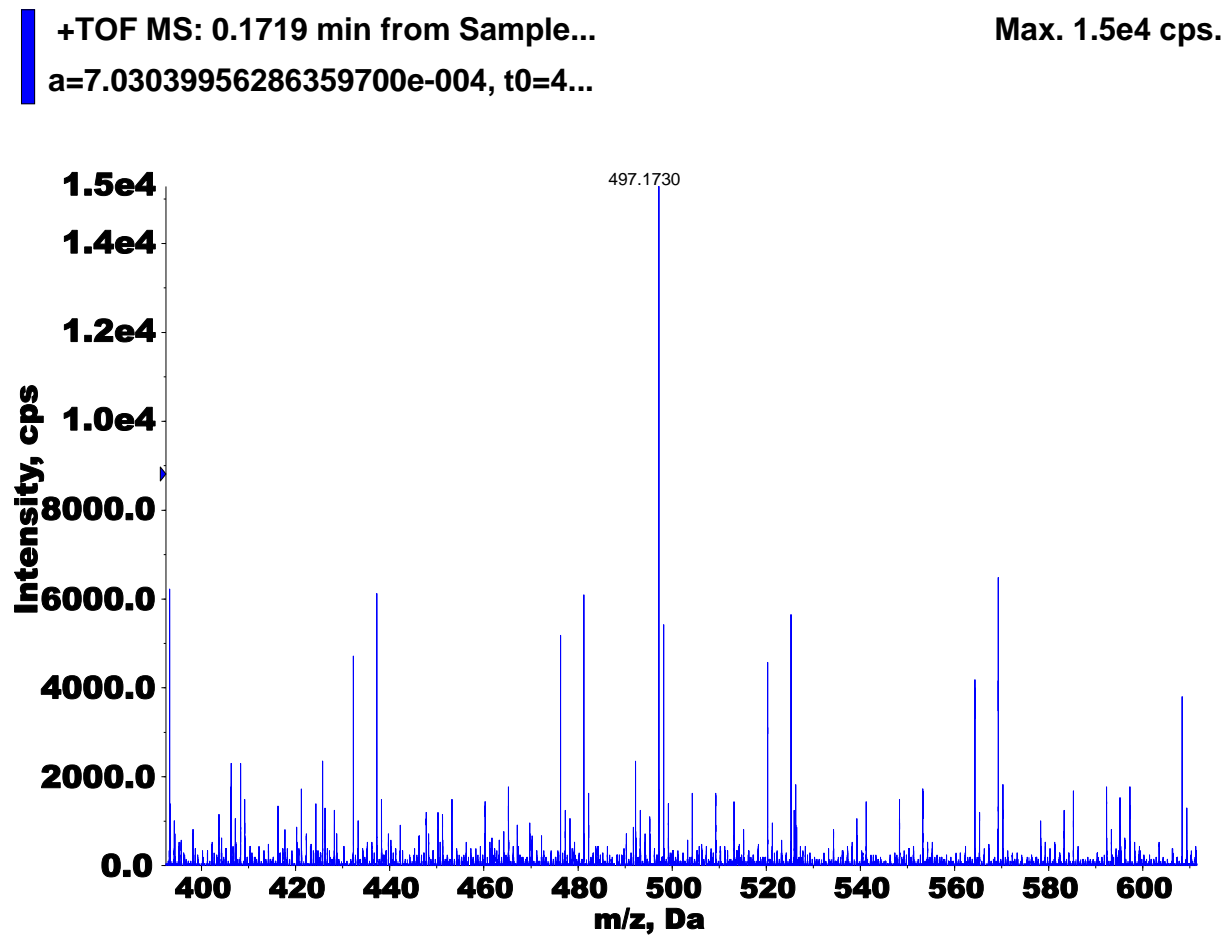

Figure S77. IR spectrum of chlorahupetone I (9)

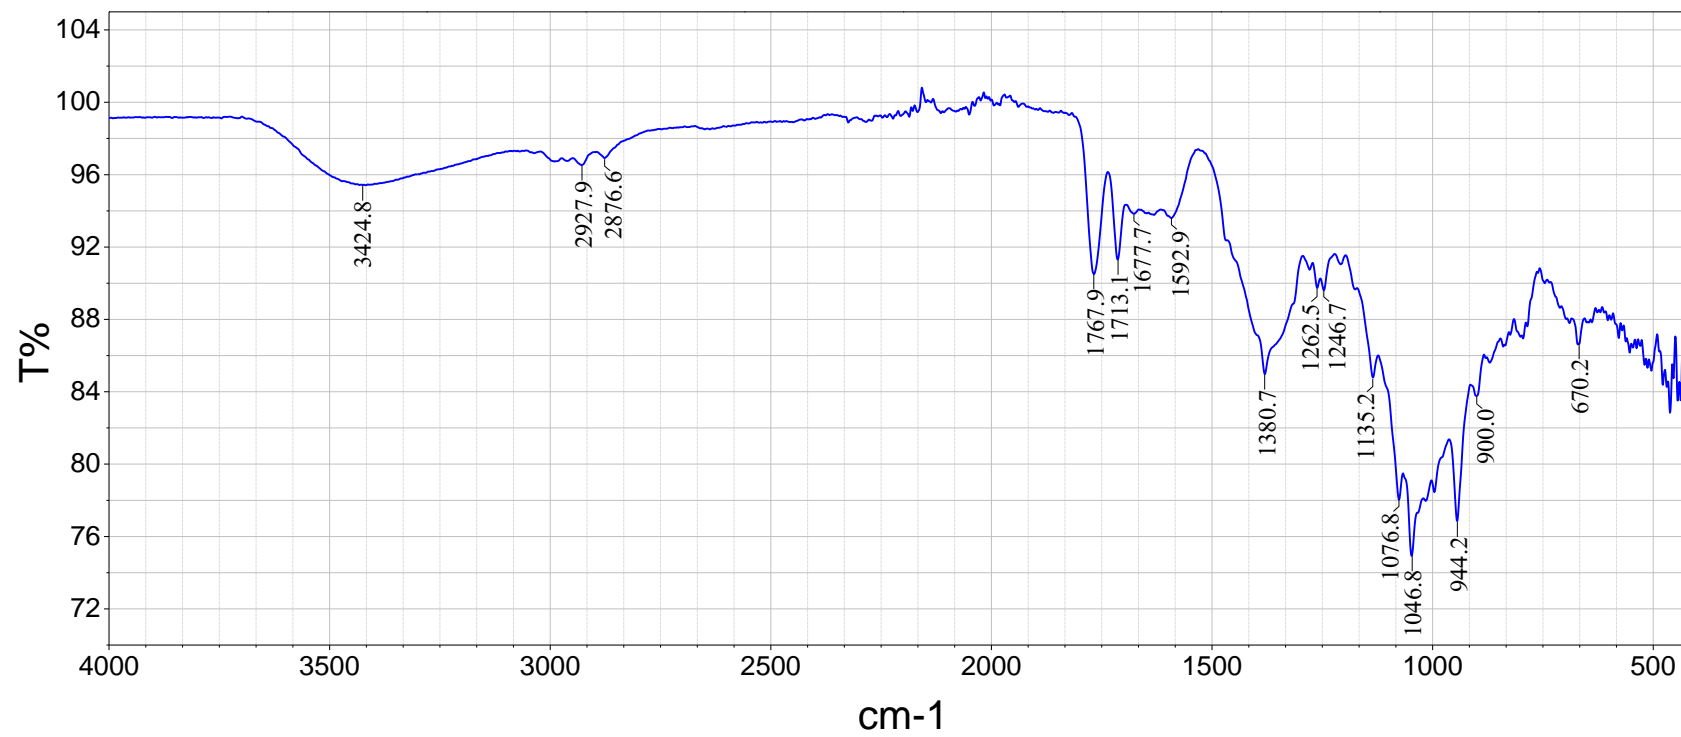

Supplement: d1qo00810b1.pdf [file d1qo00810b1.pdf]
